# Supplementary material for: Toxoplasma gondii Lysine Acetyltransferase GCN5-A Functions in the Cellular Response to Alkaline Stress and Expression of Cyst Genes
Source: PLoS Pathog. 2010 Dec 16;6(12):e1001232. doi: 10.1371/journal.ppat.1001232 (PMC3003489; doi:10.1371/journal.ppat.1001232)
Supplement: Dataset S1 — Microarray dataset of differential gene expression in wild-type and ΔGCN5-A parasites grown in alkaline pH (8.2) or control (pH 7.0) medium for three days. Data for three p values (0.001, 0.01, and 0.05) are provided. (2.49 MB XLS) [file ppat.1001232.s002.xls]

## Sheet: WT up-regulated
Gene ID	Fold change	P value	Product description
44.m02535	77.1875	0.000126205	haloacid dehalogenase-like hydrolase domain containing protein
583.m05478	45.6111	0.00484935	hypothetical protein
46.m01731	44.3805	0.00320396	hypothetical protein
80.m02300	36.8218	0.00947277	serine palmitoyltransferase, putative
162.m00312	27.4404	0.00955835	GPI-anchored surface antigen, putative
33.m01313	21.2671	0.005841	1-deoxy-D-xylulose 5-phosphate reductoisomerase, putative
42.m03469	17.8778	0.015605	malonyl CoA-acyl carrier protein transacylase, putative
80.m00083	15.7676	0.00721319	ABC transporter, putative
50.m03322	13.809	0.0218979	hypothetical protein
113.m01573	12.4111	0.0124377	hypothetical protein
65.m01149	11.3681	0.0169005	hypothetical protein
52.m01630	11.2883	0.0234872	SRS domain-containing protein
55.m05065	9.8805	0.0217379	gamma-tubulin complex component 2, putative
52.m01578	9.7514	0.0202959	Rhoptry kinase family protein, truncated (incomplete catalytic triad)
107.m00007	9.56542	0.0116947	hypothetical protein
20.m05946	9.26504	0.0227456	hypothetical protein
65.m01120	9.1173	0.00908809	hypothetical protein
583.m05287	8.92334	0.0240202	SAG2 related antigen SAG2C, putative
55.m05018	8.86398	0.0252023	hypothetical protein
65.m02534	8.48337	0.0300108	hypothetical protein, conserved
23.m00015	8.25101	0.0247454	SRS domain-containing surface antigen, putative
41.m02360	8.05463	0.0267626	aminopeptidase N, putative
76.m01603	7.98548	0.0313064	hypothetical protein
44.m02677	7.81345	0.0360401	tRNA-splicing endonuclease positive effector, putative
41.m00004	7.8012	0.0181628	acetyl-CoA carboxylase, putative
37.m00740	7.63933	0.000347272	hypothetical protein
541.m02517	7.62442	0.0292685	hypothetical protein, conserved
641.m01498	7.54237	0.0267488	3',5'--cyclic-nucleotide phosphodiesterase, putative
641.m01507	7.30637	0.0382511	protein kinase-related
76.m01548	7.01369	0.00574155	phosphatidylinositol 3- and 4-kinase domain-containing protein
46.m01732	6.94584	0.00260413	hypothetical protein
162.m00311	6.93969	0.000523118	SRS domain-containing protein
64.m00581	6.68254	0.033432	zinc finger MYND domain-containing protein
39.m00621	6.54383	0.0329107	ribonuclease H, putative
23.m00150	6.24589	0.00164751	SAG2 related antigen, putative
583.m05620	6.20603	0.0161621	hypothetical protein
49.m03421	6.12679	0.0440305	hypothetical protein
42.m03383	6.07975	0.0213161	cAMP phosphodiesterase, putative
162.m00310	6.04745	0.0471751	GPI-anchored surface antigen, putative
583.m05286	6.02016	0.0372075	hypothetical protein
64.m00345	6.00884	0.00480692	cytochrome b5, putative
35.m00893	5.81166	0.0292104	hypothetical protein
55.m04950	5.76856	0.0339284	hypothetical protein
46.m01670	5.76484	0.0213902	subtilisin-like protease, putative
641.m01540	5.71961	0.00130007	hypothetical protein
641.m01522	5.66738	0.0448466	hypothetical protein
23.m00149	5.65484	0.00466245	SAG2 related antigen, putative
59.m03630	5.65202	0.0471636	hypothetical protein
583.m05560	5.64007	0.0316824	hypothetical protein
583.m05680	5.62274	1.16236e-05	SRS domain-containing surface antigen, putative
83.m00010	5.57385	0.0290394	polyketide synthase, putative
583.m05693	5.48657	0.0024902	hypothetical protein
83.m01238	5.35395	2.37245e-05	hypothetical protein
29.m00019	5.34718	0.0331789	hypothetical protein
20.m03817	5.34624	0.000295893	AP2
541.m01207	5.32918	9.5924e-05	dihydrolipoamid dehydrogenase, putative
583.m05734	5.32295	0.0404792	phosphoinositide phosphatase SAC1
37.m00770	5.20119	0.00512773	oxidoreductase, putative
59.m03483	5.14952	0.0140481	hypothetical protein
80.m02361	5.00222	0.0446247	SAG5D, putative
583.m05285	4.89886	0.0223561	SRS domain-containing protein
33.m01267	4.77858	0.0297504	SAG2 related antigen
38.m01050	4.75074	6.17735e-05	hypothetical protein, conserved
33.m01340	4.62728	0.0308409	hypothetical protein
65.m01150	4.56986	7.80543e-05	hypothetical protein
49.m03246	4.56832	0.00197465	ADP-ribosylation factor-related
50.m03083	4.52594	0.00113589	pyruvate dehydrogenase, putative
37.m01278	4.52487	0.0012587	hypothetical protein
541.m01238	4.46778	5.39527e-08	hypothetical protein
50.m05661	4.42708	0.0475859	hypothetical protein
50.m03276	4.35408	0.0371227	kinesin motor domain-containing protein
83.m01194	4.33333	0.00349357	hypothetical protein
39.m00354	4.22492	0.00609823	hypothetical protein
72.m00401	4.20604	0.0163111	DNA polymerase epsilon subunit, putative
55.m00162	4.20084	0.000757559	hypothetical protein
59.m03663	4.17261	0.0301426	SRS domain-containing surface antigen, putative
63.m00337	4.15541	0.000366621	SRS47E
74.m00981	4.0997	0.0245333	hypothetical protein
46.m02888	4.07923	0.000220498	hypothetical protein
49.m03153	4.07242	0.000921536	hypothetical protein
583.m05491	4.06755	0.00635264	hypothetical protein
50.m00029	4.06417	0.000356244	1,4-alpha-glucan branching enzyme, putative
55.m10326	4.00011	0.00135474	hypothetical protein
55.m00202	3.98722	0.0048106	hypothetical protein
65.m01188	3.98015	0.0018166	pyridoxal-dependent decarboxylase, putative
55.m04614	3.95943	0.00435395	hypothetical protein
44.m00012	3.93901	0.000827514	3-oxoacyl-synthase, putative / acyl-carrier-protein, putative
55.m08197	3.91515	0.0233713	hypothetical protein
59.m03440	3.90879	0.0234464	actin-like protein, putative
27.m00852	3.89327	0.0268819	methionine aminopeptidase, putative
80.m02236	3.88627	0.00511043	AP2
59.m03360	3.85996	0.00656894	protein kinase, PfEST homolog
23.m00147	3.81015	0.034859	hypothetical protein, conserved
55.m10224	3.79569	0.0198062	hypothetical protein
20.m03651	3.74605	0.0144481	hypothetical protein
162.m00313	3.74498	0.000497834	GPI-anchored surface antigen, putative
44.m02804	3.74448	0.00721134	integral membrane transporter
542.m00223	3.74435	0.000860059	thymidylate kinase, putative
76.m01563	3.72554	0.0219714	DNA polymerase I, putative
46.m01736	3.71243	0.000334855	replication factor C small subunit, putative
41.m01331	3.68146	0.000204843	phosphoglycerate kinase, putative
35.m00851	3.66494	0.0105338	helicase-related
44.m00032	3.65306	0.00143979	glucosamine--fructose-6-phosphate aminotransferase [isomerizing], putative
31.m00868	3.65048	0.00910999	hypothetical protein
65.m01169	3.63901	0.000506781	D4 dopamine receptor-related
50.m00011	3.61849	0.000104084	enoyl-acyl carrier reductase
44.m02530	3.60992	0.0103093	hypothetical protein
641.m01537	3.59391	0.00286117	DNA polymerase epsilon catalytic subunit, putative
49.m03376	3.58444	4.40694e-05	hypothetical protein
641.m01523	3.58058	0.000433679	hypothetical protein
59.m07783	3.57919	0.000242979	cysteine protease domain containing protein
52.m01667	3.57109	0.000452722	protein kinase-related
72.m00409	3.55647	0.00732421	regulator of chromosome condensation domain-containing protein
80.m02185	3.54996	0.00243633	hypothetical protein
33.m01375	3.52784	0.00884597	hypothetical protein
59.m03665	3.52499	0.000248052	SRS domain-containing surface antigen, putative
83.m00003	3.51345	0.000192798	ribonucleoside-diphosphate reductase, large subunit, putative
44.m02516	3.51166	0.00456529	zinc finger (CCCH type) protein, putative
25.m01768	3.49824	0.000378243	kinesin motor domain-containing protein
20.m05883	3.48997	0.000702202	hypothetical protein
83.m01242	3.44743	0.00351239	hypothetical protein
39.m00361	3.44653	0.000174719	3'5'-cyclic nucleotide phosphodiesterase, putative
38.m01037	3.43374	0.00443105	hypothetical protein
49.m03088	3.42467	5.17827e-06	hypothetical protein
35.m00903	3.41756	0.00122364	peptide deformylase, putative
113.m00762	3.40501	0.000449083	MORN repeat-containing protein
57.m03127	3.39703	0.0159512	hypothetical protein
113.m00769	3.3796	0.000991986	membrane transporter PFB0465c
42.m03328	3.37278	0.0340966	hypothetical protein
76.m02660	3.3674	0.0422771	filamin, putative
55.m04948	3.36715	0.000732014	hypothetical protein
74.m00438	3.35621	0.00207723	aldo/keto reductase family oxidoreductase, putative
37.m00767	3.34923	0.00178032	AP2
49.m03245	3.33439	0.00324488	molybdenum cofactor biosynthesis protein c, putative
59.m03359	3.31028	0.00433524	hypothetical protein
49.m03411	3.30845	0.0442259	protein phosphatase 2C, putative
27.m00875	3.30222	0.00226708	SET domain-containing protein
33.m02193	3.29176	0.000569026	hypothetical protein
541.m01237	3.2917	5.48908e-05	oxidoreductase, putative
31.m00856	3.28804	0.00616257	myosin heavy chain-related
20.m05878	3.28341	0.00586205	kinesin motor domain-containing protein
50.m03224	3.28177	0.0142616	SNF7 protein, putative
145.m00592	3.27267	0.00657694	SNARE domain-containing protein
59.m03683	3.26934	0.0160878	signal transduction protein, putative
20.m05918	3.23925	0.0262839	hypothetical protein
83.m00008	3.22899	0.0421711	hypothetical protein
55.m04629	3.20303	0.00373392	hypothetical protein
26.m00236	3.18201	0.002544	serine/threonine-protein kinase, putative
80.m02277	3.14871	0.00616679	trichohyalin-related
641.m00011	3.1436	0.000269132	proliferating cell nuclear antigen 2, putative
59.m03618	3.13672	3.30686e-05	transketolase, putative
38.m01089	3.13062	0.000606925	hypothetical protein
76.m01567	3.09726	0.000544176	pyruvate carboxylase, putative
59.m06123	3.08973	0.000513302	hypothetical protein
25.m00004	3.08018	1.70499e-06	SAG2 related antigen SAG2B
583.m05669	3.02808	0.0133486	hypothetical protein, conserved
641.m01483	3.02117	0.000227148	AP2
33.m01325	3.02054	0.00315593	DNA replication licensing factor, putative
145.m00343	3.00794	0.00839623	SNARE domain-containing protein
49.m03154	3.0001	8.10597e-05	serine:pyruvate/alanine:glyoxylate aminotransferase, putative
76.m01642	2.99402	0.0409853	PAN domain-containing protein
33.m01294	2.99154	0.0311592	protein antigen, putative
55.m04622	2.99026	0.0233352	ankyrin repeat-containing protein
20.m00373	2.98929	0.00556652	biotin requiring domain-containing protein / 2-oxo acid dehydrogenases acyltransferase catalytic domain-containing protein
20.m00378	2.98005	9.06242e-05	hypothetical protein
583.m05288	2.97613	0.00254414	nuf2 family domain-containing protein
57.m01692	2.9685	0.00959582	SRS domain-containing, N-acetylglucosamine-phosphate mutase, putative
37.m00759	2.96384	0.00144494	hypothetical protein
49.m00049	2.95824	0.000867306	DNA replication licensing factor, putative
76.m01625	2.95356	0.00335726	SRS domain-containing surface antigen, putative
50.m03098	2.95162	0.0434738	SAG2 related antigen SAG2C-related
50.m03390	2.94911	0.00185766	hypothetical protein
55.m04698	2.94895	1.31893e-05	prefoldin subunit 3, putative
42.m03579	2.93234	0.00930083	microtubule-associated protein RP/EB family member 3, putative
113.m01584	2.92385	0.000883771	hypothetical protein
50.m03182	2.92113	1.51117e-05	glutaredoxin-related domain-containing protein
46.m01744	2.90804	0.00288826	DNA replication licensing factor, putative
55.m10333	2.90275	0.00169437	hypothetical protein, conserved
50.m03405	2.8982	0.0175858	ubiquitin-conjugating enzyme E2, putative
583.m09133	2.8931	9.38872e-05	hypothetical protein
57.m01701	2.89116	0.00740283	UDP-N-acetylhexosamine pyrophosphorylase, putative
49.m07199	2.87621	0.00362857	hypothetical protein
80.m02341	2.87107	0.000549448	hypothetical protein
80.m02257	2.86695	0.00226697	4-nitrophenylphosphatase, putative
50.m03076	2.86432	0.000726122	origin recognition complex subunit 2-related
80.m02121	2.85767	1.33812e-05	hypothetical protein
50.m03138	2.85664	0.000264114	acylamino-acid-releasing enzyme, putative
44.m02770	2.85005	6.21112e-05	deoxyuridine 5'-triphosphate nucleotidohydrolase, putative
583.m05269	2.84782	0.00472275	hypothetical protein
42.m03339	2.84013	0.00960303	ankyrin repeat-containing protein
74.m00977	2.83987	0.000857962	hypothetical protein
80.m00077	2.83599	0.000258674	cation-transporting ATPase, putative
20.m00342	2.82183	0.000494791	replication factor A-related protein, putative
41.m01272	2.81986	0.00164159	hypothetical protein, conserved
145.m00336	2.81754	0.00380742	hypothetical protein
41.m00032	2.8167	5.18139e-05	aldehyde dehydrogenase, putative
72.m00003	2.80932	0.00569329	p18 surface antigen
46.m02891	2.7989	0.00904908	hypothetical protein
44.m02536	2.79774	0.00283892	hypothetical protein
49.m05705	2.79014	0.00193454	plectin, putative
59.m03425	2.78035	0.00353748	hypothetical protein
641.m02550	2.77786	0.00605911	hypothetical protein
52.m01680	2.77426	0.00208479	hypothetical protein
583.m05578	2.76916	9.04046e-05	hypothetical protein
50.m03314	2.76792	0.0163613	DNA-directed RNA polymerase alpha chain, putative
65.m01205	2.76504	0.0378698	cell wall protein-related
20.m03696	2.76358	0.0289351	hypothetical protein
541.m02037	2.76076	0.0488888	hypothetical protein
583.m05468	2.75064	0.0070356	hypothetical protein
59.m03538	2.74841	6.59756e-06	poly [ADP-ribose] polymerase-1, putative
59.m06055	2.7461	6.15438e-06	hypothetical protein
55.m00255	2.73385	0.00119948	DNA primase small subunit, putative
80.m02295	2.71812	0.0265434	hypothetical protein
583.m05632	2.71753	0.00551547	dolichyl pyrophosphate Glc1Man9GlcNAc2 alpha-1,3-glucosyltransferase, putative
31.m00893	2.71141	0.00209312	hypothetical protein
20.m03752	2.69515	0.0168947	zinc finger (CCCH type) protein, putative
38.m01060	2.69328	0.00091129	cyclin-dependent kinase-related
37.m00739	2.69068	7.99132e-05	hypothetical protein
64.m00323	2.68189	0.00621939	protein kinase, putative
55.m08192	2.67942	9.50926e-07
80.m02180	2.67726	0.000196827	hypothetical protein
641.m01515	2.67698	0.000287579	hypothetical protein
48.m00100	2.66793	0.00230511	calcium-dependent protein kinase, putative / calmodulin-domain protein kinase, putative
641.m00168	2.66677	0.000437826	malate dehydrogenase, putative
42.m00103	2.66672	4.07106e-05	DNA-binding protein HU, putative
76.m01608	2.66352	0.012923	hypothetical protein
55.m00137	2.65801	0.0268766	multidrug resistance protein, putative / ABC transporter, putative
65.m01136	2.6518	0.0374542	ubiquitin carboxyl-terminal hydrolase, putative
76.m00012	2.64923	0.00216606	hypothetical protein
80.m02253	2.64889	0.00441091	uroporphyrinogen decarboxylase, putative
59.m03561	2.64688	0.0043406	hypothetical protein
33.m01306	2.64411	0.00489381	hypothetical protein
583.m05646	2.64399	0.00578517	ubiquitin-activating enzyme E1-related
541.m02061	2.64265	0.0073347	hypothetical protein
583.m05452	2.63878	0.00110509	platelet binding protein GspB, putative
20.m03976	2.63018	0.00166938	hypothetical protein
49.m03433	2.62845	0.00943026	adenosine deaminase acting on tRNA1-related
57.m01743	2.62539	0.000884081	hypothetical protein
55.m05062	2.61223	0.0010325	ubiquitin carboxyl-terminal hydrolase isozyme, putative
31.m00903	2.59861	0.00593452	hypothetical protein
583.m05330	2.59524	0.000316999	PEANUT1
44.m02600	2.58806	0.000204273	hypothetical protein
41.m01356	2.58787	0.000506635	hypothetical protein
50.m03243	2.58253	0.0191054	phosphatidylinositol 3- and 4-kinase domain-containing protein
72.m00379	2.57826	0.00540072	hypothetical protein
583.m11428	2.57186	0.0279585	hypothetical protein
583.m09212	2.56715	0.00141326	hypothetical protein
55.m10281	2.56534	3.37003e-06	hypothetical protein
113.m00001	2.56069	0.00236487	hypothetical protein
55.m04865	2.55878	0.000162376	microneme protein, putative
80.m03944	2.5586	0.00115729	hypothetical protein
59.m03644	2.55801	0.00540985	calcium/calmodulin-dependent 3',5'-cyclic nucleotide phosphodiesterase, putative
57.m01720	2.55518	0.00246207	tubulin-tyrosine ligase family domain containing protein
44.m05929	2.55282	0.00222711
49.m03416	2.55101	0.00209806	tubulin-tyrosine ligase family protein
42.m07402	2.54308	0.00956637	CutA1 divalent ion tolerance domain-containing protein
55.m10273	2.54245	0.000447513	hypothetical protein
52.m03442	2.54056	0.00220883	GTP cyclohydrolase I, putative
42.m03585	2.53384	0.00750776	hypothetical protein
44.m05934	2.5338	0.000936204	hypothetical protein
583.m05675	2.53199	0.000820458	hypothetical protein
542.m00224	2.52913	0.0431526	chemotaxis protein
86.m00369	2.52849	0.0105403	hypothetical protein
38.m01077	2.52758	8.01258e-05	DNA replication licensing factor, putative
20.m05948	2.52591	0.00035387	hypothetical protein
583.m05449	2.52538	0.00019158	hypothetical protein
83.m00009	2.52445	0.00971504	DHHC zinc finger domain-containing protein
49.m05649	2.52435	0.000134722	bolA-like protein-related
37.m00009	2.5229	0.0273744	hypothetical protein
42.m03481	2.52027	0.00199396	hypothetical protein
541.m01232	2.4988	0.00673906	hypothetical protein
46.m01716	2.48783	0.000556519	haloacid dehalogenase-like hydrolase domain-containing protein
80.m02273	2.47994	0.0211072	ABC transporter, putative
41.m01283	2.47652	0.00221618	hypothetical protein
20.m05919	2.47491	0.00110391	hypothetical protein
49.m03081	2.46651	0.00205254	thioredoxin, putative
59.m03687	2.4643	0.0162985	phosphatidylserine synthase I, putative
641.m00183	2.46084	0.00203645	queuine tRNA-ribosyltransferase, putative
42.m07425	2.45775	0.0010339	hypothetical protein, conserved
583.m05687	2.45583	0.000439142	hypothetical protein
55.m04959	2.4504	0.0103768	hypothetical protein
42.m00086	2.44538	0.0323769	hypothetical protein
551.m00229	2.44459	2.74031e-05	6-phosphogluconate dehydrogenase, putative
641.m01532	2.44401	0.00233461	kinesin motor domain-containing protein
76.m01670	2.43664	0.000223402	peroxiredoxin family protein/glutaredoxin, putative
583.m05275	2.43538	0.00562277	hypothetical protein
50.m03094	2.42508	0.000999705	hypothetical protein, conserved
80.m00049	2.42278	0.000368654	opine dehydrogenase, putative
44.m02737	2.42268	0.002726	phosphatase PTEN-related
20.m03852	2.4166	0.00753966	hypothetical protein
55.m04883	2.41657	0.00436207	HEC/Ndc80p family protein, putative
80.m02294	2.41554	0.000115387	NUDIX domain-containing protein
27.m00857	2.41406	0.00914839	hypothetical protein, conserved
57.m01793	2.40781	0.000200099	lysine decarboxylase domain-containing protein
583.m05505	2.40614	0.0119826	hypothetical protein
35.m00848	2.40441	0.0331404	acetyl-CoA transporter, putative
50.m03192	2.40037	0.000604464	ATPase 2, putative
52.m01558	2.3843	0.000603625	hypothetical protein
583.m09175	2.38288	0.000109787	proteasome subunit beta type 3, putative
55.m08201	2.38285	0.00043773	vacuolar protein sorting 26, putative
145.m00338	2.38237	0.00144681	hypothetical protein
44.m02820	2.38095	0.0117833	hypothetical protein
20.m07752	2.37807	0.00256089	hypothetical protein
65.m02514	2.37283	0.0105634	hypothetical protein
113.m01284	2.37279	0.00514948	hypothetical protein
641.m02570	2.3723	0.000200208	hypothetical protein
83.m02144	2.37226	0.0282418	histone acetyltransferase, putative
63.m00152	2.37155	0.00107524	hypothetical protein
64.m00327	2.36937	0.000760249	membrane skeletal protein IMC1-related
27.m00081	2.36876	6.13569e-05	hypothetical protein
55.m04676	2.36874	0.00948795	hypothetical protein
59.m03654	2.36818	0.0153982	DNA repair protein, putative
33.m01374	2.36545	0.00116457	hypothetical protein, conserved
645.m00546	2.36477	7.32119e-05	hypothetical protein
49.m05666	2.36064	0.000273093	hypothetical protein
83.m01239	2.35819	0.0284555	hypothetical protein
57.m01782	2.35718	0.00421103	beta-adaptin-like protein, putative
49.m03283	2.35526	0.00975055	B-box zinc finger protein, putative
583.m00629	2.35311	0.0045341	non-muscle myosin heavy chain, putative
113.m00792	2.34348	0.0133599	trehalose-6-phosphate synthase domain-containing protein
49.m05715	2.34096	0.000266186	OTU-like cysteine protease domain-containing protein
57.m00028	2.34021	1.27012e-05	isocitrate dehydrogenase, putative
57.m01873	2.33496	0.0271991	hypothetical protein
20.m03934	2.33285	0.00411487	hypothetical protein
59.m00087	2.33245	0.00106752	TPR domain-containing protein
76.m01556	2.33092	0.00152773	hypothetical protein
55.m05021	2.32836	0.00204242	enterophilin-2L, putative
583.m09110	2.32381	0.00420535	hypothetical protein
49.m05689	2.32283	2.30826e-05	hypothetical protein
25.m01843	2.321	0.0024819	thrombospondin type 1 domain-containing protein
37.m00766	2.31991	0.00285616	hypothetical protein
25.m01789	2.31842	0.00297971	hypothetical protein
49.m07196	2.31351	0.000135619	hypothetical protein
583.m05440	2.31207	0.0039156	WD repeat domain-containing protein
49.m03392	2.31173	0.0368901	hypothetical protein
65.m01101	2.3111	0.0174712	SNF2 family helicase, putative
59.m03696	2.30637	0.000464816	hypothetical protein
20.m03668	2.3036	0.00531959	transport protein sec13-related
55.m04822	2.30233	0.00115308	hypothetical protein
44.m02574	2.30116	0.000178013	acetyltransferase domain-containing protein
44.m02731	2.29879	2.95384e-06	hypothetical protein
55.m00019	2.2936	0.000179305	acyl carrier protein
57.m01784	2.29279	0.000210748	glycosyltransferase sugar-binding region containing DXD motif-containing protein
641.m01566	2.29158	0.000943123	GPI-anchored surface antigen, putative
55.m05019	2.28696	0.000229451	NADH-cytochrome B5 reductase, putative
50.m03307	2.28384	0.0169251	tRNA-Leu, hypothetical protein
80.m02330	2.2826	0.0126897	hypothetical protein
59.m03543	2.28155	0.00229481	ATPase, AAA family domain-containing protein
49.m03114	2.27555	0.000371602	hypothetical protein
55.m10283	2.27264	1.78782e-05	hypothetical protein
44.m02788	2.26641	0.000228636	hypothetical protein
57.m01883	2.26317	0.0130417	hypothetical protein
80.m02207	2.25275	0.00199511	cullin homolog, putative
55.m04754	2.2525	0.00875138	hypothetical protein
540.m00200	2.25229	0.0025834	DNA-damage inducible protein-related
55.m04978	2.25157	0.00238067	kelch motif domain-containing protein
46.m01743	2.24752	0.000145061	protein kinase-related
44.m02673	2.24678	3.2782e-05	hypothetical protein
83.m02691	2.24399	0.00269633	hypothetical protein
50.m03070	2.2435	0.0115386	dipeptidyl peptidase IV domain-containing protein
583.m05471	2.24134	0.00371356	DNA topoisomerase II, putative
31.m00936	2.24037	0.00884349	hypothetical protein
57.m01870	2.24031	0.000437701	hypothetical protein
52.m01567	2.24011	0.000925834	cell wall protein-related
59.m03392	2.23782	0.000194297	DNA polymerase alpha subunit-related
55.m04660	2.23488	0.00822052	phosphatidylinositol-4-phosphate 5-kinase-related
541.m01189	2.23184	0.00195461	hypothetical protein
80.m04000	2.22916	0.0158074	hypothetical protein
49.m03236	2.22911	0.000169041	L-type amino acid transporter-related
23.m00001	2.22735	0.00110542	ribonucleotide-diphosphate reductase, small subunit, putative
55.m05114	2.22604	0.00723407	hypothetical protein
50.m00018	2.2259	1.06489e-06	adenosine kinase
41.m01383	2.22536	0.012769	dynein light chain, putative
57.m01755	2.22083	0.00694233	protein phosphatase 2C-related
50.m03302	2.2202	0.00130021	hypothetical protein
50.m03356	2.21939	9.55648e-05	caltractin (centrin), putative
583.m00655	2.21725	0.00135796	nucleoredoxin-related
25.m01818	2.21361	0.000289509	mitochondrial carrier domain-containing protein
8.m00374	2.21359	0.014992	hypothetical protein
57.m01741	2.21159	0.0261419	TPR domain-containing protein
20.m03880	2.21071	0.00164265	hypothetical protein
583.m11422	2.20891	0.0175356	hypothetical protein
583.m11425	2.20878	0.00144343	transporter-related
76.m01587	2.19851	4.52712e-05	hypothetical protein
57.m01840	2.19714	0.00283954	SRS domain-containing surface antigen, putative
42.m03296	2.19499	0.0184741	hypothetical protein
541.m01185	2.19188	0.000159521	ABC transporter, putative
31.m01829	2.18825	0.0376423	hypothetical protein
55.m10346	2.18662	0.00618504	hypothetical protein
113.m00801	2.18606	0.000973885	hypothetical protein
83.m01248	2.18529	0.00886303	yrdC domain protein
46.m02898	2.18345	0.0219983	hypothetical protein
641.m03146	2.1825	0.00686951	DNA replication inhibitor plutonium-related
86.m00652	2.18089	0.0217827	hypothetical protein
35.m00895	2.17879	9.93803e-05	EF hand domain-containing protein
52.m01644	2.17804	0.0054967	hypothetical protein
44.m02816	2.17429	0.000525306	DNA polymerase delta small subunit, putative
113.m01288	2.17385	0.0104867	SMC (structural maintenance of chromosomes) protein, putative
583.m05570	2.17076	3.37224e-05	hypothetical protein
583.m05299	2.17057	0.000483902	hypothetical protein
55.m04912	2.16494	0.000749005	DNA mismatch repair protein, putative
55.m04704	2.16468	0.00112322	plectin-related
59.m03702	2.16363	0.000692347	TGF-beta resistance-associated protein-related
50.m05676	2.16296	7.98122e-05	hypothetical protein
44.m02814	2.16106	0.00220286	hypothetical protein
20.m03655	2.15979	0.0244687	hypothetical protein, conserved
44.m02570	2.15929	3.62035e-05	hypothetical protein
55.m04926	2.15884	0.00088295	histone H2A, putative
59.m06103	2.15806	0.00479995	hypothetical protein
55.m04796	2.15791	0.000934376	hypothetical protein
80.m02357	2.15552	0.0227478	ankyrin repeat-containing protein
64.m00342	2.1539	0.0262984	tubulin epsilon chain, putative
80.m00078	2.14985	0.023558	hypothetical protein
64.m00344	2.14859	0.0127524	hypothetical protein
59.m06065	2.14495	0.0263467	hypothetical protein
49.m03101	2.14435	0.0176846	immediate-early protein-related / herpesviruses IE68 family protein-related
49.m03267	2.1419	0.00887892	3', 5'-cyclic nucleotide phosphodiesterase, putative
541.m01227	2.14064	0.00500415	structural maintenance of chromosome (SMC) domain-containing protein
8.m00373	2.13946	0.0375659	hypothetical protein
59.m06100	2.13606	0.0010953	B-box zinc finger protein, putative
35.m00906	2.13303	0.0027158	DNA replication licensing factor, putative
49.m03276	2.1263	6.40991e-05	protein kinase domain-containing protein
583.m05758	2.12314	3.68411e-05	hypothetical protein
49.m03223	2.1216	0.000932447	myosin light chain kinase, putative
59.m03723	2.11976	0.000232515	thiF family domain-containing protein
50.m03134	2.11722	0.00836466	hypothetical protein
20.m03683	2.11676	0.000284938	TPR domain-containing protein
76.m01549	2.11586	0.00230194	longevity-assurance (LAG1) domain-containing protein
50.m03191	2.11259	0.0487373	hypothetical protein, conserved
59.m03608	2.11146	0.0345787	hypothetical protein
583.m00704	2.10872	2.41183e-05	hypothetical protein
31.m00932	2.10772	0.000586184	hypothetical protein
80.m03982	2.10748	0.00386454	hypothetical protein
50.m05682	2.107	0.00374805	hypothetical protein
59.m03459	2.10619	0.000502224	biotin carboxyl carrier protein, putative
59.m03368	2.1056	0.000805936	phosphoinositide-dependent protein kinase, putative
541.m02062	2.10462	0.000707953	hypothetical protein
20.m03724	2.10332	0.00144113	hypothetical protein
583.m05389	2.10281	0.000582728	apyrase, putative
55.m04824	2.10074	0.0111431	ATP-dependent DNA helicase, putative
49.m03212	2.10039	0.000260311	maf-like protein, putative
44.m02714	2.10009	0.0046277	hypothetical protein
46.m01752	2.09953	0.00246832	hypothetical protein, conserved
50.m03280	2.09652	0.00367964	ras family domain-containing protein
26.m00235	2.09118	0.00085247	lava lamp protein-related / peripheral golgi protein-related
49.m00001	2.09027	0.0123468	myosin E, putative
44.m05928	2.08481	0.00117289	hypothetical protein
641.m02544	2.08454	0.0196071	hypothetical protein
38.m01081	2.08256	0.0106328	mismatch repair protein-related
541.m02044	2.08012	0.00168434	hypothetical protein
57.m01745	2.0785	0.000975635	hypothetical protein
55.m04942	2.07618	0.00714328	histone H2A, putative
76.m01599	2.0731	0.0227028	hypothetical protein
25.m01849	2.0724	0.00253438	anti-silencing protein 1, putative
55.m04902	2.06745	0.0434796	hypothetical protein
49.m03179	2.06686	0.00248281	hypothetical protein
41.m02949	2.06435	0.00255191	hypothetical protein
83.m01219	2.06424	0.000395691	poly(ADP)-ribose polymerase-related
83.m02696	2.06191	0.000172226	hypothetical protein
49.m03332	2.06119	0.000790918	hypothetical protein
583.m11449	2.05852	0.0177124	hypothetical protein
46.m03691	2.05556	0.00360134	cytochrome b, putative
38.m00013	2.05528	0.000803137	histidyl tRNA synthetase 2
641.m00181	2.05346	0.000100306	hypothetical protein
80.m03967	2.05258	5.70753e-05	hypothetical protein
42.m03322	2.05173	7.14664e-05	hypothetical protein
55.m04728	2.04927	0.0394929	hypothetical protein
55.m05059	2.04858	0.000469211	ubiquitin carboxyl-terminal hydrolase, putative
52.m01606	2.04643	0.00064466	importin-alpha re-exporter, putative
80.m00016	2.0453	0.016974	chromosome segregation protein smc1-related
50.m00016	2.04501	9.75139e-05	bifunctional dihydrofolate reductase-thymidylate synthase (DHFR-TS)
52.m01539	2.04123	1.80636e-05	DNA polymerase epsilon p17 subunit, putative
41.m01360	2.04036	0.00535888	SRS domain-containing protein
52.m01549	2.03932	0.00055266	vacuolar protein sorting 29, putative
641.m01548	2.03924	1.71147e-05	L-type amino acid transporter-related
33.m01307	2.03696	0.000131763	hypothetical protein
551.m00022	2.03467	1.66466e-05	ATP-binding protein-related
49.m03432	2.03411	0.000142555	glucoamylase S1/S2 precursor-related
20.m03729	2.03267	0.0266715	ribophorin I, putative
49.m03251	2.03122	0.00181302	hypothetical protein
641.m00192	2.01874	0.000152375	TCP-1/cpn60 family chaperonin, putative
44.m02526	2.01457	0.0178009	hypothetical protein
52.m00007	2.01335	7.51117e-05	proteasome subunit beta type 2, putative
50.m03132	2.01305	0.00229734	hypothetical protein
25.m01855	2.01272	5.30754e-05	hypothetical protein, conserved
44.m02594	2.01109	0.000244235	calcium-transporting ATPase, putative
50.m03375	2.01079	0.00335553	26S proteasome regulatory particle non-ATPase subunit-related
26.m00247	2.0105	0.011852	DnaJ domain-containing protein
44.m04631	2.00976	0.0186791	SWIB/MDM2 domain-containing protein
57.m01783	2.00974	0.000969341	hypothetical protein
49.m07231	2.0084	0.000143006	hypothetical protein
49.m05731	2.00791	0.00010799	UDP-N-acetylglucosamine-1-phosphate transferase, putative
55.m00168	2.00734	2.08251e-05	ATP synthase beta chain, putative
50.m05656	2.00631	0.000520118	mitochondrial carrier domain-containing protein
80.m02355	2.00588	0.0122079	serine/threonine-protein kinase, putative / NimA-related protein kinase, putative
583.m05771	2.00443	0.00835596	hypothetical protein
39.m00356	2.00351	2.84382e-05	lysyl-tRNA synthetase-related
49.m03407	2.00273	4.71104e-05	hypothetical protein
583.m05499	2.00088	0.00228597	hypothetical protein, conserved
55.m04610	1.99852	0.00581852	hypothetical protein
31.m00938	1.99714	0.0036957	ppg3, putative
57.m01792	1.99493	0.000508483	hypothetical protein
541.m01215	1.99471	0.00628029	DEAD/DEAH box helicase, putative
57.m03134	1.99039	0.000333652	hypothetical protein
76.m01555	1.98943	0.0299526	calcium/calmodulin-dependent protein kinase type II alpha chain, putative / calcium/calmodulin-dependent protein kinase type II delta chain, putative
76.m03425	1.98939	0.00917176	hypothetical protein
44.m02813	1.98651	0.00170099	serine/threonine-protein kinase, putative
583.m09195	1.98444	0.000328792	hypothetical protein
46.m00006	1.98376	0.000373366	ethylene inducible protein, putative
52.m01611	1.97735	6.17942e-05	GTP cyclohydrolase I, putative
65.m01198	1.97686	0.0170239	hypothetical protein
49.m03252	1.97588	3.61836e-05	hemolysin, putative
50.m03252	1.97268	0.00673015	hypothetical protein
55.m00101	1.97246	7.50091e-05	hypothetical protein, conserved
46.m01643	1.97062	0.00154447	hypothetical protein
72.m00688	1.97036	0.000123267	proteasome A-type and B-type domain-containing protein
76.m01579	1.96925	0.0061673	hypothetical protein
145.m00333	1.96813	6.49026e-06	cysteine desulfurase, putative
76.m01662	1.96773	0.00289	hypothetical protein
59.m03533	1.96681	0.0231168	hypothetical protein
83.m00002	1.96236	0.000106993	beta-ketoacyl synthase, putative
25.m01891	1.96155	0.0269176	hypothetical protein
641.m00010	1.96134	0.00104025	UDP-N-acetyl-D-galactosamine:polypeptide N-acetylgalactosaminyltransferase T3, putative
59.m06112	1.95977	0.000476014	gamma-glutamyl phosphate reductase, putative
55.m04637	1.95937	0.0204264	hypothetical protein
55.m05007	1.95871	0.00137981	ctr copper transporter domain-containing protein
42.m03458	1.95845	0.000157301	UDP-glucose 4-epimerase, putative
583.m05359	1.95833	0.000948044	phosphatidylinositol-4-phosphate 5-kinase, putative
65.m01091	1.95709	0.000899628	endoplasmic reticulum retention receptor, putative
76.m01698	1.95235	0.00645401	hypothetical protein
41.m00022	1.94944	0.000385139	hypothetical protein
44.m04672	1.94901	1.20703e-05	sepiapterin reductase, putative
59.m06062	1.94711	0.000895885	hypothetical protein
113.m01592	1.94513	0.00334851
52.m01685	1.94254	0.00339822	hypothetical protein
64.m00350	1.94182	0.000211334	aminoalcoholphosphotransferase
86.m00898	1.94171	0.0017182	hypothetical protein, conserved
65.m00004	1.94136	0.000259902	zinc finger DHHC domain-containing protein
583.m05563	1.94034	0.0399989	regulator of chromosome condensation domain-containing protein
25.m01820	1.93924	0.000248555	DNA ligase 1 precursor, putative
583.m00010	1.9392	0.00558997	Ca2+-ATPase
50.m03326	1.93877	0.0152847	mitochondrial carrier domain-containing protein
162.m00326	1.93752	7.52313e-05	hypothetical protein, conserved
113.m00807	1.93511	0.000267283	aspartyl aminopeptidase, putative
49.m00030	1.93471	2.59005e-05	TCP-1/cpn60 family chaperonin, putative
583.m00606	1.93463	3.45841e-06	hypothetical protein
49.m03248	1.93411	0.0414508	hypothetical protein, conserved
31.m00890	1.93356	0.00274966	WD repeat-containing protein
80.m02239	1.93222	0.000140882	hypothetical protein
50.m07138	1.92956	0.000108019	hypothetical protein
55.m00072	1.92915	2.30817e-05	UMP-CMP kinase, putative
65.m01195	1.929	0.000418334	WD-40 repeat myosin-like protein, putative
20.m03760	1.92805	0.00099369	serine/threonine-protein kinase, putative
33.m02212	1.92608	1.06682e-06	hypothetical protein
583.m05402	1.92591	0.00348089	hypothetical protein
145.m00604	1.92547	3.55697e-05	threonyl-tRNA synthetase, putative
44.m02678	1.92131	4.507e-05	tola protein., putative
59.m03591	1.92129	0.000384628	hypothetical protein
28.m00294	1.91888	0.0025018	hypothetical protein
59.m00091	1.91883	8.1168e-05	glyceraldehyde-3-phosphate dehydrogenase
25.m01896	1.91794	0.00268804	glutamic acid-rcih protein, putative
57.m01858	1.91747	3.40941e-05	zinc finger (C3HC4 RING finger) protein, putative
49.m00018	1.91442	5.52858e-06	emp24/gp25L/p24 family domain-containing, transmembrane protein, putative
44.m02654	1.91369	0.0148158	chromatin assembly factor 1 subunit, putative
35.m00919	1.91338	0.00306174	hypothetical protein
641.m02564	1.91267	0.0170201	rab proteins geranylgeranyltransferase component-related
50.m03306	1.91141	0.000913702	TPR domain-containing protein
52.m01575	1.91137	0.0161645	hypothetical protein, conserved
541.m02526	1.91066	0.000345571	hypothetical protein, conserved
31.m00931	1.91061	0.000613322	hypothetical protein, conserved
583.m05316	1.91045	0.00216657	alpha-N-acetylgalactosaminidase, putative
38.m01890	1.90963	0.00262018	DNA replication licensing factor, putative
42.m03360	1.9095	0.00153336	hypothetical protein
49.m05646	1.90738	0.00494784	fatty acyl-CoA desaturase, putative
50.m03108	1.90681	0.0102115	hypothetical protein, conserved
49.m07198	1.9058	0.000325217	hypothetical protein
50.m05668	1.90548	0.00826455
65.m00028	1.90517	3.39795e-05	26S proteasome AAA-ATPase subunit RPT1, putative
44.m04665	1.90394	0.0234692	cell wall protein-related
44.m02630	1.90302	0.000998281	phosphatidylcholine transfer protein, putative
57.m01764	1.90083	0.0422442	hypothetical protein
80.m02122	1.89971	1.84458e-05	hypothetical protein
57.m03994	1.89969	0.0420205	hypothetical protein
72.m00413	1.8987	0.000281903	hypothetical protein
113.m01286	1.89562	6.58094e-05	hypothetical protein
20.m03692	1.89503	0.000190921	mucin-related
55.m04954	1.89478	0.000486583	hypothetical protein
641.m01561	1.8933	9.18157e-06	bradyzoite surface antigen BSR4, putative
44.m04667	1.8927	0.000900871	CW-type zinc finger domain-containing protein
35.m00850	1.89196	0.00842015	hypothetical protein
583.m11427	1.89101	0.0023128	hypothetical protein, conserved
49.m03382	1.89	0.0048513	hypothetical protein
52.m01612	1.88646	0.00685902	ribosomal protein L15, putative
25.m01833	1.88538	0.000653245	retinitis pigmentosa GTPase regulator-related
55.m10300	1.8796	0.0476587	hypothetical protein, conserved
80.m02258	1.87746	0.00046244	hypothetical protein
59.m03486	1.87542	0.0053549	hypothetical protein, conserved
77.m00051	1.87532	0.00278994	hypothetical protein
80.m00050	1.87513	1.79671e-05	proteasome subunit beta type 1, putative
76.m01588	1.87401	0.00801539	hypothetical protein
31.m00912	1.87288	0.000770783	hypothetical protein
55.m10231	1.8722	7.48838e-05	NAD binding domain of 6-phosphogluconate dehydrogenase, putative
49.m03311	1.87118	0.0209456	hypothetical protein
49.m03123	1.87037	0.00952654	hypothetical protein
20.m00328	1.86757	0.00107681	hypothetical protein
76.m01557	1.86527	0.00102727	inorganic pyrophosphatase-like protein
41.m01358	1.86328	0.0017314	hypothetical protein
55.m00143	1.8632	0.0148932	centrin, putative
65.m01204	1.86262	1.32278e-05	hypothetical protein
542.m00227	1.861	0.024815	uridine phosphorylase, putative
46.m01712	1.85966	0.0108715	hypothetical protein tRNA-Leu
59.m03725	1.85908	3.87491e-06	hypothetical protein, conserved
44.m02696	1.85773	0.0038003	hypothetical protein
46.m01715	1.8569	0.00273924	hypothetical protein
583.m09116	1.85655	0.00795877	TPR domain-containing protein
52.m01587	1.85625	0.000907009	hypothetical protein, conserved
42.m00085	1.85569	0.00228024	hypothetical protein
55.m00175	1.85488	0.00236857	elongation factor Tu, putative
20.m05986	1.85468	0.00483709	formin-related protein
27.m01232	1.85411	0.000175836	hypothetical protein
583.m05444	1.854	7.35677e-05	FUN14 family domain-containing protein
59.m03592	1.85393	0.00322922	inhibitor-1 of protein phosphatase type 2A
583.m05586	1.8538	0.00121032	IQ calmodulin-binding motif domain-containing protein
25.m01884	1.85356	3.70259e-06	hypothetical protein
59.m07714	1.85301	0.00945869	hypothetical protein
641.m00172	1.85186	0.00500923	SF-assemblin-related
83.m02695	1.8516	0.00677037	hypothetical protein
583.m05739	1.85107	0.00014914	geranylgeranyl transferase type II beta subunit, putative
46.m01634	1.85099	0.000460804	transporter, putative
55.m00178	1.85094	0.00127363	hypothetical protein
52.m01583	1.85007	0.00533718	AP2
59.m03729	1.84995	0.000158933	protein kinase (incomplete catalytic triad)
76.m03393	1.84958	6.50639e-05	hypothetical protein, conserved
52.m00020	1.84936	0.0485318	hypothetical protein
541.m01182	1.8474	0.0100142	hypothetical protein
38.m00011	1.84705	0.000126235	phosphoserine aminotransferase, putative
55.m04696	1.84546	0.00411755	myosin head motor domain-containing protein
540.m00206	1.84535	0.000859677	ubiquitin-conjugating enzyme E2, putative
42.m00093	1.84517	0.00343177	hypothetical protein
86.m00376	1.84413	0.0143564	SET domain-containing protein
44.m02520	1.84384	5.0334e-05	hypothetical protein, conserved
65.m01152	1.84113	0.00154862	hypothetical protein
42.m03415	1.83932	0.000191009	hypothetical protein
55.m00011	1.83871	0.00224315	hydroxymethyldihydropterin pyrophosphokinase-dihydropteroate synthase
83.m01199	1.8365	0.00309578	hypothetical protein
46.m01642	1.83512	0.00223365	protein kinase
50.m00004	1.83355	0.000119796	proliferating cell nuclear antigen 1, putative
59.m03457	1.83186	0.00171707	serine/threonine protein phosphatase domain-containing protein
57.m00013	1.83038	0.0436167	GDP-fucose transporter 1, putative
50.m03351	1.82926	0.000353198	sperm-associated antigen 4 protein-related
80.m02279	1.82721	0.00161746	DNA mismatch repair protein, putative
57.m03104	1.82667	0.00281242	DNA-directed RNA polymerase I, putative
44.m00054	1.82422	0.000254329	nuclear transport factor 2 (ntf-2), putative
583.m05569	1.82357	3.46594e-05	hypothetical protein
551.m00439	1.82342	0.000274832	Gpi16 subunit, GPI transamidase domain-containing protein
641.m03147	1.82191	0.000365942	hypothetical protein
76.m01578	1.82191	0.0123553	hypothetical protein
42.m00087	1.82045	0.0172299	hypothetical protein
52.m00027	1.82028	6.08964e-05	hypothetical protein
50.m03153	1.81965	0.00576659	hypothetical protein
50.m03151	1.8194	0.000431587	hypothetical protein
42.m07423	1.81875	0.00820799	hypothetical protein
77.m00088	1.81726	9.57068e-06	TCP-1/cpn60 family chaperonin, putative
80.m02340	1.81724	4.50367e-05	nucleolar phosphoprotein (nucleolin), putative
50.m03131	1.81719	0.00766979	hypothetical protein
49.m03226	1.81636	0.0109857	coatomer alpha subunit, putative / COPA protein, putative
42.m03340	1.81506	0.0187104	phospholipid-transporting ATPase, putative
27.m00865	1.81405	0.0401908	GTP-binding protein engA-related
59.m06073	1.81398	0.0178806	hypothetical protein
57.m00036	1.81372	8.02259e-05	hypothetical protein, conserved
42.m07405	1.81368	0.00102903	hypothetical protein
25.m01842	1.81351	0.000571559	protein kinase, putative
57.m01712	1.8129	0.000623189	tubulin-specific chaperone-related
46.m00031	1.81225	0.0106018	aminomethyltransferase, putative
44.m00007	1.81148	0.00129539	diacylglycerol acyltransferase, putative
20.m03654	1.81003	0.0139594	hypothetical protein
49.m03321	1.80944	0.023142	hypothetical protein
583.m09099	1.80939	0.000502271	hypothetical protein
55.m04726	1.8089	0.00666845	mannose-1-phosphate guanylyltransferase, putative
541.m01192	1.80884	0.0379963	hypothetical protein
641.m03158	1.80772	0.012924	hypothetical protein
583.m05497	1.80715	0.00115511	mitogen-activated protein kinase, putative
57.m01876	1.80685	0.0115903	hypothetical protein
583.m00705	1.80662	0.00204722	cytochrome p450, putative
20.m05958	1.8056	0.000635088	hypothetical protein
55.m10245	1.80553	0.000959476	hypothetical protein
41.m00029	1.80321	1.6307e-06	glycolipid transfer protein-related
44.m05903	1.80172	0.0448819	hypothetical protein
42.m00098	1.80151	1.47293e-05	26S proteasome regulatory ATPase subunit, putative
42.m03288	1.79952	0.00387992	hypothetical protein, conserved
76.m01605	1.79951	0.000825048	hypothetical protein
129.m00256	1.79509	0.00296651	cleft lip and palate transmembrane protein 1-related
41.m01290	1.79247	0.000579295	hypothetical protein
80.m05039	1.79179	0.00916029	SRS domain containing protein
50.m03253	1.79015	5.51755e-05	hypothetical protein
50.m03222	1.79008	0.00216855	WD domain-containing protein
55.m10244	1.78971	0.0157753	hypothetical protein
46.m01701	1.78859	0.000177866	lysine decarboxylase domain-containing protein
541.m01159	1.78801	0.0219769	sodium/hydrogen exchanger, putative
74.m00455	1.78765	0.00136838	hypothetical protein
86.m00387	1.78527	0.00116223	TPR domain-containing protein
540.m00201	1.7831	0.000168481	eukaryotic peptide chain release factor subunit, putative
583.m05554	1.78287	9.5086e-05	26S proteasome non-ATPase regulatory subunit 2, putative
59.m03563	1.78263	0.00321114	KH domain-containing protein
44.m02636	1.77825	0.00329662	protein kinase, putative
72.m00386	1.77742	0.00280345	ubiquitin conjugation factor-related
50.m00068	1.77561	0.00215421	methionine aminopeptidase, putative
44.m02661	1.77534	1.15715e-05	oligosaccharyl transferase STT3, putative
145.m00607	1.7748	0.000170071	mitochondrial carrier domain-containing protein
38.m01056	1.77394	0.000138196	SF-assemblin, putative
583.m05764	1.77389	0.00802252	WD-40 repeats-containing protein
129.m00253	1.77351	0.000582651	pyruvate kinase, putative
50.m03175	1.77066	0.0187617	hypothetical protein
541.m02039	1.77028	9.67332e-06	histone H2B, putative
645.m00324	1.76954	0.0103747	hypothetical protein
50.m07113	1.76791	0.0164272	hypothetical protein
42.m00059	1.76705	0.00105228	histone H3 variant, putative
541.m02528	1.7663	0.0355572	choline/ethanolamine kinase domain-containing protein
49.m05650	1.76518	0.0381334	hypothetical protein
39.m00357	1.76496	0.0267352	FAD-depdendent monooxygenase, putative
49.m03152	1.76434	6.91411e-05	proteasome subunit alpha type 4, subunit
33.m01303	1.76404	0.00175219	ras-related protein, putative
55.m04650	1.76358	0.00316731	hypothetical protein, conserved
76.m03427	1.76159	0.0199334	hypothetical protein
55.m04896	1.76052	0.00180644	hypothetical protein
645.m00003	1.76031	7.56864e-05	beta-hydroxyacyl-ACP dehydratase
72.m00389	1.75996	0.000440756	hypothetical protein
42.m00060	1.75776	0.02209	hypothetical protein
59.m00092	1.75657	0.00379206	hypothetical protein, conserved
42.m03520	1.75601	0.00676164	hypothetical protein
49.m03213	1.75521	0.000875281	malaria antigen, putative
59.m03518	1.75252	2.75966e-05	asparaginyl-tRNA synthetase, putative
59.m03451	1.7502	0.00355141	hypothetical protein
641.m01560	1.74985	0.0106764	SAG1-related sequence 6 (SRS6), putative
50.m03166	1.74779	0.0072038	ATPase, AAA family domain-containing protein
20.m03753	1.74706	3.28162e-06	para-aminobenzoate synthase, putative
25.m01748	1.74693	0.0204788	peptide chain release factor 1, putative
583.m05525	1.74686	0.00743803	hypothetical protein
59.m00005	1.74647	0.000306332	protein transport protein Sec61 alpha subunit isoform 1, putative
583.m09192	1.74591	0.00054664	hypothetical protein
55.m10344	1.74572	0.00134705	hypothetical protein, conserved
41.m00031	1.74305	0.0127987	SPFH domain / Band 7 family domain-containing protein
42.m03597	1.74253	0.0256518	hypothetical protein
49.m03167	1.74221	0.000656604	phosphomannomutase 2, putative
59.m03413	1.73826	0.000110841	hypothetical protein
49.m03394	1.73787	0.0115944	hypothetical protein
83.m01262	1.73687	0.00146245	DEAD/DEAH box helicase, putative
59.m00079	1.73599	0.00039566	hypothetical protein
42.m07438	1.7339	0.00549927	trichohyalin, putative
583.m05406	1.7329	4.75349e-05	cation channel family domain-containing protein
583.m05509	1.73264	0.014352	hypothetical protein
583.m05420	1.72945	0.000989216	myosin light chain TgMLC1-related
583.m11466	1.72886	0.00295898	hypothetical protein
20.m03975	1.72621	0.00355978	hypothetical protein, conserved
69.m00143	1.72568	8.98704e-05	hypothetical protein
31.m00901	1.72366	0.000514217	hypothetical protein, conserved
59.m03503	1.72353	0.00380359	hypothetical protein
46.m03689	1.7234	2.39815e-05	hypothetical protein
55.m05044	1.72219	0.00366741	hypothetical protein
59.m07712	1.72219	0.0134355	hypothetical protein
49.m00037	1.72216	0.00640997	hypothetical protein
583.m05270	1.72037	0.0497996	hypothetical protein
583.m05378	1.71903	0.000232684	glycogen phosphorylase, putative
641.m02538	1.71889	0.000991471	hypothetical protein
59.m03471	1.71718	0.00712248	hypothetical protein
641.m01470	1.71694	1.05526e-06	transketolase, putative
37.m00737	1.71613	0.0210966	hypothetical protein
37.m00764	1.7156	0.0379674	ribosomal protein S6p-related
55.m04694	1.71533	0.00413208	hypothetical protein
55.m05063	1.71439	0.00355706	Na+/H+ exchanger, putative
50.m03267	1.71331	0.0325167	BRG1-associated factor, putative / actin-related protein, putative
31.m00869	1.71328	0.00233484	hypothetical protein
44.m02620	1.7125	0.034413	glutamic acid-rich protein, putative
57.m01699	1.71176	8.49719e-05	oxysterol-binding protein, putative
25.m02930	1.71037	0.00211749	hypothetical protein
583.m11445	1.70956	0.00201231	hypothetical protein, conserved
59.m03553	1.70933	0.00783703	vacuolar protein sorting-associated protein, putative
55.m04733	1.70819	0.00476122	DNA polymerase delta catalytic subunit, putative
55.m00216	1.70797	0.00214637	hypothetical protein
63.m00149	1.70683	0.0475271	hypothetical protein, conserved
52.m00009	1.70674	0.00241996	valyl-tRNA synthetase, putative
641.m00171	1.70502	0.00738328	proline synthetase co-transcribed protein, putative
57.m01709	1.70486	0.0076409	ubiquitin-activating enzyme-related
31.m00873	1.70437	0.00501003	sec1 family domain-containing protein
76.m01572	1.7038	2.03882e-05	ATP synthase, putative
20.m03895	1.70314	2.97323e-06	cleft lip and palate associated transmembrane protein 1, putative
583.m05709	1.70193	0.00098607	myosin regulatory light chain, putative
31.m00896	1.69985	0.0035784	hypothetical protein, conserved
59.m03717	1.69728	0.0453264	hypothetical protein
583.m05346	1.69616	0.0291104	WD domain, G-beta repeat-containing protein
49.m03412	1.69459	0.000501792	viral A-type inclusion protein repeat family
42.m00041	1.69416	0.00254619	hypothetical protein
46.m01650	1.69396	0.000295484	hypothetical protein
583.m05694	1.69396	0.000656048	hypothetical protein
20.m03798	1.69301	0.00351722	hypothetical protein, conserved
65.m01125	1.69215	0.00408573	nucleoside-triphosphatase, putative
25.m01846	1.69212	0.000679549	hypothetical protein
50.m03291	1.68956	0.01464	hypothetical protein
33.m02186	1.68849	0.0053672	yip1 domain-containing protein
52.m00029	1.68767	0.00103511	alpha-galactosidase A, putative
35.m00882	1.68756	0.000391742	proteasome subunit alpha type 3, putative
542.m00333	1.68672	7.75807e-05	hypothetical protein
50.m03327	1.6867	4.56921e-06	ATP synthase lipid-binding protein-related
541.m00142	1.68494	4.24384e-05	hypothetical protein
86.m00378	1.68472	0.000133587	hypothetical protein
540.m00198	1.68468	0.0468206	glutaredoxin domain containing protein
55.m08188	1.68368	0.000263065	hypothetical protein
50.m03210	1.6832	0.006516	hypothetical protein
59.m00090	1.68276	0.00390684	coatomer protein gamma 2-subunit, putative
74.m00465	1.68181	0.000243544	AP2
145.m00332	1.68089	0.0376622	hypothetical protein
59.m03714	1.68081	0.0363085	corA-like Mg2+ transporter domain-containing protein
55.m04741	1.67983	0.000757984	N-acetylglucosaminylphosphatidylinositol deacetylase, putative
42.m07433	1.67973	0.048209	hypothetical protein
50.m00069	1.67942	8.98928e-05	thioredoxin, putative
20.m03811	1.67864	0.00150159	hypothetical protein
38.m01040	1.67789	0.000317399	hypothetical protein
76.m01559	1.67751	0.0001578	leucine rich repeat protein, putative
49.m07245	1.67625	0.00242311	hypothetical protein
541.m01153	1.67576	0.00174199	hypothetical protein
583.m11399	1.67561	0.00550503	hypothetical protein, conserved
52.m03468	1.67455	0.000443327	hypothetical protein
83.m01192	1.67342	0.0211384	sybindin-like family domain-containing protein
55.m04989	1.67263	0.00834663	4-hydroxy-3-methylbut-2-en-1-yl diphosphate synthase, putative
35.m00901	1.67239	0.00418015	KH domain-containing protein
59.m03656	1.67085	1.94848e-05	phosphoglycerate mutase protein, putative
583.m05267	1.67078	0.00664525	sodium:solute symporter family domain-containing protein
49.m03170	1.67026	0.00316834	hypothetical protein
49.m05704	1.66981	0.0369563	trichohyalin, putative
64.m00329	1.6684	7.352e-07	clp ATP-binding chain B1, putative
645.m00331	1.66769	0.00428381	hypothetical protein
72.m00405	1.66592	0.000345585	signal peptidase, putative
80.m02317	1.66561	0.000247145	RER1 protein, putative
541.m00146	1.66466	0.00151963	hypothetical protein
49.m07217	1.66325	0.0273328	hypothetical protein
55.m00096	1.66287	0.00319213	hypothetical protein
44.m04668	1.66197	0.0347422	endonuclease/exonuclease/phosphatase domain-containing protein
583.m00625	1.66184	3.88172e-05	hypothetical protein, conserved
583.m05522	1.66013	0.0340737	hypothetical protein
50.m03248	1.65902	0.00236592	hypothetical protein, conserved
41.m02357	1.65861	0.016085	phosphoglycerate mutase family protein, putative
20.m03912	1.65699	0.000144116	elongation factor 2, putative
583.m09163	1.65561	6.22024e-06	hypothetical protein
83.m01295	1.65542	0.0191191	N-glycosylase/DNA lyase-related
46.m01625	1.65484	0.000219706	surface antigen 5-related
50.m00017	1.65398	1.38914e-05	proteasome subunit alpha type 5, putative
83.m01220	1.65386	2.15325e-05	hypothetical protein
31.m01822	1.65021	0.0173093	hypothetical protein
55.m04879	1.64945	1.842e-05	PH domain-containing protein
46.m01654	1.64877	0.020961	hypothetical protein
50.m03065	1.64665	0.000390996	hypothetical protein
20.m07757	1.6463	0.0182412	hypothetical protein
46.m01741	1.64506	2.14039e-05	hypothetical protein
42.m03560	1.64395	0.0250842	hypothetical protein
83.m01271	1.64257	0.000565509	mitogen-activated protein kinase-related
42.m03619	1.6421	0.00221806	phospholipase/carboxylesterase, putative
52.m01645	1.6408	0.00121491	hypothetical protein
44.m02603	1.64066	0.00724938	hypothetical protein
59.m03664	1.64064	0.00212733	SRS domain-containing surface antigen, putative
25.m01892	1.64011	0.00122035	syntaxin-related
20.m03673	1.63986	0.000235935	hypothetical protein
33.m00005	1.63952	2.76267e-05	rhoptry antigen ROP8
83.m01311	1.63878	0.000361707	hypothetical protein
50.m07095	1.63868	0.00675319	hypothetical protein
641.m01563	1.6378	0.0104952	bradyzoite surface antigen BSR4, putative
46.m00021	1.63768	0.000253488	nifU protein, putative
49.m05693	1.63765	0.000134369	hypothetical protein
50.m00003	1.63595	5.24867e-05	glutathione reductase, putative
74.m00439	1.63542	0.00637401	hydroxyacylglutathione hydrolase, putative
83.m01218	1.63533	0.000495222	hypothetical protein
80.m02298	1.63533	0.0015473	clathrin heavy chain, putative
50.m03358	1.6353	0.0067531	esterase-related
38.m01078	1.63371	1.86387e-05	proteasome subunit beta type 5, putative
44.m02700	1.6333	0.000106782	peptidase family T4, putative
55.m00010	1.63289	0.0128587	UDP-N-acetyl-D-galactosamine:polypeptide N-acetylgalactosaminyltransferase T1, putative
583.m09217	1.63257	0.00410264	hypothetical protein
65.m01089	1.63129	0.0203168	late embryogenesis abundant domain-containing protein
162.m00329	1.63112	0.032488	T-cell immunomodulatory protein-related
25.m01851	1.62949	0.000375907	glycylpeptide N-tetradecanoyltransferase, putative
583.m05280	1.62875	0.0016013	GTPase activating protein for Arf domain-containing protein
41.m01292	1.62604	0.0168037	hypothetical protein
541.m01166	1.62543	0.000282368	hypothetical protein
583.m05445	1.62492	0.00110975	hypothetical protein
80.m02131	1.62485	0.00355439	phospholipase A2 activating protein-related
162.m00332	1.62447	0.0075391	hypothetical protein
80.m02368	1.62417	0.0463072	hypothetical protein
583.m05397	1.62386	0.000288842	hypothetical protein
645.m00326	1.62334	0.000120825	cell division protein 48, putative
55.m04966	1.62334	0.000145453	gorasp2-prov protein
583.m11435	1.62325	0.00169516	hypothetical protein
583.m05366	1.62325	0.0175048	calcium/calmodulin-dependent 3', 5'-cyclic nucleotide phosphodiesterase, putative
33.m01336	1.6224	0.000695946	small GTP-binding protein sar1, putative
583.m11446	1.62159	0.0233482	hypothetical protein
50.m03318	1.62072	0.044054	histone deacetylase, putative
25.m00185	1.61984	0.0173084	double-stranded DNA-binding domain-containing protein
83.m00020	1.61978	0.000308924	translocation protein Sec62, putative
80.m00004	1.61907	0.00110313	mu1 adaptin, putative
57.m01765	1.61622	0.0184879	DNA-dependent protein kinase catalytic subunit-related
542.m00001	1.61595	2.432e-06	proteasome subunit beta type 7, putative
59.m03542	1.61556	0.00075999	hypothetical protein
55.m04854	1.61519	0.0184116	DnaJ domain-containing protein
583.m11433	1.61418	0.047563	hypothetical protein, conserved
59.m07795	1.61296	0.00471098	integrase/recombinase XerD-related
49.m03344	1.61225	0.0141406	hypothetical protein
37.m00783	1.61172	0.000142347	hypothetical protein, conserved
583.m05396	1.61094	0.0156902	WD domain, G-beta repeat-containing protein
41.m00036	1.61003	0.00208854	tubulin beta chain, putative
31.m00939	1.60951	0.00071308	hypothetical protein
55.m10262	1.60935	0.00410087	hypothetical protein
55.m04986	1.60897	0.0067601	WD domain, G-beta repeat-containing protein
52.m01619	1.60888	0.000162093	delta-aminolevulinic acid dehydratase, putative
42.m03387	1.60869	0.00953002	kinesin motor domain-containing protein
583.m05684	1.60671	0.0125073	hypothetical protein
49.m03279	1.60657	0.00114777	hypothetical protein
33.m01373	1.60579	3.97406e-05	AP2
80.m02192	1.60552	0.0216778	adapter-related protein complex 3 beta 2 subunit, putative
20.m03905	1.60345	0.00649888	hypothetical protein
50.m03401	1.60334	0.00741265	protease, putative
65.m01096	1.60249	0.0481605	sec23/Sec24 domain-containing protein
113.m00757	1.60236	0.0408171	kinesin motor domain containing protein
50.m03074	1.6003	0.00116632	hypothetical protein
50.m03135	1.59995	0.00412796	hypothetical protein
83.m01293	1.59964	0.00178273	hypothetical protein
59.m03645	1.59863	0.00117077	hypothetical protein
86.m00377	1.59739	0.000655136	zinc finger (CCCH type) protein, putative
41.m00016	1.59598	0.0341866	ubiquitin carboxyl-terminal hydrolase, putative
33.m01299	1.59432	0.00346015	hypothetical protein
55.m04830	1.59421	3.54242e-05	hypothetical protein
76.m01597	1.59155	0.00118234	hypothetical protein
20.m00367	1.59121	0.00108037	AP2
48.m00095	1.59103	0.000114046	hypothetical protein
65.m01197	1.59095	0.0013677	nucleoside-triphosphatase, putative
59.m03646	1.59079	0.0317998	peptidase family M3 domain containing protein
59.m07797	1.58729	0.00650552	hypothetical protein, conserved
38.m01057	1.58728	0.00488544	hypothetical protein
49.m07238	1.58726	1.15939e-05	hypothetical protein, conserved
25.m01837	1.58666	0.00256738	HECT-domain (ubiquitin-transferase) containing protein
86.m00653	1.5858	0.000156053	hypothetical protein
20.m03700	1.58567	0.00690429	hypothetical protein
55.m04597	1.58564	0.00132112	hypothetical protein
145.m00602	1.58546	0.0353526	hypothetical protein
52.m03447	1.58266	0.0234674	hypothetical protein
57.m01689	1.58263	0.000213689	hypothetical protein
57.m01851	1.58224	0.00684051	UDP-N-acetylglucosamine transporter, putative
25.m02950	1.58196	0.000220066	hypothetical protein
42.m03586	1.58096	0.00339796	mitochondrial import inner membrane translocase, putative
547.m00083	1.57927	0.0101386	CBS domain multi-pass transmembrane protein, putative
49.m00004	1.57881	2.31122e-05	adenosine transporter
59.m06105	1.5776	5.6072e-06	hypothetical protein
26.m00246	1.5775	0.00107522	high mobility group protein
44.m02644	1.57671	0.00108463	hypothetical protein
583.m00697	1.57649	0.00105303	prefoldin subunit 5, putative
113.m00788	1.57641	0.0382277	1-acyl-sn-glycerol-3-phosphate acyltransferase, putative
49.m05710	1.57548	0.0247604	hypothetical protein
641.m03167	1.57504	7.82915e-05	hypothetical protein, conserved
55.m08203	1.57501	0.00127674	hypothetical protein
55.m05014	1.5743	0.0394826	hypothetical protein
20.m00348	1.57341	0.000248852	rab GDP dissociation inhibitor alpha, putative
25.m01831	1.57316	0.000182429	ATP-dependent DNA helicase, putative
42.m00008	1.57162	3.83433e-06	adenosylhomocysteinase, putative
41.m01273	1.57137	0.0339672	ribosomal RNA large subunit methyltransferase J, putative
25.m00217	1.56927	3.33277e-05	proteasome PCI domain-containing protein
33.m01378	1.569	0.0457002	AP2
145.m00325	1.56869	3.26474e-05	TPR domain-containing protein
74.m00440	1.56849	0.0107321	neurofilament protein-related
86.m00396	1.56782	0.00221972	ubiquitin-conjugating enzyme E2, putative
37.m00784	1.56668	0.00147593	DNA polymerase alpha catalytic subunit
59.m03713	1.56651	0.00055589	10 kDa chaperonin, putative
64.m00353	1.56606	0.0252681	hypothetical protein
57.m01773	1.56538	0.00286434	hypothetical protein, conserved
55.m04761	1.5653	0.00273847	hypothetical protein, conserved
33.m02199	1.56466	3.64462e-05	translation initiation factor IF-2, putative
49.m03339	1.5644	0.0106546	serine/threonine-protein kinase, putative
55.m05070	1.5642	0.000928482	trichohyalin, putative
59.m03464	1.56331	0.024833	hypothetical protein
20.m03977	1.56267	0.00196764	hypothetical protein, conserved
44.m02604	1.56267	9.21508e-05	cyclophilin, putative
41.m01286	1.56133	0.000785122	hypothetical protein
50.m00021	1.56088	5.88286e-06	tyrosyl-tRNA synthetase, putative
44.m02569	1.56059	8.63993e-06	TCP-1/cpn60 family chaperonin, putative
80.m00095	1.56029	0.00247699	leucyl-tRNA synthetase, putative
583.m05562	1.55962	8.44133e-06	60S ribosomal protein L7a, putative
76.m01679	1.55879	0.008059	microneme protein, putative
44.m02555	1.55815	0.000192397	machado-joseph disease protein, putative
46.m01722	1.55812	0.000738321	transmembrane domain-containing protein
55.m00100	1.5579	0.0120257	zinc finger (C3HC4 RING finger) protein, putative
113.m00779	1.55783	0.00170352	beta-tubulin cofactor D-related
44.m02730	1.55756	0.00431286	FAD-depdendent monooxygenase, putative
44.m06355	1.55701	0.0012362	hypothetical protein
86.m00360	1.55698	0.0302618	hypothetical protein
42.m03359	1.55589	0.0170237	hypothetical protein
57.m01719	1.55367	0.00393962	hypothetical protein
49.m07226	1.55229	0.0474888	hypothetical protein
80.m02299	1.5518	0.00422665	starch binding domain-containing protein
20.m05977	1.55107	0.000272097	hypothetical protein
50.m05663	1.55029	0.0314449	hypothetical protein
76.m01547	1.55011	0.0179971	NLI interacting factor-like phosphatase domain-containing protein
583.m05407	1.54932	0.00219781	ubiquitin carboxyl-terminal hydrolase, putative
20.m03940	1.54873	0.00192064	hypothetical protein
50.m03315	1.54778	3.90859e-06	hypothetical protein
46.m01594	1.5468	0.00448176	neurofilament triplet M protein, putative
80.m02244	1.54676	0.000172317	transmembrane trafficking protein, transmembrane protein Tmp21 precursor, putative
72.m00385	1.5462	4.96588e-06	calmodulin, putative
44.m02633	1.5448	0.0148742	hypothetical protein, conserved
541.m00145	1.54439	0.00732238	hypothetical protein
20.m03984	1.54437	4.42153e-06	hypothetical protein
76.m01583	1.54401	0.000133441	hypothetical protein
33.m01343	1.54379	0.000312264	AP2
44.m02628	1.54293	0.0498552	myosin head motor domain-containing protein
44.m04679	1.54243	0.0049954	hypothetical protein
50.m03407	1.54132	0.00405748	ATPase, AAA family domain containing protein
50.m03110	1.54079	0.00227566	CRAL/TRIO domain-containing protein
583.m05487	1.54069	0.0119532	hypothetical protein
41.m00014	1.54064	0.000860692	coatomer delta subunit, putative
641.m01541	1.54054	0.00351145	hypothetical protein
44.m00017	1.54054	0.000241642	26S protease regulatory subunit 6b, putative
50.m00008	1.53893	0.000144721	cysteine proteinase, putative
145.m00603	1.53855	0.00664957	hypothetical protein
37.m00735	1.53828	0.0328917	hypothetical protein
80.m02201	1.53822	0.000399891	prefoldin subunit, putative
20.m03717	1.53789	0.0185796	hypothetical protein, conserved
44.m02546	1.5377	0.012871	hypothetical protein
57.m01700	1.53638	0.0130899	hypothetical protein
83.m01283	1.53579	0.000100529	armadillo/beta-catenin-like repeat-containing protein
33.m01377	1.53551	0.0061568	hypothetical protein
49.m03135	1.53512	5.82181e-05	hypothetical protein
113.m00786	1.53499	0.011436	hypothetical protein
55.m05072	1.53459	7.73588e-05	hypothetical protein
74.m00430	1.53422	0.016998	WD domain, G-beta repeat-containing protein
69.m00135	1.53168	0.000245665
76.m01668	1.52952	0.00230991	ribosomal protein S14p-related
42.m07435	1.52925	0.0200472	hypothetical protein
65.m01142	1.52886	0.0178481	OTU-like cysteine protease domain-containing protein
583.m00018	1.52863	0.000900675	uracil phosphoribosyltransferase
49.m03388	1.52801	0.00299416	hypothetical protein
57.m00003	1.52787	8.43494e-05	tubulin beta chain
44.m02760	1.52768	0.00598917	serine/threonine-protein kinase, putative / mitogen-activated protein kinase, putative
69.m00201	1.52632	4.38334e-06	hypothetical protein
641.m03155	1.52466	0.00355769	hypothetical protein
46.m01590	1.52419	4.51196e-05	glycine hydroxymethyltransferase, putative
541.m02053	1.52381	0.0447987	hypothetical protein
583.m05360	1.52365	0.00463193	myosin heavy chain-related
52.m00004	1.5234	4.46597e-05	integral membrane protein DUF6 domain-containing protein
52.m01634	1.5233	0.00190201	tryptophanyl-tRNA synthetase, putative
59.m00075	1.52244	4.27879e-06	RNA binding motif-containing protein
83.m02143	1.52198	0.0014413	sec1 family domain-containing protein
83.m01299	1.52197	0.0182408	leucine rich repeat protein, putative
33.m01287	1.52193	0.0279071	peptidase M16 inactive domain-containing protein / insulinase (peptidase family M16) domain-containing protein
76.m01690	1.52184	0.0377477	hypothetical protein
55.m08212	1.52032	0.0154774	methionine aminopeptidase, putative
31.m00866	1.5202	0.00202962	activator 1 36 kDa, putative
52.m01620	1.51983	0.00648617	hypothetical protein
59.m03515	1.51871	0.00668728	clathrin-associated adaptor complex small chan, putative
55.m00008	1.51864	0.00360651	UDP-N-acetyl-D-galactosamine:polypeptide N-acetylgalactosaminyltransferase T2
42.m00034	1.51673	0.000101322	adhesion regulating molecule, putative
65.m01140	1.51515	0.0126361	dolichol-phosphate mannosyltransferase, putative
59.m03724	1.51418	0.00124818	O-sialoglycoprotein endopeptidase-related
57.m01723	1.51382	0.012727	hypothetical protein
76.m01635	1.51375	0.0160114	glutamic acid-rich protein, putative
46.m03687	1.51359	0.00361131	hypothetical protein
57.m01861	1.51315	0.00925287	hypothetical protein, conserved
65.m02517	1.51263	0.000104406	hypothetical protein
46.m03683	1.51193	0.00105006	hypothetical protein
80.m03951	1.51078	0.00100594	hypothetical protein
583.m05373	1.51058	0.0167048	hypothetical protein
55.m08186	1.51036	0.00035147	hypothetical protein, conserved
72.m00677	1.50989	0.0365833	hypothetical protein
55.m04880	1.5098	0.0238854	hypothetical protein, conserved
59.m03651	1.50754	0.000546564	DNA-directed RNA polymerase III subunit, putative
583.m05272	1.50705	0.00715202	tRNA methyl transferase, putative
44.m02684	1.50665	0.000290542	ATP synthase gama chain, putative
42.m03567	1.50664	0.015801	hypothetical protein
583.m05652	1.50642	0.0110217	hypothetical protein
145.m00605	1.506	0.0114901	hypothetical protein
55.m04665	1.50549	4.60627e-05	glycyl-tRNA synthetase, putative
20.m08222	1.50544	0.000655737	hypothetical protein, conserved
65.m01190	1.50504	0.000702746	hypothetical protein
50.m00093	1.50492	7.40547e-05	C2 domain-containing protein
76.m01640	1.50401	1.55586e-06	prolyl endopeptidase, putative
41.m01297	1.50395	0.0300988	latency associated antigen
145.m00353	1.50394	0.000332093	endoplasmic reticulum oxidoreductin, putative
55.m11056	1.50373	9.33887e-05	hypothetical protein, conserved
76.m00005	1.50355	1.90046e-06	proteasome subunit alpha type 2, putative
38.m00008	1.50344	0.00217829	F-actin capping protein beta subunit, putative
42.m00038	1.50322	2.44371e-05	nnucleoredoxin, putative
80.m00088	1.50299	0.000189012	cytosol aminopeptidase
76.m00016	1.5026	0.018691	elongation factor 1-alpha, putative
59.m03689	1.50243	8.97084e-05	kinesin motor domain-containing protein
33.m02209	1.50239	0.000415585	serine/threonine protein phosphatase, putative
583.m11443	1.50233	0.00340044	sushi domain-containing protein / SCR repeat-containing protein
25.m00193	1.502	0.020182	capping protein alpha-like subunit, putative
76.m01610	1.50187	0.0451474	hypothetical protein
583.m05479	1.50185	0.0224003	hypothetical protein
20.m03853	1.50132	0.0110977	protein kinase domain-containing protein
42.m03474	1.49957	0.000695208	calmodulin beta (fragment)-related
50.m05646	1.49867	6.41772e-06	ras-related protein RAB7, putative
55.m04644	1.4986	0.00011453	protein kinase, putative
59.m00083	1.49685	0.0209503	insulysin, putative
49.m03397	1.49632	0.000583771	2-oxoglutarate dehydrogenase, putative
49.m00059	1.49623	0.00232829	DnaJ domain-containing protein
44.m02728	1.49561	0.0101837	brix domain-containing protein
33.m00007	1.49544	0.00366189	carbamoyl phosphate synthetase II
583.m05296	1.49542	0.026003	hypothetical protein, conserved
59.m03598	1.49523	0.0309065	DnaJ domain-containing protein
55.m00013	1.49506	0.000415924	histone H3
38.m00004	1.49456	0.00368361	ribosomal protein S9p-related
55.m04791	1.49423	0.0370905	hypothetical protein
55.m04742	1.49353	0.000166721	ras-related protein RAB1, putative
49.m00035	1.48998	0.00264425	hypothetical protein
583.m00645	1.48984	0.00310099	hypothetical protein
31.m00906	1.48923	0.0236101	molybdopterin synthase, putative
25.m02939	1.48922	0.00517861	hypothetical protein
46.m02866	1.48883	0.00113561	hypothetical protein
55.m00144	1.48842	0.00161912	hypothetical protein
59.m03381	1.488	0.0155519	hypothetical protein
20.m03742	1.48722	0.0235673	hypothetical protein
129.m00252	1.48721	0.00119712	sodium/hydrogen exchanger, putative
59.m03405	1.48604	0.000214436	hypothetical protein
50.m00040	1.48587	0.00150292	syntaxin, putative
65.m01967	1.48549	0.0121048	hypothetical protein
83.m01266	1.48536	0.000214338	myosin light chain TgMLC4, putative
583.m05735	1.48505	0.00730722	dynactin 4, putative
583.m05403	1.48479	0.00872404	hypothetical protein
55.m04603	1.48471	0.0372423	hypothetical protein
86.m00650	1.4847	0.00580343	hypothetical protein
65.m01158	1.4846	0.021063	prenyltransferase and squalene oxidase repeat domain-containing protein
50.m03332	1.48438	0.00177776	hypothetical protein
25.m02951	1.4843	0.000365125	formate/nitrite transporter-related
65.m02537	1.48393	0.00709745	hypothetical protein, conserved
33.m01304	1.48376	1.85566e-05	nudix hydrolase domain-containing, bis(5'-nucleosyl)-tetraphosphatase, putative
55.m04635	1.4827	0.00700667	pyridine nucleotide-disulphide oxidoreductase, putative
76.m01646	1.48253	0.00804818	GDP-L-fucose synthetase, putative
33.m01262	1.48231	0.007221	hypothetical protein
42.m03522	1.48225	0.0010572	hypothetical protein
46.m01721	1.48032	1.58455e-05	hypothetical protein
27.m01477	1.48024	2.53056e-06	Sec61beta family protein
20.m03837	1.48001	0.0239067	dolichyl-di-phosphooligosaccharide-protein glycotransferase, putative
80.m05026	1.47889	0.00292891	hypothetical protein, conserved
55.m00278	1.47875	0.00106412	hypothetical protein, conserved
59.m03595	1.47848	0.0193999	RNA methyltransferase
42.m03370	1.47809	0.036858	hypothetical protein
76.m01677	1.4763	1.49506e-05	heat shock protein-related
55.m00081	1.47504	6.59673e-05	proteasome subunit alpha type 7, putative
541.m01160	1.47499	0.0328678	corA-like Mg2+ transporter domain-containing protein
20.m03699	1.47496	0.0108492	hypothetical protein, conserved
59.m00030	1.47495	9.28832e-06	26S proteasome non-ATPase subunit, putative
80.m05394	1.47475	0.0033796	hypothetical protein
74.m00448	1.47472	0.00481962	hypothetical protein
42.m03294	1.47463	0.00584898	golgi SNARE protein-related
145.m00585	1.47451	0.00112009	archease-related
76.m01689	1.47432	0.00713107	kinesin central motor, putative
583.m00591	1.47337	0.000108791	fas apoptotic inhibitory molecule-related / lifeguard protein-related
80.m02333	1.47312	0.00203422	hypothetical protein
72.m00685	1.47261	0.00298772	hypothetical protein
20.m03756	1.47072	0.0168812	hypothetical protein, conserved
59.m00086	1.47042	0.000263139	transport protein particle (TRAPP) component, Bet3 domain-containing protein
57.m03110	1.46966	0.000834848	hypothetical protein
49.m03281	1.46919	0.000615999	proteasome subunit alpha type 6, putative
25.m01859	1.46917	0.00445	hypothetical protein
542.m00226	1.46916	0.000141374	hypothetical protein, conserved
59.m03590	1.46889	0.0398249	hypothetical protein
55.m04962	1.46868	0.0436096	DNA polymerase I, putative
52.m01670	1.4683	3.87915e-06	phospholipase/carboxylesterase domain containing protein
33.m01331	1.46785	0.00963071	hypothetical protein
49.m03319	1.46774	0.0197076	hypothetical protein
583.m05498	1.46753	0.000970434	hypothetical protein
20.m03718	1.46603	0.0151641	hypothetical protein
83.m02148	1.46581	0.000489678	eukaryotic translation initiation factor 3 subunit 8, putative
54.m00004	1.46565	0.000107926	cytochrome oxidase I
50.m03081	1.46545	0.000245884	hypothetical protein
49.m00047	1.46505	0.000109493	TCP-1/cpn60 family chaperonin, putative
42.m00121	1.46482	0.00120347	tubulin gamma chain, putative
59.m03460	1.46328	0.0381718	hypothetical protein
42.m03399	1.46278	0.000945757	hypothetical protein
28.m00293	1.46253	0.0462274	patatin-like phospholipase domain-containing protein
27.m00828	1.46022	0.0007958	hypothetical protein
59.m03643	1.46007	0.00334667	translation initiation factor eIF-2B epsilon subunit, putative
42.m00072	1.46005	1.71568e-05	syntaxin, putative
541.m01195	1.4591	0.000207943	calcyclin binding protein-related
44.m00026	1.45837	0.00451187	hypothetical protein, conserved
46.m01606	1.45754	0.0482527	ATPase, AAA family domain-containing protein
59.m03661	1.45731	8.18627e-05	cell division protein 48, putative
65.m00007	1.45625	0.00106059	protein phosphatase 2C, putative
583.m05548	1.45582	0.00220478	hypothetical protein
50.m03311	1.4557	0.000279751	exportin, putative
49.m03089	1.45509	0.000517147	26S proteasome non-ATPase regulatory subunit, putative
583.m05515	1.45302	0.00117739	hypothetical protein
55.m05020	1.45278	0.00109403	trypsin, putative
42.m07418	1.45256	0.0202823	hypothetical protein, conserved
25.m01835	1.45176	0.0330256	hypothetical protein
55.m05030	1.45115	0.000910434	26S proteasome non-ATPase regulatory subunit 1, putative
35.m01982	1.45086	0.0192437	homocitrate synthase 1-related
50.m03256	1.45065	0.00313826	hypothetical protein
641.m01549	1.45053	0.00197206	hypothetical protein
541.m00131	1.45048	0.00156937	hypothetical protein
74.m00769	1.45006	0.00261787	zinc finger (C3HC4 RING finger) protein, putative
25.m01827	1.4493	0.00152117	mitochondrial carrier domain-containing protein
42.m03519	1.44921	0.0185241	hypothetical protein
59.m03640	1.44822	0.0099448	hypothetical protein
25.m01902	1.44799	0.0102035	glycan synthetase, putative
46.m01720	1.44673	0.00549228	hypothetical protein
55.m00159	1.44584	0.000339928	nucleolar GTP-binding protein NGB, putative
645.m00329	1.44566	0.0019531	phosphatidylinositol glycan, class B-related
31.m01833	1.44537	0.00274637	metallothionein protein-related
50.m03093	1.44376	0.0296451	hypothetical protein
48.m00099	1.44356	0.000950874	hypothetical protein
42.m07431	1.44236	0.000139687	vacuolar (H+)-ATPase G subunit domain-containing protein
44.m02824	1.44195	0.0231574	poly(A)-specific ribonuclease-related
33.m01271	1.44134	7.8069e-06	hypothetical protein
41.m01380	1.44127	0.0407981	protein kinase domain-containing protein
49.m03127	1.44037	0.0210999	mitochondrial carrier domain-containing protein
20.m07354	1.43956	0.0491289	hypothetical protein, conserved
83.m01275	1.43946	0.00278281	hypothetical protein, conserved
55.m04877	1.43881	0.00634718	hypothetical protein, conserved
20.m05982	1.43802	0.00147863	hypothetical protein
41.m01270	1.43742	0.00192849	hypothetical protein
39.m00331	1.43665	0.0297417	calmodulin, putative
42.m00122	1.43647	7.38273e-05	glycogen debranching enzyme, putative
49.m00067	1.43646	0.00999957	flavoprotein domain-containing protein
86.m00003	1.43645	0.00428139	calcium-dependent protein kinase-related
25.m01889	1.43645	0.0158369	DNA repair helicase, putative
541.m01223	1.43584	0.0134481	hypothetical protein
583.m05341	1.43554	0.0186611	hypothetical protein
44.m02692	1.4351	0.00090541	hypothetical protein
55.m04666	1.43476	0.00454179	solute carrier family 13, putative
42.m00010	1.43458	2.2107e-05	hypothetical protein, conserved
583.m09207	1.43398	0.00848275	ankyrin repeat-containing protein
65.m01132	1.43343	0.044283	trypsin, putative
583.m05713	1.43312	0.0450397	hypothetical protein
50.m00095	1.43288	7.06671e-05	apolipoprotein A-I binding protein, putative
38.m01901	1.43206	0.0128475	hypothetical protein
76.m01551	1.43172	0.000144051	endomembrane domain-containing protein
42.m00026	1.43125	0.00462715	hypothetical protein
55.m00068	1.43033	0.000133401	aminoalcoholphosphotransferase, putative
25.m01796	1.42998	0.00261496	aldo/keto reductase family oxidoreductase, putative
59.m06080	1.42898	0.00265548	hypothetical protein
641.m01520	1.42896	1.46225e-05	transmembrane protein, putative
583.m00592	1.42867	0.00191922	succinyl-CoA ligase, putative
42.m03326	1.42851	0.00295415	hypothetical protein
55.m00146	1.42841	0.00101761	26S protease regulatory subunit 8, putative
55.m04968	1.4281	0.00266414	calmodulin, putative
641.m00189	1.42789	0.00104525	ABC transporter, putative
57.m01834	1.42684	5.88445e-06	aquaporin-related
42.m00088	1.42659	0.000833145	glutaredoxin, putative
57.m01727	1.42549	0.00155325	hypothetical protein, conserved
59.m03479	1.42545	0.000361841	protease-related
42.m03637	1.42284	0.0406324	protein kinase-PH domain-containing protein
49.m03399	1.42282	0.00104266	hypothetical protein
42.m03379	1.42259	0.0156758	hypothetical protein
64.m00324	1.42246	0.00188886	ubiquitin-transferase domain-containing protein
69.m00140	1.4224	0.00202435	proliferation-associated protein 2G4, putative
46.m01616	1.42105	0.00156074	hypothetical protein
50.m05691	1.42071	0.0217149	hypothetical protein
44.m00033	1.42019	0.037725	EH protein, putative
20.m07349	1.4188	0.0291715	hypothetical protein, conserved
52.m01596	1.41854	0.00382688	hypothetical protein
55.m04788	1.41854	0.00219992	rhoptry protein-related / protein kinase-related
49.m03216	1.41786	0.0244948	hypothetical protein
72.m00396	1.41779	0.00105093	signal recognition particle protein, putative
42.m03309	1.41701	0.00160997	hypothetical protein, conserved
80.m02225	1.41681	0.00129852	adipocyte plasma membrane-associated protein-related
55.m04752	1.41601	0.00184257	hypothetical protein
42.m03606	1.41576	0.000899103	phosphatidylcholine transfer protein-related
583.m05419	1.41561	0.0323439	hypothetical protein
27.m00864	1.41509	0.0449902	hypothetical protein
42.m03523	1.41334	0.0157931	translin, putative
41.m02358	1.4131	5.33727e-05	hypothetical protein
74.m00460	1.41269	8.93277e-06	hypothetical protein
57.m01850	1.4124	0.00069744	kinesin motor domain-containing protein
41.m01295	1.41213	0.00541645	actin-related
31.m00863	1.41205	0.0192963	ADP-ribosylation factor domain-containing protein
59.m03414	1.41192	0.000790691	citrate synthase, putative
583.m05351	1.41175	0.0221043	U3 small nucleolar ribonucleoprotein protein, putative
44.m02627	1.41133	8.91887e-06	hypothetical protein
42.m00119	1.41013	0.034025	hypothetical protein, conserved
49.m05667	1.40967	0.00774179	hypothetical protein
583.m09205	1.40943	0.000567387	hypothetical protein
44.m04690	1.40883	0.000591973	transaldolase, putative
20.m03823	1.40847	0.0294116	hypothetical protein
44.m04628	1.40762	0.0305984	kinesin heavy chain-related
583.m05477	1.40753	0.0174538	AAA family ATPase, putative
55.m04681	1.40745	0.000141856	hypothetical protein
49.m03336	1.40675	0.0159323	hypothetical protein
583.m00659	1.40581	0.00362184	endonuclease/exonuclease/phosphatase domain-containing protein
583.m05485	1.40463	0.00407108	hypothetical protein
59.m07713	1.40393	0.0325702	hypothetical protein, conserved
80.m02250	1.40393	0.00665993	hypothetical protein, conserved
42.m03444	1.40345	0.00231725	hypothetical protein
59.m03441	1.40336	0.000160357	26S proteasome regulatory subunit, putative
25.m01847	1.40306	0.000208562	mRNA decapping enzyme, putative
46.m02889	1.40268	7.47815e-05	hypothetical protein
41.m01308	1.40267	0.0293244	hypothetical protein, conserved
50.m00057	1.40234	1.73108e-05	hypothetical protein
20.m03907	1.40141	0.00053879	fructose-1,6-bisphosphatase, putative
46.m01671	1.39982	0.00131981	apoptosis-regulating basic protein, putative
20.m05981	1.39956	0.00641043	hypothetical protein
80.m02304	1.39946	0.00819023	IQ calmodulin-binding motif domain-containing protein
8.m00184	1.39941	0.000236032	tropomyosin-related
41.m01376	1.39927	0.00632473	phosphoglycerate mutase family protein
35.m01595	1.39837	0.0039383	inner membrane complex protein (IMC3)
49.m03099	1.39774	0.0141647	hypothetical protein, conserved
44.m02614	1.39735	0.0113615	200 kDa antigen p200-related
52.m01602	1.39727	0.00155991	DnaJ domain-containing protein
80.m02241	1.3966	0.00565777	biotin-[acetyl-CoA-carboxylase] ligase, putative
641.m00176	1.39649	0.00139024	hypothetical protein
42.m03386	1.39643	0.0128648	hypothetical protein
145.m00586	1.39574	0.00171111	hypothetical protein
52.m01551	1.39538	0.0102866	hypothetical protein
46.m01740	1.39397	0.000754222	hypothetical protein
42.m03498	1.39307	0.000152072	reticulon domain-containing protein
26.m00370	1.39249	0.000451871	hypothetical protein
69.m00142	1.3912	0.000106942	glutaredoxin-related
35.m00869	1.39032	0.00299305	hypothetical protein
33.m01364	1.38923	0.0026331	SNARE protein, putative
33.m01292	1.38919	0.00984896	hypothetical protein
64.m00352	1.38834	0.00103117	hypothetical protein
49.m03333	1.38779	0.00315632	myosin, putative
55.m04617	1.38767	0.00552842	hypothetical protein
38.m01064	1.38753	0.0142402	GTPase domain-containing protein
80.m02141	1.38733	0.0097904	UBX domain-containing protein
59.m06121	1.38663	0.00437486	hypothetical protein, conserved
65.m01161	1.38622	0.000803822	WD-40 repeat-containing protein
41.m01311	1.3862	0.00334922	ppg3, putative
50.m00058	1.38617	5.74022e-06	thioredoxin, putative
541.m01230	1.38615	7.09636e-06	dynein gamma chain, putative
55.m04634	1.38615	0.0286093	hypothetical protein
42.m03440	1.38555	0.00183268	hypothetical protein
50.m03360	1.385	0.00204321	TBC domain-containing kinase (incomplete catalytic triad)
80.m03969	1.38467	0.0405558	BNR/Asp-box repeat domain-containing protein
44.m02710	1.38373	0.00124913	hypothetical protein
33.m01315	1.3834	0.00952316	hypothetical protein
583.m09197	1.38281	0.0191713	hypothetical protein
44.m02735	1.38267	0.00364246	patatin-like phospholipase domain-containing protein
645.m00320	1.38265	0.000433353	WOS2 protein (p21), putative / telomerase-binding protein p23, putative
583.m05466	1.38123	0.0364683	hypothetical protein
35.m00930	1.38085	0.0213244	hypothetical protein
641.m00178	1.38079	0.000744981	ubiquinol-cytochrome c reductase, putative / Rieske iron-sulfur protein, putative
33.m02687	1.38056	0.0212401	hypothetical protein
113.m00012	1.38027	0.000139324	TCP-1/cpn60 family chaperonin, putative
583.m05596	1.37962	0.0094666	cytochrome c heme lyase, putative
541.m02067	1.37885	0.00604487	hypothetical protein
25.m01848	1.37776	0.0367969	regulator of chromosome condensation (RCC1) domain-containing protein
59.m00041	1.37755	0.0192153	hypothetical protein, conserved
52.m01564	1.37626	0.00906545	hypothetical protein
42.m00065	1.37624	0.000168345	ATP synthase, putative
41.m01362	1.37447	0.0433409	hypothetical protein, conserved
49.m00062	1.37391	0.000169572	coatomer epsilon subunit, putative
583.m05526	1.37382	0.00587271	hypothetical protein
583.m09172	1.37343	0.00232996	hypothetical protein
42.m07413	1.37304	0.00122996	hypothetical protein
59.m00040	1.37234	0.000688395	folylpolyglutamate synthase, putative
59.m00048	1.37229	0.000692157	hypothetical protein
583.m05409	1.37221	0.00057708	hypothetical protein
49.m03134	1.37089	0.000336699	histone H4, putative
541.m01146	1.3701	0.00353159	guanylate binding protein, putative
55.m04605	1.36988	0.000626709	NOL1/NOP2/sun family domain-containing protein
42.m03365	1.36964	0.00965589	IQ calmodulin-binding motif domain-containing protein
25.m01903	1.36935	0.0101578	protein kinase domain-containing protein
50.m05666	1.36764	0.0312044	hypothetical protein
49.m00005	1.36672	0.00212447	beta adaptin protein, putative
55.m04783	1.36669	0.000151508	hypothetical protein
42.m05844	1.3662	0.0292256	hypothetical protein
25.m00001	1.36611	0.0190313	phosphatidylinositol synthase, putative
39.m00334	1.36451	0.0147157	L-type amino acid transporter-related
42.m00020	1.36413	2.06831e-05	proteasome component PRE3 precursor, putative / proteasome subunit beta type 6 precursor, putative
42.m00021	1.36353	0.0396208	hypothetical protein
42.m03485	1.36227	0.0372199	hypothetical protein
33.m01272	1.36222	0.00643337	alpha-glucan water dikinase 1, putative
83.m01250	1.36194	1.2924e-05	hypothetical protein
42.m03615	1.36193	0.00217341	hypothetical protein
41.m02956	1.36138	0.00625208	hypothetical protein
83.m01186	1.36101	0.0155304	hypothetical protein
80.m05036	1.36079	0.00128467	hypothetical protein, conserved
35.m00883	1.36003	0.00283999	hypothetical protein
44.m00030	1.35962	2.85319e-06	hypothetical protein, conserved
42.m00027	1.35927	0.0219349	26S proteasome non-ATPase regulatory subunit 4, putative
57.m01848	1.3588	0.0247204	small nuclear ribonucleoprotein, putative
42.m00091	1.35854	0.00168037	hypothetical protein
583.m09102	1.35839	0.000409513	hypothetical protein
55.m10315	1.3579	0.00115836	hypothetical protein
50.m03143	1.35713	6.07588e-05	hypothetical protein
55.m05086	1.3568	0.0016045	hypothetical protein
42.m03617	1.35496	0.0460055	elongation factor Tu GTP-binding domain-containing protein
76.m01674	1.35447	0.00146998	hypothetical protein
86.m00373	1.35344	0.00396489	hypothetical protein
145.m00322	1.35344	0.000344111	cysteinyl-tRNA synthetase, putative
59.m00062	1.35316	0.00730648	SWIB/MDM2 domain-containing protein
59.m03564	1.35244	0.0192409	hypothetical protein
33.m02668	1.35184	2.39775e-05	intracellular protease, putative
55.m08219	1.35034	0.000451846	Rhoptry kinase family protein ROP16
59.m03648	1.34936	0.00162389	hypothetical protein
41.m01285	1.34782	0.00427524	2OG-Fe(II) oxygenase family oxidoreductase, putative
65.m01108	1.34761	0.00280611	hypothetical protein
8.m00002	1.3474	0.000126614	hypoxanthine-xanthine-guanine phosphoribosyl transferase
46.m03667	1.34652	0.00238194	hypothetical protein
129.m00260	1.34609	0.00187014	transport protein particle (TRAPP) component, Bet3, putative
49.m05727	1.34458	0.0162694	hypothetical protein
80.m00020	1.3441	0.0366309	pyridine nucleotide-disulphide oxidoreductase, putative
33.m01338	1.34391	0.0013142	hypothetical protein
59.m00071	1.34301	0.00164973	nucleolar protein family A, putative
57.m00001	1.34287	2.40639e-05	hexokinase
583.m05418	1.34228	0.00948179	DnaJ domain-containing protein
44.m04617	1.34205	0.0450285	hypothetical protein
113.m00774	1.34202	0.00250996	hypothetical protein
86.m00381	1.34108	0.0187342	hypothetical protein
44.m02802	1.34087	0.0109358	ATP-dependent RNA helicase, putative
44.m02750	1.34038	0.00388634	hypothetical protein
52.m02717	1.34005	0.000581609	hypothetical protein
49.m03372	1.33974	0.000928726	long-chain fatty acid CoA ligase, putative
59.m03439	1.33875	0.0154777	crooked neck-like protein 1, putative
50.m03208	1.33871	0.0329161	hypothetical protein
80.m02359	1.33861	0.00940659	26S proteasome non-ATPase regulatory subunit, putative
55.m04663	1.33823	0.000505539	vacuolar ATP synthase, putative
162.m00319	1.33724	0.0354923	hypothetical protein
59.m03444	1.33628	0.00376442	hypothetical protein
44.m02549	1.33615	0.0189693	hypothetical protein, conserved
49.m03262	1.33453	0.0243791	C2 domain-containing protein
583.m00022	1.33425	0.00503247	tubulin alpha chain
55.m00099	1.33382	0.00200673	OTU-like cysteine protease domain-containing protein
76.m00019	1.33357	0.00391459	MA3 domain protein
46.m01607	1.33327	0.000204784	aminotransferase, putative
42.m03475	1.33324	0.0247027	hypothetical protein
33.m01393	1.33319	0.0179293	hypothetical protein
42.m00106	1.33275	0.00202493	hypothetical protein, conserved
20.m00355	1.33167	0.0066756	protein phosphatase 2C, putative
20.m03931	1.33158	0.00260056	lysyl-tRNA synthetase, putative
55.m04837	1.3313	0.0461985	zinc finger (C2H2 type) protein, putative
44.m00047	1.33122	0.000139776	hypothetical protein
46.m01622	1.33062	0.028251	PHD-finger domain-containing protein
55.m04807	1.32994	0.0164295	hypothetical protein
65.m01122	1.32991	0.00257641	hypothetical protein
52.m01665	1.32969	0.000752519	ubiquitin, putative
583.m09194	1.32835	0.00281833	protein tyrosine phosphatase-like domian-containing protein
50.m05632	1.32783	0.0120524	dimethyladenosine transferase, putative
20.m05880	1.32715	0.000747733	protein phosphatase 2C, putative
583.m05430	1.32677	0.000941627	WD-40 repeat-containing protein
83.m01184	1.3261	0.0019355	heat shock protein 90, putative
20.m03941	1.32583	0.00485164	cytochrome c oxidase assembly protein (heme A: farnesyltransferase), putative
49.m03087	1.32514	0.00029417	hypothetical protein
42.m03524	1.32498	0.00436817	aconitate hydratase, putative
583.m00609	1.32495	0.00544076	hypothetical protein
83.m01309	1.3247	0.0268644	ATP-dependent helicase, putative
25.m00005	1.32434	0.000465443	50S ribosomal protein L28, putative
50.m00026	1.32376	0.000698057	cytochrome C1, putative
50.m03198	1.32345	0.0398021	RNA methyltransferase, TrmA family, putative
20.m05976	1.32333	0.00020361	hypothetical protein
42.m03576	1.32214	0.0106347	aggrecan core protein-related
59.m03655	1.3216	0.00131213	TCP-1/cpn60 family chaperonin, putative
641.m01485	1.32138	6.90083e-05	hypothetical protein
33.m01398	1.32105	0.000360151	rhoptry antigen, putative
74.m00446	1.32074	0.0115444	surface antigen, putative
80.m02267	1.32072	0.00669817	ubiquitin-activating enzyme E1, putative
50.m00005	1.32055	0.00176277	fructose-1,6-bisphosphatase, putative
49.m00017	1.32028	0.0378718	hypothetical protein
27.m00832	1.32004	0.0340937	arginyl-tRNA synthetase, putative
80.m00089	1.31957	0.000544981	patched transmembrane domain-containing protein
49.m05695	1.31892	0.00627357	hypothetical protein
65.m01192	1.31858	0.0245956	F-box domain-containing protein
59.m03616	1.31812	0.00109637	radical SAM domain-containing protein
76.m02653	1.31808	0.0332723	hypothetical protein
42.m00024	1.31717	0.00101669	acyltransferase-related
59.m03502	1.31699	0.00361196	hypothetical protein
35.m00871	1.31669	0.00301624	hypothetical protein
65.m01138	1.31531	0.0132413	thrombospondin type 1 domain-containing protein
59.m03666	1.31521	0.000311924	radical SAM domain-containing protein
55.m08198	1.315	1.93685e-05	porin, putative
55.m04843	1.31472	0.000677066	hypothetical protein
50.m05651	1.31372	0.00664457	surface protein PspC-related
113.m00009	1.31322	0.00171547	hypothetical protein, conserved
42.m00016	1.31303	0.00460233	vacuolar type H+-ATPase proteolipid subunit, putative
38.m00018	1.31297	0.00153708	protein arginine N-methyltransferase 4, putative
50.m03254	1.31243	0.0016876	hypothetical protein, conserved
59.m06097	1.31159	0.0477345	small nuclear ribonucleoprotein, putative
49.m07251	1.31145	0.00415305	potassium channel tetramerisation domain containing protein
35.m01594	1.31144	0.0270281	hypothetical protein
20.m03963	1.31051	0.00465606	formin-related protein
55.m08200	1.30919	0.000318772	hypothetical protein
80.m02262	1.30917	0.0208191	protein serine/threonine phosphatase-related / sortilin-related
46.m03688	1.30902	0.0323001	hypothetical protein, conserved
44.m04680	1.30886	0.0049808
113.m00804	1.30869	0.00140642	hypothetical protein
57.m00006	1.30842	0.0060889	ras-related protein RAB5, putative
49.m03175	1.30765	0.00175446	hypothetical protein
583.m05738	1.3069	0.00121721	hypothetical protein
57.m01682	1.30476	8.0916e-05	ADP-ribosylation factor
50.m03141	1.30455	0.0135072	calmodulin-related
50.m03331	1.30442	0.0181459	hypothetical protein
25.m02954	1.30405	0.00480435	gamma-tubulin complex component 4-related
50.m03209	1.30397	0.0026365	hypothetical protein
25.m03610	1.30395	0.00989487	hypothetical protein
42.m03409	1.303	0.00153324	hypothetical protein
42.m03421	1.30253	0.00587255	hypothetical protein, conserved
49.m03277	1.30249	0.00321193	protein kinase domain-containing protein
583.m00694	1.30239	0.00350019	protein of unknown function domain-containing protein
42.m07415	1.30217	8.99376e-05	hypothetical protein, conserved
20.m03971	1.30202	0.00543543	hypothetical protein
38.m01114	1.30144	0.00560552	hypothetical protein
46.m01763	1.30133	0.00630526	armadillo/beta-catenin-like repeat-containing protein
57.m01857	1.30129	3.39912e-05	DnaJ domain-containing protein
20.m00379	1.30117	1.09653e-05	paired amphipathic helix protein sin3b-related
57.m01799	1.30104	0.00537452	hypothetical protein
583.m09169	1.30073	0.000521144	small nuclear ribonucleoprotein E/G, putative
583.m00002	1.30051	0.00119648	peroxidoxin 2
20.m03901	1.29971	0.0252184	hypothetical protein
59.m06106	1.29962	0.0075599	bicoid-interacting (Bin3) domain-containing protein
52.m01650	1.29936	0.0215114	50S ribosomal protein l2, putative
35.m00029	1.29935	0.00271659	hypothetical protein, conserved
35.m00867	1.29886	1.13424e-05	hypothetical protein
50.m07137	1.29844	0.0329981	hypothetical protein, conserved
44.m00004	1.29819	0.00447987	membrane skeletal protein IMC1
44.m02798	1.29801	0.00777144	hypothetical protein
20.m00349	1.2979	0.00336704	TCP-1/cpn60 family chaperonin, putative
59.m00072	1.29755	0.00126931	hypothetical protein
49.m03149	1.29735	0.00685609	serine/threonine-protein kinase-related / NimA-related protein kinase-related
72.m00407	1.29702	0.0352211	ubiquitin-conjugating enzyme E2, putative
38.m01100	1.29615	5.85813e-05	glutathione reductase, putative
145.m00351	1.29602	0.0173827	molybdopterin cofactor sulfurase-related
46.m01675	1.29598	0.0126242	dynein 1-beta heavy chain, flagellar inner arm I1 complex, putative
55.m00188	1.29572	0.000354205	hypothetical protein
44.m00031	1.29538	0.00212966	membrane skeletal protein IMC1, putative
44.m02591	1.2951	0.000234674	protein translocation complex, SEC61 gamma subunit, putative
42.m08073	1.29485	0.023044	hypothetical protein
42.m03456	1.29415	0.00130824	hypothetical protein
80.m02287	1.29262	0.0153953	hypothetical protein, conserved
641.m00188	1.29217	0.0102805	hypothetical protein, conserved
74.m00458	1.29178	0.000235108	hypothetical protein
41.m01375	1.29139	0.030414	phosphoserine phosphatase, putative
76.m01589	1.29124	0.0204508	hypothetical protein
41.m03144	1.28986	0.0028598	hypothetical protein, conserved
83.m01216	1.28956	0.000852976	molybdopterin biosynthesis MoeA protein, putative
83.m01206	1.28843	0.00210662	ran-specific GTPase-activating protein, putative
44.m02557	1.28726	0.0122912	thiF family domain-containing protein
42.m03584	1.28555	0.00191179	Rhoptry kinase family protein ROP11 (incomplete catalytic triad)
46.m00023	1.28508	4.55178e-05	KH domain-containing protein
57.m01816	1.2844	0.0310305	3-demethylubiquinone-9 3-methyltransferase, putative
20.m00365	1.28415	0.0404502	nucleolar protein NOP5, putative
74.m00432	1.28409	0.0212542	ribonuclease HI large subunit, putative
583.m00004	1.28403	0.00758947	RAB6 protein
20.m03932	1.28289	0.00117962	adenosine deaminase-related
41.m01315	1.28272	0.017046	cell division control protein 68, putative
49.m00021	1.28208	0.0196626	hypothetical protein
541.m01217	1.28199	0.000527007	hypothetical protein
72.m00395	1.28195	0.00546382	histidyl-tRNA synthetase, putative
611.m00038	1.28169	2.70136e-05	eukaryotic translation initiation factor 3 subunit 7, putative
31.m00913	1.28122	0.0430889	zinc finger (CCCH type) protein, putative
44.m02525	1.27943	0.00385887	importin beta-3 subunit, putative
41.m01353	1.27928	0.0102018	U6 snRNA-associated Sm-like protein LSm1, putative
35.m00023	1.27842	0.00623342	hypothetical protein, conserved
44.m00037	1.27797	0.000150677	serine-threonine phosophatase 2C
645.m00312	1.27768	0.0491668	recA-like protein
42.m00081	1.27761	0.00208751	NAD-dependent deacetylase, putative
33.m01301	1.27642	0.00330396	hypothetical protein
49.m00027	1.27642	0.00749595	D-3-phosphoglycerate dehydrogenase, putative
33.m01286	1.27548	0.0290248	hypothetical protein
31.m00878	1.27527	0.00107705	small nuclear ribonucleoprotein F (snRNP-F), putative
49.m00063	1.27521	0.00141675	hypothetical protein, conserved
541.m01235	1.27362	0.0284074	hypothetical protein
41.m00008	1.27298	0.0306353	peptidase family M48 domain-containing protein
542.m00334	1.2728	0.000835993	PUA domain-containing, nucleolar protein (NOL1/NOP2/sun family), putative
583.m09142	1.27224	0.0199253	hypothetical protein
74.m00437	1.27178	0.0225606	protein phosphatase 2C, putative
35.m00004	1.27138	0.000683577	hypothetical protein, conserved
55.m00092	1.27092	0.000282129	rhoptry protein 6
42.m00064	1.27088	0.00988099	50s ribosomal protein L13, putative
39.m00350	1.27061	0.00825051	pfs77-related
583.m00692	1.27018	0.000770439	protein of unknown function domain-containing protein
74.m00436	1.27011	0.014305	hypothetical protein
583.m11448	1.269	0.00204629	hypothetical protein, conserved
50.m00009	1.26874	0.00138774	ADP/ATP carrier, putative
641.m01491	1.26759	0.00603555	3-methyl-2-oxobutanoate dehydrogenase [lipoamide] kinase, putative
59.m03642	1.26742	0.00818011	hypothetical protein
37.m00748	1.26696	8.02817e-05	hypothetical protein
20.m03728	1.26623	0.038255	NLI interacting factor-like phosphatase domain-containing protein
57.m01687	1.26613	0.0473677	AP2
39.m00353	1.26562	0.0257813	hypothetical protein
74.m00451	1.26552	0.03716	pyrazinamidase/nicotinamidase, putative
65.m01972	1.26541	0.00327648	ubiquitin-conjugating enzyme E2, putative
44.m02615	1.26478	0.0461121	ATPase, AAA family domain-containing protein
44.m02726	1.26449	0.0024532	DNA repair protein RAD54 homolog, putative
44.m02701	1.26431	0.00133066	hypothetical protein, conserved
542.m00221	1.26411	0.0389131	phenylalanyl-tRNA synthetase beta chain, putative
49.m05685	1.26398	6.98212e-05	hypothetical protein
20.m03755	1.26272	0.00261554	hypothetical protein
86.m00397	1.26256	0.00203663	phosphatidylinositol 3- and 4-kinase domain-containing protein
52.m01529	1.2619	0.00139446	zinc finger DHHC domain-containing protein
69.m00139	1.26164	0.000161099	hypothetical protein, conserved
46.m01734	1.2613	0.0216474	hypothetical protein
41.m02953	1.26111	0.00233196	hypothetical protein
44.m02808	1.25879	0.00129352	hypothetical protein
55.m04911	1.25843	0.000691001	hypothetical protein
645.m00685	1.25838	0.0033594	hypothetical protein
49.m05669	1.25765	0.0295657	glyoxalase, putative
583.m00622	1.25694	0.000723472	hypothetical protein, conserved
46.m03702	1.2568	0.0158561	Signal recognition particle 9 kDa protein, putative
49.m05671	1.25575	5.87351e-05	hypothetical protein
641.m03151	1.25575	0.0149815	hypothetical protein, conserved
46.m01726	1.25509	0.00744483	hypothetical protein, conserved
113.m00773	1.25466	0.0186819	hypothetical protein, conserved
80.m02134	1.25393	0.0217326	hypothetical protein
42.m03570	1.25392	0.0135335	lytB domain-containing protein
129.m00263	1.25378	0.0213271	hypothetical protein
641.m01477	1.25364	0.00217276	hypothetical protein
541.m01140	1.25352	0.00154686	glycerol-3-phosphate dehydrogenase-related
50.m03330	1.25352	0.0186248	fas apoptotic inhibitory molecule-related / lifeguard protein-related
52.m01598	1.25345	0.01312	hypothetical protein
50.m00049	1.25312	0.00448368	actin, putative
25.m00219	1.25211	0.000178057	pyridine nucleotide-disulphide oxidoreductase domain-containing protein
46.m01611	1.25113	0.00118435	phenylalanyl tRNA synthetase isoform, putative
59.m03514	1.25074	0.00707038	hypothetical protein
52.m02682	1.25042	0.00447727	GPI-anchor transamidase, putative
57.m00034	1.25002	0.00288042	hypothetical protein, conserved
83.m02145	1.24995	0.00468734	rhoptry antigen, putative
41.m00021	1.2493	2.19982e-05	articulin 4
59.m03606	1.24877	0.00784692	kelch motif domain-containing protein
49.m00052	1.24861	9.31309e-05	nucleosome assembly protein-related
49.m00028	1.24858	3.0228e-05	2-oxoisovalerate dehydrogenase, putative
80.m02338	1.24854	0.0333112	hypothetical protein
59.m06083	1.24834	0.000890478	tim10/DDP zinc finger domain-containing protein
641.m01459	1.24782	0.0138863	L-type amino acid transporter-related
583.m00627	1.24781	0.00731875	CRAL/TRIO domain-containing protein
80.m00087	1.24742	0.000122744	succinyl-CoA ligase alpha subunit, putative
49.m05674	1.24721	0.000986775	hypothetical protein
20.m03667	1.24709	0.00855332	eukaryotic translation initiation factor 3 subunit 10, putative
57.m01695	1.24666	0.0394641	hypothetical protein
83.m01268	1.24656	0.0493553	hypothetical protein, conserved
55.m04833	1.24648	0.0407449	endonuclease/exonuclease/phosphatase domain-containing protein
583.m05480	1.24645	0.0193024	hypothetical protein
42.m03461	1.24615	0.0416646	hypothetical protein
583.m05753	1.24599	0.0252758	longevity-assurance (LAG1) domain-containing protein
44.m02784	1.24572	0.0473107	rhoGAP protein, putative
76.m01666	1.2447	0.0227114	hypothetical protein, conserved
59.m00038	1.24399	0.0150928	hypothetical protein
50.m03283	1.24369	0.000664205	ctr copper transporter domain-containing protein
50.m05692	1.24352	0.0274022	hypothetical protein
49.m00066	1.24351	0.00021966	vacuolar sorting protein 35, putative
59.m00009	1.24322	6.77336e-05	ribosomal protein S17p-related
20.m05985	1.24318	0.0105315	RNA-binding protein, putative
57.m03121	1.24267	0.00145295	hypothetical protein
583.m00637	1.24231	0.000834951	fibrillarin, putative
52.m01556	1.24182	0.0446723	viral A-type inclusion protein repeat family
37.m00775	1.24169	0.0131614	proteasome PCI domain-containing protein
80.m00011	1.2414	0.0116137	protein transport protein Sec23, putative
162.m00505	1.24019	0.0218845	hypothetical protein
59.m03587	1.23935	0.0102074	calmodulin-related
42.m03287	1.23841	0.00162968	hypothetical protein, conserved
57.m01772	1.2384	2.15794e-05	hypothetical protein
44.m02639	1.23816	0.00826435	hypothetical protein
20.m03929	1.23783	0.00075082	hypothetical protein
59.m07773	1.23759	0.0433414	adaptor complexes medium subunit domain containing protein
547.m00082	1.23757	0.000107914	glycerol-3-phosphate dehydrogenase, putative
20.m03864	1.23737	0.019291	endonuclease/exonuclease/phosphatase domain-containing protein
46.m00016	1.23729	8.75258e-05	translation initiation factor 2 beta, putative
38.m01067	1.23661	0.0142226	alanyl-tRNA synthetase, putative
49.m00061	1.2366	0.00532833	translation initiation factor, putative
20.m03680	1.23619	0.00113939	eukaryotic aspartyl protease, putative
583.m09158	1.23607	0.00735785	hypothetical protein
38.m01061	1.23571	0.00333935	acid phosphatase, putative
50.m00032	1.23524	1.51482e-05	hypothetical protein, conserved
55.m00094	1.23493	0.0322721	5-aminolevulinic acid synthase, putative
33.m01319	1.23487	0.0315106	hypothetical protein
55.m04808	1.2348	0.00170755	vacuoloar ATP synthase subunit D, putative
33.m02670	1.23451	0.00385826	hypothetical protein
42.m03603	1.23423	0.00456137	hypothetical protein
25.m01777	1.23374	0.0290009	DnaJ domain-containing protein
49.m03098	1.23372	0.00333881	hypothetical protein
59.m03398	1.23343	0.00541604	hypothetical protein
65.m00014	1.23331	0.000677595	proteasome subunit alpha type 1, putative
55.m04677	1.23192	0.0163741	glucose transporter-related
20.m03708	1.2319	0.000309124	hypothetical protein, conserved
50.m03346	1.23146	0.00302854	tetrapyrrole (corrin/porphyrin) methylase domain-containing protein
83.m01289	1.23143	7.88329e-05	hypothetical protein
27.m00114	1.23097	0.00387266	ubiquitin carboxyl-terminal hydrolase, putative
50.m03428	1.23005	0.00747311	ribosomal protein L7/L12, putative
33.m01341	1.22954	0.00326026	adapter-related protein complex, putative
52.m02715	1.22687	0.00062502	ankyrin repeat-containing protein
20.m03851	1.22624	0.0149316	hypothetical protein
55.m04813	1.22622	0.0315492	hypothetical protein
50.m03340	1.2259	0.000258416	hypothetical protein, conserved
46.m01688	1.22551	0.000121849	autophagocytosis associated protein, putative
42.m03435	1.22529	0.00265854	phosphatidylserine decarboxylase proenzyme, putative
55.m00167	1.22434	0.0468818	hypothetical protein
44.m06356	1.22408	0.00588552	hypothetical protein
59.m00006	1.22287	0.00112559	cyst matrix protein, putative
541.m01151	1.22257	0.00032962	calmodulin, putative
20.m03869	1.22211	0.00447934	DnaJ domain-containing protein
44.m00011	1.22161	0.00728243	cytochrome c, putative
65.m02507	1.22155	0.00221037	hypothetical protein
50.m03352	1.2209	0.00619971	hypothetical protein
44.m02736	1.22076	0.00464826	hypothetical protein
49.m03315	1.22032	0.00205011	hypothetical protein
145.m00347	1.21916	0.00230852	26S protease regulatory subunit 6a, putative
641.m00003	1.21913	0.0361232	rar1
49.m03164	1.21909	0.000967965	hypothetical protein, conserved
641.m01510	1.21884	0.00366974	glycosylphosphatidylinositol anchor attachment 1 protein, putative
20.m03684	1.21872	0.0208353	hypothetical protein
20.m03896	1.21864	0.000295203	rhoptry protein, putative / protein kinase domain-containing protein
583.m00636	1.21815	0.00411898	hypothetical protein
42.m07426	1.21762	3.14735e-05	hypothetical protein
57.m03130	1.2176	0.0145492	hypothetical protein
33.m01280	1.21603	0.00214322	GTP binding protein, putative
80.m02332	1.21409	0.0128838	ADP-ribosylation factor protein-related
46.m01692	1.21408	0.00384639	mitochondrial processing peptidase beta subunit, putative
20.m03682	1.21393	0.00546738	hypothetical protein
641.m00177	1.21351	0.00103128	lipoamide acyltransferase component of branched-chain alpha-keto dehyrogenase complex, putative
641.m02560	1.21333	0.00420006	DnaJ domain-containing protein
641.m01588	1.21285	0.00154255	glycine-rich protein 2, putative
57.m01735	1.21264	0.0444204	hypothetical protein
20.m00004	1.21223	0.000895587	mitochondrial processing peptidase alpha subunit, putative
641.m01490	1.212	0.00703536	hypothetical protein
38.m01889	1.21166	0.00340063	vacuolar ATP synthase subunit B, putative
55.m04838	1.21115	0.00217627	orotate phosphoribosyltransferase, putative
42.m00123	1.21072	0.00307053	phosphofructokinase, putative
20.m03945	1.21062	3.83385e-05	ER lumen protein retaining receptor 1 (KDEL receptor 1), putative
641.m00179	1.21044	0.00149023	ribosome biogenesis regulatory protein homolog
46.m03658	1.21017	0.0102285	hypothetical protein, conserved
86.m00361	1.20947	0.00788474	UV excision repair protein rhp23, putative
42.m00069	1.20946	7.93786e-05	elongation factor 1-beta, putative
55.m05099	1.20854	0.00167042	hypothetical protein, conserved
20.m03759	1.20823	0.00374709	hypothetical protein
583.m00614	1.20786	0.0436211	small nuclear ribonucleoprotein (snRNP), putative
55.m04891	1.20714	0.0336411	ubiquitin thiolesterase protein, putative
49.m03159	1.20489	0.0153588	ROP8, putative
20.m00003	1.20408	0.019436	hypothetical protein
49.m03440	1.20327	0.0400748	MIZ zinc finger protein, putative
76.m01667	1.20315	0.00778763	hypothetical protein, conserved
42.m03460	1.20302	0.0103059	F-box domain-containing protein
49.m00060	1.20298	0.000703823	heat shock protein 90, putative
42.m05857	1.20294	0.000517895	hypothetical protein
80.m02318	1.20294	0.0371773	vacuolar ATP synthase 22 kDa proteolipid subunit, putative
42.m00062	1.20202	0.000807549	ADP-ribosylation factor GTPase-activating protein, putative
49.m07252	1.20155	0.0175585	hypothetical protein
72.m00391	1.20154	0.00548542	selenophosphate synthetase-related
641.m01538	1.20138	0.000315821	ubiquitin-conjugating enzyme E2, putative
50.m03207	1.20132	0.00950689	hypothetical protein
31.m00905	1.20098	0.00754869	ubiquitin carboxyl-terminal hydrolase, putative
50.m03325	1.20082	0.0200018	hypothetical protein
641.m01494	1.20079	0.0152817	DNA/pantothenate metabolism flavoprotein domain-containing protein
55.m05000	1.20064	0.00883984	hypothetical protein
46.m02875	1.20061	0.0247239	hypothetical protein
25.m01769	1.20009	0.0165791	S-phase kinase-associated protein, putative
80.m00086	1.19996	0.00622293	macrophage migration inhibitory factor, putative
20.m03933	1.19842	0.00600951	hypothetical protein
69.m00202	1.19784	0.00191476	hypothetical protein
76.m03420	1.19765	0.0278672	hypothetical protein
129.m00246	1.19685	0.00601069	ferredoxin-NADP reductase, putative
64.m00349	1.19656	0.0342239	bromodomain domain-containing protein
44.m00020	1.1961	0.0114779	pfs77-related
33.m01285	1.19424	0.0033278	ulp1 protease family, C-terminal catalytic domain-containing protein
42.m03583	1.19359	0.0129066	epidermal growth factor receptor substrate 15-related
55.m00020	1.19352	0.0105442	myosin D, putative
31.m01816	1.1935	0.0263027	iron-sulfur cluster assembly accessory protein, putative
52.m02692	1.19325	0.00634022	hypothetical protein, conserved
27.m00003	1.19294	0.00218047	protein disulfide isomerase, putative
42.m03453	1.19186	0.0353769	hypothetical protein
55.m04923	1.19114	0.0308571	transcription initiation protein, putative
52.m02700	1.19088	0.0381229	protein phosphatase 2C, putative
44.m02780	1.1906	0.0285914	GTP-binding protein, putative
46.m01667	1.19027	0.00268715	hypothetical protein
583.m05637	1.18923	0.0340788	myosin-related
49.m03215	1.18923	0.00121984	hypothetical protein
583.m05553	1.18865	0.0258738	DnaJ domain-containing protein
59.m00060	1.18766	0.0358283	hypothetical protein, conserved
52.m02720	1.18753	0.00924972	tim10/DDP zinc finger domain-containing protein
50.m03320	1.18746	0.00477505	glutaredoxin domain containing protein
65.m02726	1.18657	0.0414293	hypothetical protein
80.m00014	1.18651	0.000108493	nucleosome assembly domain-containing protein
80.m02206	1.18623	0.0147681	methionyl-tRNA synthetase, putative
55.m04970	1.18606	0.0222822	eukaryotic translation initiation factor 3 subunit 11, putative
28.m00308	1.18545	0.00102037	vacuolar ATP synthase 16 kDa proteolipid subunit, putative
80.m03991	1.18504	0.0240523	TBC domain-containing protein
20.m03910	1.18483	0.0279568	TCP-1/cpn60 family chaperonin, putative
583.m00003	1.18472	0.0101157	surface protein rhoptry, putative
46.m01700	1.18458	0.000223765	hypothetical protein
50.m03362	1.18411	0.0180185	zinc finger (CCCH type) protein, putative
76.m01664	1.18377	0.00129919	hypothetical protein
583.m05514	1.18366	0.0011368	hypothetical protein
59.m00029	1.18316	0.00946197	hypothetical protein
49.m00056	1.18308	0.00544816	hypothetical protein
64.m00343	1.18273	0.0313427	ubiquinone biosynthesis protein COQ4, putative
49.m03357	1.18267	0.00741709	HIT domain-containing protein
583.m05533	1.18204	0.000786911	hypothetical protein, conserved
49.m03400	1.18184	0.0010746	hypothetical protein
129.m00403	1.18173	0.0344292	phosphatidylinositol N-acetylglucosaminyltransferase subunit, putative
76.m01665	1.18114	0.0119267	lysophospholipase, putative
583.m05716	1.18089	0.0165896	DNA-directed RNA polymerase II 13.3 kDa polypeptide, putative
55.m04602	1.17907	0.0243036	AP2
80.m02271	1.17853	0.000399443	PBS lyase HEAT-like repeat domain-containing protein
55.m00171	1.17803	0.0267341	TPR domain-containing protein
55.m05095	1.178	0.0109776	hypothetical protein
50.m07131	1.17762	0.039297	hypothetical protein
55.m04934	1.17757	0.00678283	structure specific recognition protein, putative
20.m05892	1.17752	0.0122862
80.m03996	1.17683	0.0104496	hypothetical protein
59.m03693	1.17573	0.00517051	hypothetical protein
42.m03448	1.17572	0.0237176	hypothetical protein
33.m01370	1.17547	0.000361396	L-type amino acid transporter-related
80.m02297	1.17544	0.0133309	endomembrane domain-containing protein
38.m00012	1.17531	0.0400025	hypothetical protein
55.m00118	1.17509	0.0345631	cell division protein, putative
80.m02268	1.17473	0.0156042	hypothetical protein
76.m01695	1.17315	0.0337676	sulfate transporter family domain-containing protein
42.m03611	1.17251	0.00318467	eukaryotic translation initiation factor 3 subunit 5, putative
80.m00006	1.17241	0.00287329	malate:quinone oxidoreductase, putative
42.m03595	1.1714	0.00186819	proteasome PCI domain-containing protein
55.m04697	1.17033	0.00325576	succinate-semialdehyde dehydrogenase, putative
583.m05566	1.16977	0.0184148	hypothetical protein
42.m00046	1.16966	0.0022333	hypothetical protein
80.m00018	1.16931	0.0161416	ubiquinol-cytochrome C reductase complex 14 kDa protein-related
83.m01195	1.16914	0.0019994	NADP-specific glutamate dehydrogenase, putative
25.m01810	1.1688	0.0100748	hypothetical protein, conserved
162.m00322	1.16874	0.0476369	GTP-binding protein, putative
113.m00755	1.16736	0.00504771	duplicated carbonic anhydrase
55.m08191	1.16722	0.00470991	protein kinase domain-containing protein
52.m00011	1.16691	0.00422755	peptidase, putative
50.m03247	1.1662	0.000370332	aspartate aminotransferase, putative
50.m00034	1.16451	0.00371717	ubiquitin carboxyl-terminal hydrolase isozyme L5, putative
80.m02344	1.16441	0.0402368	HECT-domain (ubiquitin-transferase) containing protein
641.m01460	1.1644	0.0125585	major sperm protein domain-containing protein
44.m02793	1.16425	0.00580413	UPF0101 protein CGI-137, putative
55.m04802	1.16418	0.0136732	lectin-domain protein
113.m00802	1.16366	0.0020283	dense-granule antigen DG32, putative
57.m00027	1.16366	0.00386726	thioredoxin, putative
583.m00647	1.16356	0.0269463	splicing factor protein, putative
551.m00238	1.16276	0.00421364	rhoptry antigen, putative
52.m01632	1.16269	0.0261726	zinc transporter ZIP domain-containing protein
49.m00051	1.16239	0.0132169	prohibitin, putative
59.m03526	1.16196	0.00726876	deoxyribose-phosphate aldolase, putative
25.m01780	1.16175	0.000979644	mitogen-activated protein kinase, putative
74.m00445	1.16163	0.012961	vacuolar ATP synthase subunit D, putative
55.m10236	1.16091	0.00850392	Roadblock/LC7 domain containing protein
55.m04695	1.16052	0.0361481	SCO1/SenC domain-containing protein
59.m00007	1.15831	0.0234484	cyclin dependent kinase, putative
80.m02235	1.15771	0.000473293	hypothetical protein
583.m00686	1.15756	0.0107069	branched-chain alpha-keto acid dehydrogenase, putative
41.m00006	1.1565	0.00082919	eukaryotic translation initiation factor 3 subunit 9, putative
44.m00001	1.15608	0.00419736	membrane-associated calcum-binding protein, related
55.m00227	1.15552	0.0189759	hypothetical protein
64.m00001	1.1551	0.0272568	p97 protein
38.m01096	1.15491	0.0159794	eukaryotic porin domain-containing protein
50.m03107	1.15488	0.0247057	hypothetical protein
33.m01314	1.15451	0.0431742	ribosomal protein L9, N-terminal domain protein
641.m00185	1.15384	0.00246868	G1 to S phase transition protein, putative
42.m00058	1.15255	0.0239755	bis(5'-nucleosyl)-tetraphosphatase, putative
50.m00056	1.15223	0.00920052	long chain acyl-CoA synthetase, putative
59.m06089	1.15193	0.0492034	hypothetical protein
42.m07404	1.15175	0.00488632	hypothetical protein, conserved
33.m01321	1.1511	0.0314922	hypothetical protein, conserved
38.m02377	1.15052	0.0114314	SET domain containing protein
55.m08184	1.1505	0.00687859	hypothetical protein
44.m04627	1.15006	0.0225871	hypothetical protein, conserved
129.m00254	1.14988	0.0173696	hypothetical protein
541.m01181	1.14872	0.00276248	hypothetical protein
583.m05757	1.14788	0.00552311	myosin heavy chain-related
41.m01386	1.14747	0.00858368	hypothetical protein, conserved
44.m00051	1.14685	0.0323028	prohibitin-related
20.m03949	1.14654	0.00792851	hypothetical protein
64.m00333	1.14621	0.000261839	small nuclear ribonucleoprotein E, putative
57.m00022	1.14457	0.0395354	hypothetical protein, conserved
55.m04627	1.14283	0.0106173	calmodulin-related protein
541.m01196	1.14245	0.00363466	RNA binding protein, putative
583.m05416	1.14185	0.0336539	glucoamylase S1/S2 precursor-related
583.m00682	1.14074	0.0274041	hypothetical protein, conserved
49.m07209	1.13973	0.00442556	hypothetical protein
55.m00277	1.13928	0.00382716	hypothetical protein, conserved
83.m01285	1.13866	0.00103035	hypothetical protein
42.m00079	1.13848	0.00837599	cAMP-dependent protein kinase catalytic subunit, putative
55.m05032	1.13764	0.0128553	hypothetical protein
86.m00357	1.13574	0.0332049	tubulin-specific chaperone A, putative
76.m00008	1.13531	0.0110421	synaptic glycoprotein sc2 homolog, putative
44.m04686	1.1347	0.00505501	hypothetical protein
49.m00015	1.13422	0.0422444	bystin, putative
83.m00015	1.13364	0.00167517	der1-like family domain-containing protein
145.m00331	1.1334	0.0456307	rhoptry neck protein 2
541.m01250	1.13301	0.0131245	hypothetical protein
44.m04682	1.13217	0.00525646	hypothetical protein, conserved
46.m00001	1.13205	0.0211332	myosin A, putative
80.m02343	1.13205	0.00939095	ROP8, putative
57.m00015	1.13177	0.000233399	DnaJ domain-containing protein
27.m00827	1.1315	0.00829161	hypothetical protein
64.m00002	1.13109	0.00938966	ADP ribosylation factor 1, putative
55.m00007	1.13066	0.00188855	pyruvate kinase, putative
59.m00055	1.13052	0.0123567	eukaryotic translation initiation factor 3 subunit 6 interacting protein, putative
55.m00224	1.1283	0.0097582	hypothetical protein, conserved
80.m03946	1.12754	0.0246319	hypothetical protein
49.m00031	1.12708	0.000415773	casein kinase 1, putative
583.m00005	1.12659	0.0137396	cytochrome c oxidase subunit II, putative
50.m00052	1.12623	0.016121	hypothetical protein
55.m00006	1.126	0.00565349	endoplasmic reticulum retention receptor, putative
50.m00020	1.12551	0.0134552	seryl-tRNA synthetase, putative
42.m03635	1.12383	0.0495763	phosphatidylinositol 3- and 4-kinase domain-containing protein
42.m03303	1.12285	0.0176907	TPR domain-containing protein
59.m03406	1.12239	0.00754361	hypothetical protein
641.m02553	1.12199	0.00725183	WD-40 repeat protein, putative
80.m02324	1.12124	0.0212102	hypothetical protein
113.m00016	1.11786	0.0167161	2,3-bisphosphoglycerate-dependent phosphoglycerate mutase, (phosphoglycerate mutase), putative
50.m00042	1.11785	0.0116996	GTP-binding nuclear protein RAN/TC4, putative
59.m03416	1.11781	0.0136279	mitochondrial inner membrane protease, putative
55.m00157	1.11655	0.00415472	hypothetical protein
113.m00798	1.11634	0.00222245	hypothetical protein, conserved
52.m02681	1.11588	0.015153	hypothetical protein
69.m00137	1.11514	0.0373601	hypothetical protein
42.m00105	1.11493	0.0233038	hypothetical protein
20.m05957	1.11437	0.0316033	hypothetical protein
83.m01196	1.11425	0.0218491	endonuclease/exonuclease/phosphatase domain-containing protein
49.m03229	1.11352	0.0369782	S-adenosylmethionine synthetase, putative
583.m00621	1.11303	0.0353898	hypothetical protein
641.m01505	1.11201	0.0478925	deoxyribose-phosphate aldolase, putative
35.m00005	1.11187	0.00305825	hypothetical protein
55.m00233	1.11173	0.00778373	casein kinase II alpha subunit, putative
55.m04995	1.11047	0.0312832	hypothetical protein
83.m01231	1.11016	0.0271571	hypothetical protein
50.m03117	1.1083	0.0216658	phospholipase D active site motif domain-containing protein
42.m07442	1.10749	0.0198005	hypothetical protein
27.m00846	1.10573	0.00165893	Rhoptry kinase family protein ROP26 (incomplete catalytic triad)
20.m03687	1.10394	0.0372617	hypothetical protein
20.m03902	1.10307	0.0223254	hypothetical protein
44.m00052	1.10244	0.00555086	58 kDa phosphoprotein, putative
27.m00091	1.10213	0.0157704	hypothetical protein
50.m03308	1.10114	0.00692042	hypothetical protein
583.m09209	1.10079	0.00563934	lysosomal acid phosphatase-related
49.m03434	1.09999	0.013795	hypothetical protein
20.m00382	1.09997	0.0182843	ATP synthase alpha chain, putative
41.m01266	1.09856	0.0489052	DEAD/DEAH box helicase, putative
59.m03400	1.09801	0.00171761	hypothetical protein
46.m00026	1.098	0.0299909	zinc finger (C3HC4 RING finger) protein, putative
42.m00052	1.09793	0.0399797	hypothetical protein
59.m03706	1.0978	0.0425082	hypothetical protein
20.m05937	1.09761	0.0196204	hypothetical protein
20.m03649	1.09614	0.0466972	zinc finger (CCCH type) protein, putative
46.m01597	1.0959	0.0126882	hypothetical protein
46.m00009	1.09556	0.00212628	U2 snRNP auxiliary factor small subunit, putative
44.m02763	1.09477	0.0282651	myosin-A docking protein, putative
25.m02949	1.09446	0.040393	hypothetical protein
541.m00141	1.09423	0.0453401	hypothetical protein
76.m01626	1.0939	0.0264327	SRS domain-containing surface antigen, putative
583.m00597	1.09278	0.0150872	sushi domain-containing protein / SCR repeat-containing protein
65.m01095	1.0905	0.0186879	membrane associated progesterone receptor component 1-related
44.m04622	1.09006	0.0333743	hypothetical protein
33.m02196	1.08885	0.039866	hypothetical protein
55.m08224	1.08858	0.0309787	phosphorylase B kinase gamma catalytic chain, putative
583.m05686	1.08845	0.00675948	hypothetical protein
20.m03873	1.08792	0.0418707	hypothetical protein
44.m00053	1.08777	0.0405861	RNA binding motif-containing protein
59.m03397	1.08724	0.0378005	hypothetical protein
583.m00615	1.08632	0.00697145	thioredoxin reductase, putative
80.m00015	1.08605	0.00319335	AP endonuclease, putative
42.m00084	1.08556	0.0416311	60S ribosomal protein L3, putative
59.m03455	1.08434	0.00813594	calmodulin, putative
55.m10279	1.08311	0.0313041	hypothetical protein
46.m01683	1.08293	0.0459688	prenylcysteine oxidase, putative
33.m02185	1.08246	0.007423	toxofilin
33.m02203	1.0761	0.0226133	hypothetical protein
50.m03120	1.07587	0.0354941	vacuolar ATP synthase subunit G1, putative
42.m03276	1.07557	0.00827343	eukaryotic translation initiation factor 4E, putative
20.m00331	1.07293	0.0461812	hypothetical protein
50.m03225	1.07192	0.0261961	mitochondrial carrier protein-related
72.m00382	1.07013	0.0229667	ubiquitin-conjugating enzyme E2, putative
41.m00024	1.06946	0.0393275	hypothetical protein, conserved
31.m00885	1.06595	0.0484402	hypothetical protein
50.m00015	1.05857	0.00639214	lactoylglutathione lyase, putative
42.m00048	1.05491	0.0247489	hypothetical protein, conserved
42.m03282	1.05378	0.036577	hypothetical protein

## Sheet: WT down-regulated
Gene ID	Fold change	P value	Product description
44.m04677	-7.11113	0.00130016	hypothetical protein
52.m03443	-6.93103	0.0226244	hypothetical protein
42.m03508	-6.76779	0.00120158	hypothetical protein
55.m04769	-6.60274	0.00061638	sporozoite-specific SAG protein
541.m01242	-5.90957	3.99522e-05	hypothetical protein
20.m00368	-4.36821	1.55005e-07	transmembrane domain-containing protein
145.m00330	-3.98336	2.37661e-07	hypothetical protein
76.m01634	-3.86957	0.000304557	hypothetical protein
65.m01106	-3.7291	9.83054e-07	hypothetical protein
59.m03370	-3.69974	4.01116e-05	hypothetical protein
33.m01360	-3.60031	2.80742e-05	hypothetical protein
77.m00087	-3.54466	0.000293589	hypothetical protein
52.m02726	-3.38965	3.74563e-05	hypothetical protein
50.m03090	-3.22609	2.61514e-06	hypothetical protein
37.m00005	-3.21913	9.1012e-07	hypothetical protein
46.m01600	-3.21891	0.000213103	surface antigen, putative
641.m01514	-3.20786	6.33884e-06	SRS domain-containing protein
69.m00262	-3.17322	1.16284e-05	hypothetical protein
59.m03419	-3.16959	1.11201e-06	hypothetical protein
50.m07108	-3.08507	4.00138e-07	hypothetical protein
65.m01969	-3.05018	7.80897e-07	hypothetical protein
20.m03764	-2.94483	2.55271e-05	cell wall protein-related
52.m00026	-2.8295	4.21527e-06	hypothetical protein
80.m02124	-2.81086	8.04747e-07	hypothetical protein
42.m03493	-2.79885	0.00400954	hypothetical protein
80.m00073	-2.79329	0.000303585	ruvB-like 2, putative
641.m01580	-2.78473	9.50505e-05	outer membrane protein romA
583.m05760	-2.78294	0.00193965	hypothetical protein
113.m00813	-2.72763	1.63737e-05	hypothetical protein
644.m00074	-2.67455	8.30283e-05	hypothetical protein
35.m00027	-2.66984	8.82429e-07	ankyrin repeat-containing protein
44.m02688	-2.64265	5.9874e-07	ppg3, putative
49.m03102	-2.61264	0.00165078	SRS domain-containing protein
59.m03529	-2.60161	1.00133e-07	hypothetical protein
44.m02689	-2.53692	0.00303826	ppg3, putative
52.m03461	-2.53288	0.000644474	hypothetical protein, conserved
65.m01170	-2.5269	4.90165e-05	hypothetical protein
583.m05510	-2.52213	0.0118352	hypothetical protein
83.m02142	-2.51522	6.34235e-05	transmembrane domain-containing protein
33.m01326	-2.51327	1.91938e-05	hypothetical protein
55.m08207	-2.50925	2.73477e-06	carbonic anhydrase-related
59.m03446	-2.50426	0.0135099	D13, putative
50.m03181	-2.50279	3.12643e-05	leucine rich repeat protein, putative
59.m07778	-2.48321	0.000272147	hypothetical protein, conserved
86.m00371	-2.48085	0.000550682	hypothetical protein
83.m02139	-2.46801	1.85531e-05	hypothetical protein
49.m05665	-2.44615	0.000198537	protein kinase, putative
42.m03509	-2.41306	3.68866e-07	calmodulin-domain protein kinase, putative
50.m07651	-2.39927	5.39499e-05	hypothetical protein, conserved
49.m05663	-2.39408	3.44968e-05	hypothetical protein
33.m01282	-2.39048	1.59184e-05	hypothetical protein, conserved
588.m00009	-2.37765	0.000102559	hypothetical protein
35.m00933	-2.3625	0.000933478	ATPase, AFG1 family domain-containing protein
57.m01859	-2.36093	0.000264575	hypothetical protein
20.m05963	-2.35991	0.00750765	hypothetical protein
50.m03299	-2.35751	0.00103303	hypothetical protein, conserved
42.m03382	-2.34579	0.0019241	retinitis pigmentosa GTPase regulator-related
583.m05630	-2.33024	5.4075e-06	hypothetical protein
42.m03410	-2.32737	1.34374e-07	hypothetical protein
65.m01130	-2.32081	0.0112644	hypothetical protein
80.m05396	-2.29962	1.01893e-05	serine/threonine-protein kinase, putative
37.m00763	-2.2928	0.011853	dynein light chain, putative
80.m02249	-2.28512	2.95278e-06	N-acetyltransferase 5, putative
42.m00006	-2.2777	0.000640284	serine/threonine protein phosphatase, putative
20.m03985	-2.27017	0.00332502	megakaryocyte stimulating factor, putative
25.m02928	-2.23885	2.90024e-05	phosphatidylethanolamine-binding protein homolog, putative
80.m02212	-2.23823	4.0872e-05	white protein, putative
25.m01812	-2.23594	1.11375e-05	hypothetical protein
44.m02540	-2.23405	0.000807235	hypothetical protein
645.m00544	-2.21793	0.00353898	hypothetical protein
33.m02667	-2.21449	0.00515452	hypothetical protein
76.m02661	-2.20934	8.97358e-05	glutathione S-transferase, putative
49.m05708	-2.20596	1.49531e-06	G-protein beta-subunit (transducin), putative
59.m03623	-2.19777	5.42658e-05	hypothetical protein
42.m03640	-2.19227	1.30408e-06	hypothetical protein
49.m03257	-2.1909	8.82597e-05	hypothetical protein
76.m01629	-2.18587	2.46917e-05	hypothetical protein
41.m02947	-2.1834	0.000261024	hypothetical protein
50.m03277	-2.1756	3.38907e-06	endonuclease/exonuclease/phosphatase domain-containing protein
49.m00045	-2.16677	0.00031458	bcs1 protein, putative
40.m00011	-2.162	0.00403983	hypothetical protein, conserved
83.m00011	-2.15945	1.55326e-05	hypothetical protein
57.m03133	-2.15893	7.76359e-06	hypothetical protein
20.m03958	-2.15566	0.000211554	insulinase-related
583.m05626	-2.13255	3.53755e-06	hypothetical protein
86.m00395	-2.13058	2.1285e-06	hypothetical protein
583.m05336	-2.12958	0.0160411	hypothetical protein
37.m00011	-2.1289	6.72034e-05	hypothetical protein
25.m01879	-2.12541	0.00162339	hypothetical protein
49.m03124	-2.11773	4.86275e-05	hypothetical protein
46.m03685	-2.10097	0.0029796	2Fe-2S iron-sulfur cluster binding domain containing protein
20.m00337	-2.09146	8.56007e-05	vitamin K epoxide reductase complex subunit 1, putative
20.m00387	-2.09036	4.18582e-05	subtilase family serine protease, putative
44.m02823	-2.07132	0.00788172	zinc finger (C3HC4 RING finger) protein, putative
583.m05627	-2.06948	0.0186704	hypothetical protein
145.m00583	-2.0627	1.00353e-05	hypothetical protein
50.m07652	-2.06216	0.000322104	hypothetical protein
49.m03256	-2.06138	0.00472735	hypothetical protein
59.m03583	-2.06067	0.0153841	hypothetical protein
39.m00359	-2.05817	6.01977e-05	hypothetical protein
583.m05736	-2.05733	9.16333e-06	hypothetical protein
64.m00341	-2.05539	0.000414782	hypothetical protein
25.m01745	-2.04988	6.85078e-05	tubulin delta chain, putative
83.m00006	-2.04722	2.25971e-05	hypothetical protein
49.m00054	-2.04205	0.00146453	hypothetical protein
55.m05001	-2.03178	0.0190739	hypothetical protein
49.m03176	-2.01891	0.000236156	hypothetical protein
20.m03768	-2.01614	0.000401126	hypothetical protein
59.m03387	-2.01609	0.00331957	RAD2 endonuclease-related
50.m05602	-2.01443	0.000461501	hypothetical protein
44.m02742	-2.00979	6.91712e-06	hypothetical protein, conserved
583.m09170	-2.00861	0.000364454	hypothetical protein
583.m05352	-1.99654	3.40605e-07	hypothetical protein
41.m01349	-1.99634	0.000423182	hypothetical protein
80.m00085	-1.9945	5.57475e-06	hypothetical protein
35.m01983	-1.99027	4.23364e-06	hypothetical protein, conserved
81.m00022	-1.97461	0.000182447	hypothetical protein
76.m02654	-1.97438	0.00161703	hypothetical protein
20.m03710	-1.97416	3.9964e-06	glycoprotease family domain-containing protein
57.m00026	-1.97385	8.59041e-06	hypothetical protein
75.m00012	-1.97379	0.000272325	hypothetical protein
50.m03150	-1.96431	4.37513e-05	hypothetical protein
583.m00652	-1.96215	4.44837e-06	hypothetical protein
59.m03420	-1.95927	0.000796006	hypothetical protein
59.m06125	-1.95576	6.63547e-05	hypothetical protein
52.m00017	-1.95462	1.46422e-05	hypothetical protein
80.m02251	-1.94744	2.26217e-06	hypothetical protein
59.m07749	-1.94697	0.00382771	hypothetical protein, conserved
59.m03401	-1.94192	1.62539e-05	CHCH domain-containing protein
46.m02884	-1.9417	8.59886e-06	hypothetical protein
25.m00201	-1.94155	0.000258911	radical SAM domain-containing protein
25.m01886	-1.94037	0.0305698	hypothetical protein
541.m02048	-1.93952	6.97943e-05	hypothetical protein
57.m01872	-1.93907	0.0026643	microneme protein, putative
46.m00029	-1.93751	0.000153667	pyrroline-5-carboxylate reductase, putative
80.m00008	-1.93553	0.000731226	Hsp20/alpha crystallin domain-containing protein
59.m00024	-1.93541	1.1896e-05	adenylate kinase-related
42.m03544	-1.93536	0.000199144	hypothetical protein
20.m03849	-1.93533	1.20062e-05	membrane-attack complex (MAC)/Perforin domain-containing protein
59.m06054	-1.93171	0.00068993	hypothetical protein
49.m05682	-1.93154	0.000501427	PAK1 interacting protein-related
52.m02683	-1.93113	0.000417101	hypothetical protein
80.m05017	-1.92813	0.0136078	hypothetical protein
42.m03581	-1.92801	0.000917384	hypothetical protein
42.m03394	-1.91894	0.0121976	calcium-dependent protein kinase, putative / calmodulin-domain protein kinase, putative
57.m03970	-1.91861	0.0195343	hypothetical protein
59.m03569	-1.91591	1.39195e-06	hypothetical protein
50.m00060	-1.90887	6.9079e-05	nudix (nucleoside diphosphate linked moiety X)-type motif 9
38.m00014	-1.90498	1.35512e-05	calcium-dependent protein kinase, putative / calmodulin-domain protein kinase, putative
80.m02181	-1.88968	7.9049e-05	hypothetical protein
583.m11483	-1.88833	0.0126989	hypothetical protein, conserved
44.m02720	-1.88813	1.71582e-05	RNA polymerase Rpb1 C-terminal repeat domain-containing protein / exonuclease domain-containing protein
76.m00014	-1.88715	1.02903e-05	hypothetical protein
76.m00018	-1.88258	0.000243261	hypothetical protein
46.m00025	-1.88197	1.37009e-05	protein kinase (incomplete catalytic triad)
50.m03169	-1.88191	3.88593e-05	hypothetical protein
39.m00623	-1.87866	6.52045e-06	proline-rich protein
540.m00192	-1.87855	1.56876e-06	hypothetical protein
41.m01333	-1.87615	0.000407905	hypothetical protein
65.m02512	-1.8759	9.63155e-05	hypothetical protein
59.m03600	-1.87104	0.000320166	hypothetical protein
52.m02675	-1.87074	1.37655e-05	hypothetical protein, conserved
42.m00054	-1.85292	1.00454e-05	hypothetical protein, conserved
49.m03227	-1.85281	4.67954e-07	hypothetical protein
42.m00076	-1.85042	3.26888e-05	hypothetical protein
239.m00011	-1.84841	0.00143557	hypothetical protein
50.m03102	-1.8483	8.92968e-05	hypothetical protein
80.m00051	-1.83881	1.08577e-06	cathepsin C-related
583.m00595	-1.83804	0.000101499	hypothetical protein, conserved
44.m04637	-1.8374	1.12368e-06	tRNA splicing 2' phosphotransferase 1, putative
49.m03147	-1.83549	0.000340944	calcium/calmodulin-dependent protein kinase II, putative
59.m03653	-1.83201	0.00167632	hypothetical protein, conserved
55.m04768	-1.83047	1.33096e-07	hypothetical protein
41.m01269	-1.8233	3.00193e-05	hypothetical protein
46.m01745	-1.82149	0.000636474	hypothetical protein
20.m03733	-1.81739	1.51076e-05	hypothetical protein
44.m02693	-1.81204	0.000353782	hypothetical protein
20.m03898	-1.80205	2.96739e-07	hypothetical protein
44.m04611	-1.79973	0.00115378	hypothetical protein
44.m02715	-1.79441	1.02341e-05	hypothetical protein
44.m02792	-1.79343	4.64281e-05	hypothetical protein
59.m03396	-1.7901	0.000106515	clp ATP-binding chain B1, putative
65.m01113	-1.78786	0.00110341	hypothetical protein
113.m00778	-1.78769	0.00907027	hypothetical protein
46.m02921	-1.78602	9.25444e-05	hypothetical protein
541.m01178	-1.78212	0.000515699	radical SAM domain-containing protein
44.m00027	-1.78207	0.00300516	hypothetical protein
83.m01182	-1.78188	0.00171456	hypothetical protein
25.m00212	-1.78053	9.48625e-05	microneme protein, putative
44.m00008	-1.77885	0.000194084	GPI-anchored surface protein
50.m05624	-1.7778	0.000447464	hypothetical protein
42.m03471	-1.77761	0.00552445	pterin-4a-carbinolamine dehydratase
27.m00099	-1.77554	4.94344e-06	hypothetical protein
80.m02259	-1.77521	0.00580669	hypothetical protein
540.m00203	-1.77461	2.24251e-05	protein kinase-related
44.m04646	-1.77438	4.1757e-06	hypothetical protein
583.m05576	-1.77194	0.000494417	hypothetical protein
59.m00036	-1.77009	0.00112836	hypothetical protein
583.m09147	-1.76896	0.00361558	hypothetical protein
28.m00433	-1.76791	8.0727e-08	hypothetical protein
76.m01628	-1.76745	0.000620421	hypothetical protein
145.m00326	-1.76435	0.000202625	hypothetical protein
583.m05599	-1.76172	9.77858e-05	hypothetical protein
33.m02671	-1.76	0.0303311	hypothetical protein
27.m00080	-1.75996	0.000110189	RNA-binding protein, putative
641.m01499	-1.75876	0.00130359	RNA recognition motif. (a.k.a. RRM, RBD, or RNP domain)-containing protein
70.m00040	-1.75299	9.54686e-06	hypothetical protein
33.m01365	-1.75031	0.000206277	zinc finger (C3HC4 RING finger) protein, putative
44.m04698	-1.74746	0.000319464	hypothetical protein
25.m00186	-1.74647	0.000112967	hypothetical protein
59.m07774	-1.74645	0.00470707	hypothetical protein
37.m00765	-1.74601	0.000611399	neurofilament triplet H protein-related
59.m03670	-1.74188	0.00216084	hypothetical protein
645.m00306	-1.74079	0.0177396	hypothetical protein
83.m01237	-1.74027	1.19251e-06	chitinase class I, putative
41.m01294	-1.7374	7.48797e-05	hypothetical protein
20.m03806	-1.73237	0.000245478	RNA binding protein, putative
583.m00678	-1.73188	0.00044279	hypothetical protein
20.m03858	-1.72832	4.76719e-05	hypothetical protein
59.m03715	-1.72699	0.00190749	hypothetical protein
44.m02610	-1.72376	0.00269312	hypothetical protein
20.m03959	-1.72328	0.00164696	hypothetical protein
20.m07367	-1.72282	0.00635183	Toluene-4-monooxygenase system protein B-related
55.m00223	-1.72272	4.54258e-06	mitochondrial 39-S ribosomal protein L47 (MRP-L47) domain-containing protein
25.m02946	-1.7218	0.00377216	hypothetical protein
46.m02899	-1.72027	0.000194632	hypothetical protein
38.m01058	-1.71693	0.000711618	hypothetical protein
33.m02677	-1.71633	0.001418	Tim10/DDP family zinc finger containing protein
50.m03350	-1.71319	6.93046e-06	microtubule-binding protein, putative
38.m00001	-1.71251	1.10728e-05	thrombospondin-related protein-1, putative
52.m02718	-1.71247	3.27571e-05	DNA polymerase delta subunit 4, putative
42.m00042	-1.71186	0.000518517	hypothetical protein
55.m04744	-1.71114	2.72686e-07	hypothetical protein
37.m00761	-1.71067	2.24795e-05	hypothetical protein
28.m00307	-1.71053	4.96555e-05	hypothetical protein
645.m00548	-1.70967	0.0119866	hypothetical protein
46.m01728	-1.70684	0.00115241	exonuclease domain-containing protein
50.m07098	-1.70639	0.000153399	hypothetical protein
35.m00909	-1.70368	4.97443e-05	hypothetical protein
55.m04985	-1.70351	0.00116864	lipase domain-containing protein
80.m02284	-1.70007	0.000181791	hypothetical protein
76.m01575	-1.69933	0.0115308	ribose-phosphate pyrophosphokinase, putative
27.m00866	-1.69882	0.00401307	hypothetical protein
20.m03860	-1.69861	0.0156384	subtilase family serine protease, putative
52.m00018	-1.69307	0.000666579	hypothetical protein, conserved
41.m00020	-1.6925	0.00820829	hypothetical protein
76.m01544	-1.69238	9.40694e-05	hypothetical protein
49.m03260	-1.69208	0.00065178	hypothetical protein
39.m00617	-1.68811	3.47603e-05	hypothetical protein
55.m05069	-1.68733	2.01783e-05	hypothetical protein
31.m00871	-1.68692	0.000528053	hypothetical protein
33.m00003	-1.68243	0.00023525	DNA repair enzyme, putative
20.m03746	-1.68141	0.000284448	dihydrouridine synthase domain-containing protein
63.m00001	-1.67892	0.000336258	hypothetical protein
42.m07394	-1.67665	4.07316e-06	hypothetical protein
25.m01863	-1.67607	4.08706e-05	hypothetical protein
80.m02174	-1.67515	8.28273e-05	hypothetical protein
80.m02160	-1.67343	0.00248702	radical SAM domain containing protein
583.m00011	-1.67277	0.000181661	subtilase family serine protease, putative
55.m10225	-1.67222	7.56919e-05	hypothetical protein
551.m00234	-1.66976	0.0013527	zinc-finger protein ZPR1, putative
55.m04692	-1.66937	0.000229343	tRNA-Gly GTP-binding conserved hypothetical domain-containing protein
20.m07355	-1.66879	5.34169e-05	hypothetical protein
35.m00904	-1.66825	0.0146337	hypothetical protein, conserved
583.m05682	-1.66697	0.00344854	hypothetical protein
74.m00762	-1.66436	0.0122147	hypothetical protein
76.m01659	-1.66435	0.000925097	hypothetical protein
57.m01708	-1.66337	0.000206806	sodium-dependent transporter, putative
38.m01083	-1.66334	5.77882e-05	elongation factor Tu GTP-binding domain-containing protein
41.m00040	-1.66293	0.00033589	transmembrane domain-containing protein
86.m00844	-1.66069	1.87546e-06	hypothetical protein
28.m00304	-1.66068	0.000134351	hypothetical protein, conserved
583.m05265	-1.65775	0.000450255	hypothetical protein
52.m01647	-1.65658	0.0333352	lipase domain-containing protein
20.m03893	-1.65529	0.00682109	hypothetical protein
57.m01769	-1.65492	0.000354099	hypothetical protein
80.m02136	-1.65421	0.0170959	hypothetical protein
42.m03388	-1.65383	0.000388117	long-chain fatty acid transport protein precursor-related
55.m04899	-1.6533	0.000110167	hypothetical protein
55.m04887	-1.65309	2.33892e-06	C2 domain-containing protein
44.m02565	-1.65284	0.00167776	p25-alpha domain-containing protein
38.m01103	-1.65136	9.90309e-06	acetoacetyl-CoA synthetase, putative
38.m01043	-1.65074	0.000479792	immunoglobulin-binding protein, putative
44.m02583	-1.65066	0.00654204	hornerin-related
80.m03994	-1.64612	8.37723e-05	endonuclease/exonuclease/phosphatase domain-containing protein
49.m00068	-1.64611	0.00035526	guanylate kinase, putative
20.m03960	-1.64597	0.0287479	hypothetical protein
39.m00618	-1.64565	0.000379772
80.m03965	-1.64543	0.00221313	hypothetical protein
583.m09092	-1.64437	0.0111543
50.m03414	-1.64286	0.000198639	hypothetical protein
49.m03345	-1.6425	0.00344126	OTU-like cysteine protease domain-containing protein
83.m01302	-1.64174	0.000317134	hypothetical protein
52.m01627	-1.64143	0.000128721	hypothetical protein
65.m01134	-1.64102	0.00161478	hypothetical protein, conserved
46.m01628	-1.64084	0.00674398	hypothetical protein
76.m02670	-1.63948	0.000547858	3' exoribonuclease-related
38.m01896	-1.6394	0.000563872	hypothetical protein
20.m03765	-1.63835	4.48837e-05	hypothetical protein, conserved
42.m03352	-1.63521	2.05195e-05	hypothetical protein
33.m01312	-1.63291	0.000486271	AP2 hypothetical protein
38.m01893	-1.63166	0.000200835	hypothetical protein
57.m03968	-1.63147	1.90539e-05	hypothetical protein, conserved
37.m00744	-1.6265	6.86568e-05	hypothetical protein
59.m07751	-1.6262	0.00912408	hypothetical protein, conserved
42.m00120	-1.6254	0.000122559	zinc finger (C3HC4 RING finger) protein, putative
57.m00010	-1.62535	7.64497e-05	dihydrouridine synthase domain-containing protein
645.m00305	-1.62331	0.000259996	pre-mRNA splicing factor 18, putative
59.m00018	-1.62323	0.00033569	WD domain, G-beta repeat-containing protein
80.m02227	-1.6232	0.000840864	hypothetical protein
33.m01347	-1.62282	1.63758e-05	F-box domain-containing protein
49.m03420	-1.62241	4.98247e-05	mitochondrial carrier domain-containing protein
55.m00250	-1.62222	0.000944668	armadillo/beta-catenin-like repeat-containing protein
57.m03124	-1.6205	0.00014025	acetyl-coenzyme A synthetase, putative
59.m00084	-1.61896	0.000216284	NLI interacting factor-like phosphatase domain-containing protein
20.m03805	-1.61689	0.00439803	FCA protein-related
55.m05108	-1.61651	0.0114346	hypothetical protein
55.m04848	-1.61637	7.36241e-06	hypothetical protein
74.m00434	-1.6158	0.00260818	hypothetical protein, conserved
46.m01610	-1.61534	2.47493e-05	hypothetical protein
65.m01180	-1.61499	0.0114439	hypothetical protein, conserved
83.m00012	-1.61495	5.9746e-07	hypothetical protein
583.m09211	-1.61091	2.57831e-05	hypothetical protein
55.m00103	-1.60929	1.60949e-05	hypothetical protein
25.m00003	-1.6085	0.000149018	serine proteinase inhibitor, putative
540.m00330	-1.6081	0.000512715	mob1/phocein family domain-containing protein
583.m05698	-1.60625	0.00559082	biotin/lipoate A/B protein ligase domain-containing protein
52.m01527	-1.60607	0.000808947	hypothetical protein
583.m05393	-1.6058	6.99346e-05	U5 snRNP-specific 40 kDa protein (hPrp8-binding), putative
55.m00014	-1.60478	1.09495e-05	microneme protein 7 (MIC7)
162.m00324	-1.60353	0.000651013	hypothetical protein
55.m05005	-1.60199	0.000243367	hypothetical protein
37.m01281	-1.60181	9.38444e-05	REX1 DNA repair domain-containing protein
63.m00148	-1.60178	0.00224506	penicillin acylase, putative
46.m01641	-1.59927	0.00409422	hypothetical protein
42.m00005	-1.59898	0.00220863	calcium-dependent protein kinase, putative / calmodulin-domain protein kinase, putative
39.m00619	-1.59893	0.0023919	hypothetical protein
59.m03649	-1.59809	0.00360881	AP2 hypothetical protein
76.m01632	-1.59741	0.000262287	hypothetical protein
59.m07772	-1.5964	0.0461142	hypothetical protein
25.m01800	-1.59639	0.000235797	pinA, putative
20.m00347	-1.596	0.00202026	protein phosphatase 2C, putative
20.m05912	-1.59569	0.00111911	hypothetical protein
20.m03845	-1.59394	1.23311e-05	YT521-B-like family domain-containing protein
583.m05667	-1.59385	0.00298789	alanine dehydrogenase, putative
145.m00321	-1.59227	2.20517e-05	hypothetical protein
65.m01201	-1.59155	0.00025907	tubulin-tyrosine ligase family protein
25.m00206	-1.5912	1.07397e-06	exonuclease domain-containing protein
33.m01284	-1.58915	0.000397764	4'-phosphopantetheinyl transferase, putative
59.m03635	-1.58856	5.14181e-05	hypothetical protein, conserved
76.m01613	-1.58731	0.000158026	hypothetical protein
641.m01493	-1.58712	3.59352e-05	mrp protein, putative
76.m00003	-1.58502	5.80616e-06	cAMP-dependent protein kinase catalytic subunit
49.m00025	-1.58315	6.97236e-05	SCP-like extracellular domain-containing protein
46.m01601	-1.58292	0.000394654	hypothetical protein
50.m03425	-1.58214	0.0286665	hypothetical protein
31.m00879	-1.58192	4.68576e-05	dentin sialophosphoprotein-related
72.m00388	-1.58156	0.000240997	hypothetical protein
31.m00872	-1.58034	0.0192782	WD domain-containing protein
541.m01141	-1.58027	0.001233	hypothetical protein
31.m00928	-1.57781	0.000473189	hypothetical protein
35.m00934	-1.57683	1.619e-05	hypothetical protein, conserved
42.m03283	-1.57634	0.00555245	hypothetical protein
59.m03494	-1.57516	0.000745877	hypothetical protein
25.m01817	-1.5751	0.000193751	hypothetical protein
20.m03954	-1.57434	0.000618641	dihydrolipoyl dehydrogenase, putative
50.m00027	-1.57412	0.00103946	eukaryotic aspartyl protease, putative
583.m09182	-1.57338	4.11838e-05	hypothetical protein
59.m03391	-1.57304	7.80637e-05	rhomboid family domain-containing protein
83.m01188	-1.57153	2.99132e-05	hypothetical protein
41.m02954	-1.57137	8.91537e-05	hypothetical protein
76.m03395	-1.56974	6.75054e-05	hypothetical protein, conserved
25.m01869	-1.56914	0.000107396	hypothetical protein
42.m03572	-1.56896	7.7566e-06	hypothetical protein, conserved
83.m02720	-1.56875	0.000404567	hypothetical protein
80.m02289	-1.56755	0.000394366	WD-40 repeat protein, putative
20.m03944	-1.56739	2.42066e-05	hypothetical protein
55.m04759	-1.56676	2.45482e-06	hypothetical protein
25.m00215	-1.56594	0.00181953	ribosomal protein S9p-related
59.m08335	-1.56514	3.65778e-05	hypothetical protein
38.m00003	-1.56322	0.000475145	microneme protein 6 (MIC6)
25.m01785	-1.56261	0.0421776	hypothetical protein
55.m00259	-1.56177	0.00165508	hypothetical protein
52.m03437	-1.55925	0.0433169	hypothetical protein, conserved
20.m00002	-1.55899	0.00017656	microneme protein 2 (MIC2)
50.m03413	-1.55794	0.000626827	proteasome activator subunit, putative
49.m03419	-1.55599	3.96188e-05	hypothetical protein
46.m00012	-1.55387	0.000231219	hypothetical protein
50.m03403	-1.55369	0.00291668	flap endonuclease-1, putative
57.m01744	-1.55276	0.000823011	pre-mRNA splicing factor, putative
35.m00013	-1.55206	4.91434e-05	transmembrane domian-containing protein
55.m05098	-1.55173	1.22642e-06	aminotransferase, putative
583.m05768	-1.54994	0.000948896	cullin homog, putative
541.m01203	-1.54897	0.00141931	hypothetical protein
42.m03587	-1.54781	5.69783e-05	hypothetical protein
42.m03607	-1.54744	0.00897441	pulmonary surfactant-associated protein D precursor-related
80.m00063	-1.54713	4.3957e-05	tryptophanyl-tRNA synthetase, putative
42.m00071	-1.54712	0.000164395	hypothetical protein
41.m01268	-1.54692	1.04981e-05	hypothetical protein
35.m01972	-1.5463	0.00167863	hypothetical protein
551.m00001	-1.54478	0.00188488	surface antigen
55.m10342	-1.54415	0.0183023	hypothetical protein, conserved
38.m01899	-1.54163	0.00305091	hypothetical protein
37.m00751	-1.54082	6.73163e-06	bacterial transferase hexapeptide-related
42.m03592	-1.53974	0.0390995	hypothetical protein
49.m00039	-1.53913	0.000206095	hypothetical protein
583.m05303	-1.5374	0.00010347	hypothetical protein
44.m04620	-1.53601	0.00492524	hypothetical protein
540.m00205	-1.5358	0.0227626	collagen alpha 1(III)-related
74.m00444	-1.53258	0.00038944	hypothetical protein
44.m02599	-1.53235	0.00694793	protein kinase-related
583.m05298	-1.53134	0.00158023	hypothetical protein
42.m00094	-1.53051	0.00034672	transmembrane amino acid transporter domain-containing protein
46.m01689	-1.52983	0.000241309	hypothetical protein
63.m00155	-1.52915	5.44777e-05	hypothetical protein
31.m00891	-1.52709	0.00332575	methyltransferase domain containing protein
42.m03289	-1.52648	0.00426769	hypothetical protein
641.m00190	-1.52619	6.51162e-05	tRNA-splicing endonuclease positive effector, putative
583.m09210	-1.52582	0.000982921	hypothetical protein
65.m00019	-1.52582	0.00089918	elongation factor Tu GTP-binding domain-containing protein
583.m05431	-1.52567	0.000189121	U3 small nucleolar ribonucleoprotein protein MPP10, putative
76.m00020	-1.52508	0.00168854	hypothetical protein, conserved
59.m06086	-1.52466	0.000316615	hypothetical protein
44.m02632	-1.52465	3.47467e-05	hypothetical protein
55.m00256	-1.5246	1.63057e-05	pumilio-family RNA binding repeat domain-containing protein
44.m04653	-1.52455	0.00941151	hypothetical protein
83.m01190	-1.52369	5.4596e-05	3', 5'-cyclic nucleotide phosphodiesterase domain-containing protein
20.m03916	-1.52293	0.00115543	RNA helicase, putative
42.m03346	-1.52249	0.00666536	vacuolar assembly protein-related
80.m02142	-1.52227	0.00372381	nuclear NF-kB activating protein-related
44.m04666	-1.5222	0.00926234	PAN domain-containing protein
49.m05734	-1.5221	0.00436284	trichohyalin, putative
49.m03371	-1.52209	0.0199159	hypothetical protein
59.m03559	-1.52156	0.0299765	hypothetical protein
641.m01527	-1.52145	0.000452927	hypothetical protein
583.m05417	-1.5213	6.08927e-05	glucoamylase S1/S2-related
25.m01804	-1.52054	0.000307063	myosin heavy chain, putative
129.m00244	-1.51968	4.95884e-05	RNA pseudouridylate synthase, putative
59.m03394	-1.51913	0.000859576	uncharacterized ACR, YagE family COG1723 domain-containing protein
583.m05492	-1.51876	0.0347412	hypothetical protein
20.m03669	-1.518	2.1893e-05	U3 small nucleolar ribonucleoprotein complex-associated protein, putative
83.m02704	-1.51787	0.000158016	hypothetical protein, conserved
583.m05621	-1.51763	0.00125556	hypothetical protein
42.m05838	-1.51763	0.000556491	3-hydroxyisobutyryl-CoA hydrolase, mitochondrial precursor, putative
20.m05899	-1.5175	0.0012607	hypothetical protein
44.m02794	-1.51685	6.13533e-05	WD domain, G-beta repeat-containing protein
583.m05395	-1.51559	0.0100039	AP2 hypothetical protein
55.m05054	-1.51548	0.00348654	rRNA methylase-related
541.m00136	-1.51312	0.00145335	peptidyl-prolyl cis-trans isomerase, putative
50.m03178	-1.51292	0.00908062	ABC transporter, putative
55.m04670	-1.51156	4.31499e-06	polyposis locus protein 1-related
65.m02516	-1.51068	0.0234566	hypothetical protein, conserved
42.m00019	-1.51009	0.00246583	zinc finger (C2H2 type) protein, putative
50.m05622	-1.50975	0.000655216	hypothetical protein
59.m03523	-1.50872	0.0133469	HECT type ubiquitin ligase, putative
50.m03333	-1.50848	0.00942066	hypothetical protein
46.m01626	-1.50806	0.00064761	protein kinase (incomplete catalytic triad)
59.m03599	-1.50763	0.000578118	hypothetical protein, conserved
55.m00229	-1.50686	4.60197e-05	hypothetical protein
76.m03398	-1.50628	0.000186969	hypothetical protein
57.m01796	-1.50596	0.00547093	hypothetical protein, conserved
57.m01759	-1.50346	0.000422964	hypothetical protein, conserved
25.m01830	-1.5034	0.0060702	1-deoxy-D-xylulose 5-phosphate synthase, putative
59.m06114	-1.50264	0.000308578
46.m01725	-1.50242	0.0188732	soraphen polyketide synthase-related
645.m00549	-1.50134	0.0124354	zinc finger (C2H2 type) protein, putative
46.m02910	-1.50117	0.00740355	hypothetical protein
59.m07736	-1.50084	0.00187946	hypothetical protein, conserved
46.m00002	-1.50067	0.00314071	fructose-1,6-bisphosphate aldolase
55.m04691	-1.50008	0.00394488	hypothetical protein
129.m00247	-1.49976	0.0198089	hypothetical protein
583.m09154	-1.49941	0.000185682	hypothetical protein
27.m00826	-1.49911	2.33824e-05	hypothetical protein, conserved
49.m03280	-1.49723	0.0274645	NUDIX hydrolase domain-containing protein
583.m00598	-1.49584	0.000276744	oligoribonuclease-related
80.m05016	-1.49572	0.0449185	hypothetical protein
25.m02945	-1.49559	0.0121133	hypothetical protein
35.m00931	-1.49512	0.00152261	hypothetical protein
49.m03359	-1.49508	4.18407e-05	acetyltransferase domain-containing protein
641.m01512	-1.49375	0.00263214	kelch motif domain-containing protein
50.m03296	-1.4934	0.00151765	translation initiation factor SUI1, putative
50.m03272	-1.49273	0.000899192	hypothetical protein
59.m03560	-1.49271	0.000194783	hypothetical protein
645.m00037	-1.49228	0.000168402	cathepsin L-like thiolproteinase, putative
541.m02054	-1.49188	0.000263431	hypothetical protein
80.m02254	-1.49154	0.0143627	hypothetical protein
80.m02221	-1.49148	0.000629711	hypothetical protein, conserved
59.m03536	-1.49145	0.00739105	GAF domain-containing protein
46.m01691	-1.48979	0.0145883	DNA mismatch repair protein, putative
25.m01865	-1.48874	0.0181277	hypothetical protein
37.m00013	-1.48852	0.00137056	DNA-directed RNA polymerase II, 8.2 kDa polypeptide, putative
541.m01169	-1.48818	3.12827e-05	mRNA capping enzyme, putative
55.m00219	-1.48736	0.00183678	hypothetical protein
80.m02263	-1.4867	0.0264685	hypothetical protein
46.m01746	-1.48604	0.000402593	hypothetical protein
83.m01198	-1.48576	0.000426533	hypothetical protein
42.m03299	-1.48549	0.00497977	hypothetical protein
583.m05517	-1.48538	0.000709533	ATP-dependent RNA helicase, putative
59.m03465	-1.48482	0.00186487	hypothetical protein
26.m00241	-1.48396	0.000391851	DEAD/DEAH box helicase, putative
8.m00194	-1.48375	0.000190547	hypothetical protein
583.m00658	-1.48319	0.00064773	WD repeat protein, putative
55.m05034	-1.48302	0.00640219	hypothetical protein
20.m03748	-1.48235	1.10703e-05	C2 domain-containing protein
162.m00513	-1.48222	0.034398	DnaJ domain-containing zinc finger (C2H2 type) protein, putative
55.m05073	-1.48139	0.00928194	RNA-binding protein, putative
50.m05687	-1.48134	1.35253e-05	hypothetical protein
80.m02356	-1.48134	0.000163587	hypothetical protein
86.m00365	-1.4807	0.0014049	hypothetical protein
55.m04914	-1.48024	0.0029607	dynein beta chain, ciliary, putative
583.m11473	-1.48013	0.0294599	hypothetical protein
27.m00863	-1.48009	0.000129486	hypothetical protein
55.m04656	-1.4793	0.0424564	hypothetical protein
42.m00073	-1.47906	0.000382417	zinc finger (CCCH type) protein, putative
80.m00025	-1.47844	0.00395807	cyclophilin, putative
59.m07750	-1.47818	0.0111239	hypothetical protein, conserved
31.m00861	-1.47774	7.86971e-05	hypothetical protein
25.m01819	-1.47695	0.000548679	hypothetical protein
35.m00846	-1.47488	0.00117357	hypothetical protein
33.m01394	-1.47418	0.0359463	WD-repeat protein (hussy-07), putative
55.m10232	-1.4741	3.90224e-05	hypothetical protein, conserved
583.m09199	-1.47385	0.0125657	hypothetical protein
52.m02684	-1.47346	0.00214335	hypothetical protein
641.m01534	-1.47278	8.73006e-05	hypothetical protein
80.m02194	-1.47255	0.00246933	hypothetical protein
583.m09164	-1.47105	0.000993176	hypothetical protein
50.m00002	-1.47056	2.44162e-05	microneme protein 8 (MIC8)
583.m05313	-1.47019	0.0376229	hypothetical protein
583.m05618	-1.46977	1.16567e-06	protein-tyrosine phosphatase, putative
76.m01561	-1.46966	0.046569	jmjC domain-containing protein
41.m01274	-1.46938	0.00013306	hypothetical protein
35.m00035	-1.46876	0.00248083	50S ribosomal protein L24, putative
50.m00070	-1.4687	0.00053862	hypothetical protein
641.m02536	-1.4681	0.0105565	hypothetical protein
25.m00214	-1.4676	0.00182615	protein phosphatase 2C, putative
541.m02038	-1.467	0.000175028	hypothetical protein
76.m01568	-1.46614	0.0119497	hypothetical protein
52.m03453	-1.46571	0.0035325	hypothetical protein, conserved
583.m05524	-1.46366	0.000139152	eukaryotic translation initiation factor 2B, putative
583.m00712	-1.46235	0.00432024	adenylyl cyclase associated protein
59.m03524	-1.46199	0.0303524	ATP-dependent RNA helicase, putative
20.m03751	-1.46102	0.000252343	hypothetical protein
64.m00348	-1.46064	0.0280316	phosphatidylinositol 3- and 4-kinase domain-containing protein
59.m06120	-1.45988	7.90539e-05	hypothetical protein
59.m00042	-1.45948	0.000502671	pyrroline-5-carboxylase reductase, putative
25.m03618	-1.45794	0.00182841	hypothetical protein
44.m02607	-1.45711	0.00388047	hypothetical protein
50.m00092	-1.45685	0.0183313	hypothetical protein
35.m00905	-1.45628	0.000368286	hypothetical protein
80.m03961	-1.45566	0.0313253	hypothetical protein
42.m03566	-1.45552	0.000143785	hypothetical protein
76.m00001	-1.45465	0.000102204	glucose-6-phosphate isomerase, putative
162.m00508	-1.45412	0.0015138	hypothetical protein
59.m03541	-1.45386	0.000165347	RNA binding motif-containing protein
583.m05555	-1.45385	0.0187446	hypothetical protein
44.m02611	-1.45345	0.00612045	hypothetical protein
583.m05439	-1.45315	0.00140436	protein kinase domain-containing protein
49.m03097	-1.45271	0.00105032	hypothetical protein
52.m01540	-1.45196	0.00096736	nuclear DNA-binding protein, putative
42.m00051	-1.45082	0.000121971	hypothetical protein
42.m03483	-1.45039	0.000683808	zinc finger protein, putative
80.m02214	-1.44873	0.00351116	hypothetical protein
80.m03958	-1.44822	4.47563e-05	formate/nitrite transporter, putative
80.m02155	-1.44706	0.0286026	proliferating-cell nucleolar antigen p120-related protein
25.m01787	-1.44677	0.0102361	transcription factor IIIB subunit, putative
583.m05284	-1.44676	0.00111514	HD domain-containing protein
8.m00185	-1.44655	0.00081861	subtilase family serine protease, putative
42.m05830	-1.44638	0.00169998	hypothetical protein
59.m07762	-1.44605	0.000427436	hypothetical protein
59.m03554	-1.44565	0.013485	hypothetical protein
46.m01640	-1.44553	0.00381346	hypothetical protein
541.m02060	-1.44549	0.000131284	hypothetical protein
50.m03186	-1.44495	0.00254437	hypothetical protein, conserved
33.m01363	-1.44327	0.00567808	RNA binding protein, putative
59.m03424	-1.44315	0.00278089	AP2 hypothetical protein
59.m03700	-1.44314	4.38212e-05	hypothetical protein
20.m05927	-1.44232	0.022057	hypothetical protein
583.m05353	-1.44173	0.000770913	glycogenin-1, putative
42.m00117	-1.44003	0.00148836	ATP-dependent RNA helicase, putative
52.m01590	-1.44002	4.3882e-06	hypothetical protein, conserved
76.m02658	-1.43949	0.00548192	translation initiation factor SUI1, putative
59.m03493	-1.43948	0.0404242	hypothetical protein
57.m03117	-1.43939	7.24944e-05	phosphodiesterase, putative
39.m00367	-1.43844	0.00560282	hypothetical protein
583.m05326	-1.43754	9.1397e-05	RNA binding protein, putative
55.m10328	-1.43666	0.000103703	hypothetical protein
61.m00117	-1.43569	0.00267755	hypothetical protein
50.m03103	-1.43568	0.00157985	serine protease inhibitor, putative
55.m00002	-1.43508	1.23095e-05	myosin C, putative
20.m05979	-1.43344	0.0100658	hypothetical protein
44.m02544	-1.43335	0.000349055	hypothetical protein
55.m10295	-1.43315	0.00759016	ferrichrome ABC transporter, ATP-binding protein-related
583.m05475	-1.43313	0.000272088	ATP-dependent RNA helicase, putative
31.m00910	-1.43221	0.00497439	lanthionine synthetase C-like protein 1, putative
583.m05733	-1.43173	0.00453506	hypothetical protein, conserved
83.m01304	-1.43156	0.00310082	ATP-dependent RNA helicase, putative
41.m01372	-1.43004	0.000213351	hypothetical protein
49.m07230	-1.42959	0.000133317	hypothetical protein
641.m01509	-1.42928	0.00278891	fertilin alpha subunit, putative
55.m05036	-1.42873	0.0450448	hypothetical protein
35.m01589	-1.42837	0.00546996	zinc finger (C3HC4 RING finger) protein, putative
44.m02616	-1.42835	0.0130439	transmembrane domain-containing protein
83.m01269	-1.42804	0.0322557	hypothetical protein
83.m01201	-1.42763	0.0104625	pyruvate dehydrogenase [lipoamide] kinase, putative
59.m00046	-1.42728	0.0106366	hypothetical protein
38.m02365	-1.42702	0.000364748	hypothetical protein
50.m03347	-1.4265	0.000482661	MAK16 protein, putative
72.m00843	-1.42642	0.000178872	KH domain containing protein
46.m00011	-1.42631	2.69401e-05	hypothetical protein
83.m00004	-1.42611	0.000739726	glucose-6-phosphate dehydrogenase
52.m00002	-1.423	0.00330042	P35 surface antigen
44.m00005	-1.42259	0.00184442	peroxisomal catalase
42.m05824	-1.42233	0.000523479	50S ribosomal protein L4, putative
52.m00003	-1.41918	2.48478e-06	microtubial-binding protein, putative
49.m00022	-1.41889	5.89178e-05	ribosomal protein L24, putative
125.m00070	-1.41761	0.039724	BTB/POZ domain-containing protein / kelch motif domain-containing protein
541.m02042	-1.41741	0.00595934	programmed cell death protein, putative
42.m03278	-1.41714	0.0343933	ATP-dependent RNA helicase, putative
55.m04718	-1.41712	1.64893e-05	homocysteine S-methyltransferase-1
55.m10255	-1.41554	0.00515167	diacylglycerol kinase, putative
59.m03547	-1.41457	0.000638473	hypothetical protein
42.m00074	-1.41266	0.000746885	hypothetical protein
42.m03373	-1.41114	0.0150587	hypothetical protein
59.m07770	-1.41107	0.0145403	hypothetical protein
59.m03468	-1.40995	7.78608e-05	hypothetical protein
49.m03274	-1.40886	0.00232106	zinc finger (CCCH type) protein, putative
41.m00030	-1.40771	0.00147935	serine/threonine protein phosphatase, putative
52.m01623	-1.40746	0.0458619	XAP5 protein, putative
583.m05671	-1.40738	0.000466673	hypothetical protein
50.m05695	-1.40656	0.000265711	hypothetical protein
44.m02801	-1.40626	0.00176036	triosephosphate isomerase, putative
39.m00366	-1.405	4.95741e-06	UBX domain-containing protein
57.m01688	-1.4044	0.0179922	AP2 hypothetical protein
42.m03356	-1.40413	0.00168175	hypothetical protein
44.m02752	-1.40227	0.000550319	erv1 / Alr family domain-containing protein
113.m00789	-1.40166	0.00970931	serine/threonine protein phosphatase, putative
49.m03383	-1.40123	0.00151401	hypothetical protein
59.m03695	-1.40017	4.47072e-05	serine/threonine-protein kinase-related
83.m01294	-1.39937	0.000879416	Universal stress response protein, hypothetical protein
583.m00665	-1.39928	0.000437848	hypothetical protein
76.m01627	-1.3989	0.00445256	AP2 hypothetical protein, conserved
50.m00089	-1.39696	0.000785165	hypothetical protein
20.m03838	-1.39661	0.00202405	hypothetical protein
44.m02755	-1.39621	0.00152432	small heat shock protein, putative / bradyzoite-specific protein, putative
49.m03291	-1.39607	0.0181163	mitochondrial carrier protein, putative
55.m04893	-1.394	0.00193887	hypothetical protein
541.m01176	-1.39298	0.0112044	hypothetical protein
59.m03631	-1.39292	0.00219863	hypothetical protein
55.m04842	-1.39265	6.66037e-05	orotidine-monophosphate-decarboxylase-related
38.m01108	-1.39199	0.0217705	NADPH-cytochrome p450 reductase, putative
55.m04631	-1.3901	0.000424408	hypothetical protein
52.m01655	-1.38958	0.00582068	hypothetical protein
44.m02791	-1.38877	6.76557e-05	hypothetical protein
83.m01233	-1.38841	0.00011559	hypothetical protein
44.m05913	-1.38825	2.08653e-06	hypothetical protein, conserved
20.m03659	-1.3874	0.000305083	hypothetical protein
41.m00015	-1.38619	0.000109626	dual-specificity phosphatase, catalytic domain-containing protein
645.m00309	-1.38507	0.00109579	RNA recognition motif domain-containing protein
59.m00082	-1.38498	0.025861	hypothetical protein
42.m03604	-1.38467	0.000396667	hypothetical protein
42.m03274	-1.3843	2.14247e-05	inner dynein arm I1 intermediate chain IC140-related
80.m02365	-1.38402	0.000228124	hypothetical protein
76.m01543	-1.38386	0.000490876	hypothetical protein
78.m00007	-1.38371	0.0494633	hypothetical protein
42.m00056	-1.38322	0.000257072	peptide methionine sulfoxide reductase, putative
583.m05628	-1.38311	0.0064337	hypothetical protein
42.m03306	-1.38189	0.023284	hypothetical protein, conserved
44.m02579	-1.38059	0.0026804	hypothetical protein
55.m04869	-1.38058	0.00419336	hypothetical protein
25.m00002	-1.3803	0.000240328	protease inhibitor 2, putative
583.m00669	-1.37969	0.000909123	phosphatidylinositol-4-phosphate 5-kinase, putative
644.m00103	-1.37924	0.0412524	hypothetical protein
65.m00002	-1.37889	0.00166285	H4, putative
50.m00072	-1.37785	0.000689617	NAD-specific glutamate dehydrogenase, putative
42.m05850	-1.37707	0.00437688	F-box domain-containing protein
583.m05408	-1.37697	0.000128749	zinc finger (CCCH type) protein, putative
33.m02669	-1.37649	0.00398667	hypothetical protein, conserved
72.m00001	-1.37639	0.000794737	non-transmembrane antigen
64.m00325	-1.375	0.00603834	ppg3, putative
52.m00010	-1.37494	0.000198693	asparagine synthase, putative
33.m01354	-1.37414	0.00299351	iron-sulfur subunit of succinate dehydrogenase, putative
20.m00005	-1.37405	0.00254544	dense granule protein 7
25.m00200	-1.37352	0.00171562	ribosomal protein S9-related
583.m05290	-1.373	0.0172324	AP2 hypothetical protein
50.m03142	-1.37268	0.00025299	hypothetical protein
25.m03612	-1.37222	0.00179127	hypothetical protein
20.m03745	-1.37088	0.0021916	RNA-binding protein, putative
76.m01546	-1.37088	0.000809794	DnaJ domain-containing protein
41.m02365	-1.37086	0.0153767	fibronectin-related
80.m02285	-1.37085	0.00269021	hypothetical protein
83.m01290	-1.36983	0.00244982	zinc finger (CCCH type) protein, putative
20.m00338	-1.36949	0.0221798	3'-5' exoribonuclease csl4, putative
46.m01602	-1.36913	0.001931	hypothetical protein
50.m00081	-1.36881	0.000364585	ribosomal protein L7, putative
83.m01236	-1.36824	3.19526e-05	EF hand domain-containing protein
547.m00087	-1.36708	0.00197032	elongation factor TS, putative
50.m03355	-1.36645	4.33038e-06	hypothetical protein
46.m02873	-1.36537	0.0210417	hypothetical protein
583.m05664	-1.3652	0.0014004	hypothetical protein
80.m03990	-1.36512	0.00459398	hypothetical protein
52.m01609	-1.36316	0.000701602	hypothetical protein
49.m03293	-1.36274	0.00223869	iron only hydrogenase large subunit, C-terminal domain-containing protein
20.m03953	-1.36245	0.0209709	hypothetical protein
551.m00021	-1.36239	0.0134471	GTP-binding protein lepA, putative
20.m05960	-1.36102	0.000668545	exosome complex exonuclease, putative
42.m03557	-1.3606	0.00422064	hypothetical protein
41.m01381	-1.36006	0.00542337	inositol monophosphatase, putative
42.m00044	-1.35984	3.30125e-05	hypothetical protein
8.m00004	-1.35961	0.00838087	hypothetical protein
20.m00327	-1.35942	0.00774891	transporter, putative
83.m01208	-1.35724	0.00188342	arginine N-methyltransferase-related
55.m04898	-1.35595	0.00233516	hypothetical protein
59.m06076	-1.35568	9.07787e-05	hypothetical protein
44.m02613	-1.35514	0.000745464	lipin, putative
583.m05528	-1.355	0.0134678	hypothetical protein
42.m00066	-1.35453	0.000845044	transmembrane domain-containing protein
38.m01892	-1.35378	8.4734e-05	elongation factor 1, putative
49.m03340	-1.35371	0.000474564	gamma-glutamyl hydrolase, putative
20.m03698	-1.35358	0.0305772	ABC1 domain-containing protein
28.m00283	-1.35345	0.0150948	hypothetical protein
55.m04673	-1.35228	0.0361049	major ampullate spidroin 2
25.m00006	-1.35226	0.000794319	microneme protein 4 (MIC4)
583.m00619	-1.35153	0.00507106	60s ribosomal protein L4, putative
42.m03397	-1.35132	0.0498281	hypothetical protein
52.m00012	-1.35122	0.00149202	protein antigen, putative
541.m01144	-1.35081	0.0346463	hypothetical protein
28.m00026	-1.35069	0.000188351	XPG N-terminal domain-containing protein / MKT1-related
27.m00836	-1.34959	0.0440646	hypothetical protein
33.m00006	-1.34872	0.00098437	MIC2-associated protein (M2AP)
583.m05348	-1.34852	0.00253755	hypothetical protein
583.m05581	-1.34852	0.00011963	ribosome biogenesis protein BMS1-related
71.m00006	-1.34767	0.0375537	hypothetical protein
65.m01187	-1.34703	0.00108942	guanine nucleotide-binding protein-related
25.m01799	-1.34592	0.0047312	PHD-finger domain-containing protein
20.m07361	-1.34557	0.000168534	hypothetical protein
33.m02666	-1.34545	0.000554723	hypothetical protein
583.m00013	-1.34476	0.00152401	iron-containing superoxide dismutase
83.m01244	-1.34457	1.09629e-05	hypothetical protein
583.m00680	-1.34402	0.00205646	DnaJ domain-containing protein
41.m01336	-1.34383	0.0038195	hypothetical protein
583.m05770	-1.34372	0.0134614	RNA pseudouridylate synthase domain-containing protein
583.m05401	-1.34286	0.0169564	hypothetical protein
25.m01845	-1.34266	0.0112437	transport protein particle (TRAPP) component, Bet3, domain-containing protein
50.m03082	-1.34258	0.000123192	hypothetical protein, conserved
80.m02146	-1.34199	0.0112288	glycosyl transferase, group 2 family domain-containing protein
641.m01501	-1.34127	1.37768e-06	eukaryotic translation initiation factor 6, putative
20.m05935	-1.34004	0.0272207	hypothetical protein
20.m03943	-1.33978	0.00614255	PHD-zinc finger (C3HC4 type) protein, putative
39.m00349	-1.33974	0.00366369	hypothetical protein, conserved
44.m02806	-1.33969	0.0254437	hypothetical protein
35.m00927	-1.33959	0.000550337	pre-mRNA splicing factor RNA helicase, putative
52.m02696	-1.33891	0.005308	cox19 family domain-containing protein
59.m03378	-1.33824	0.0229444	hypothetical protein
27.m01476	-1.3377	0.0118696	hypothetical protein
83.m00001	-1.33706	0.00562077	amidohydrolase family domain protein
55.m04745	-1.33699	0.0159201	hypothetical protein
49.m03169	-1.33681	0.00207793	hypothetical protein
76.m00007	-1.33579	0.000205014	peptidyl-prolyl isomerase, putative
76.m03423	-1.33549	0.0279684	hypothetical protein
25.m03625	-1.33532	0.0411744	hypothetical protein, conserved
583.m00684	-1.33487	0.000220033	general transcription factor IIIC, polypeptide 3, putative
25.m02941	-1.33431	0.0135914	hypothetical protein
583.m05546	-1.33391	0.00463697	hypothetical protein
42.m00128	-1.33347	0.00510757	DNA repair protein rhp16 (RAD16 homolog)-related
20.m03913	-1.33314	0.000110804	integral membrane protein, putative
80.m02218	-1.33281	0.00267878	collagen II alpha 1(II) chain-related
42.m03600	-1.33265	0.00531882	peptidyl-prolyl cis-trans isomerase-related
33.m00004	-1.33209	0.00149476	SAG2 related antigen SAG2E
55.m00209	-1.33201	0.000289141	nucleic acid binding protein, putative
83.m01253	-1.33157	0.00133975	hypothetical protein, conserved
55.m04868	-1.33148	0.0124684	folate/methotrexate transporter, putative
540.m00199	-1.33095	0.00272618	internalin, putative
80.m02138	-1.3307	0.000359981	hypothetical protein
83.m00014	-1.33053	2.04959e-05	hypothetical protein
55.m00236	-1.33005	5.66813e-06	hypothetical protein
38.m01088	-1.3295	0.00589719	protein kinase-related
80.m00090	-1.32892	0.00604657	oxidoreductase, putative
44.m00048	-1.32884	0.000634476	2OG-Fe(II) oxygenase family oxidoreductase, putative
80.m03968	-1.32884	0.00462117	AP2 hypothetical protein
46.m01756	-1.32879	0.0184791	protein phosphatase 2C, putative
50.m03295	-1.32841	0.00807124	hypothetical protein, conserved
76.m02664	-1.32815	0.00165524	hypothetical protein
55.m04975	-1.32811	0.00818991	hypothetical protein
59.m00073	-1.32805	0.0088266	lipoate-protein ligase A, putative
59.m00031	-1.32741	0.00093967	phosphatidylserine decarboxylase proenzyme, putative
83.m01287	-1.32575	0.0202035	RNA recognition motif. (a.k.a. RRM, RBD, or RNP domain) protein
55.m04770	-1.32468	0.0135413	hypothetical protein
42.m03350	-1.32359	0.000523386	aminopeptidase N, putative
20.m05980	-1.32326	2.98899e-05	hypothetical protein
583.m05377	-1.32305	0.0253664	NLI interacting factor-like phosphatase domain-containing protein
59.m06074	-1.32254	0.00207004	hypothetical protein
44.m00029	-1.3223	0.00951968	exosome complex exonuclease, putative
50.m03187	-1.32013	0.0174782	hypothetical protein
42.m00032	-1.31978	2.16439e-05	aminopeptidase N, putative
69.m00134	-1.31971	0.00286962	ATP-dependent RNA helicase, putative
57.m01779	-1.3197	0.00211159	hypothetical protein, conserved
42.m00018	-1.31941	0.00349369	hypothetical protein
55.m05027	-1.31901	0.0296354	dynein light chain, putative
41.m02937	-1.31863	0.007742	hypothetical protein
42.m00127	-1.31824	0.0285909	dgat2l1-prov protein
55.m05040	-1.3181	0.00878967	hypothetical protein
59.m03582	-1.31769	0.0103652	hypothetical protein
52.m01577	-1.31751	0.00419111	hypothetical protein, conserved
162.m00327	-1.31658	0.00124235	septum formation protein maf, putative
57.m00004	-1.31658	0.00854267	shaggy-related protein kinase, putative
541.m01234	-1.3162	0.00156612	hypothetical protein
583.m00713	-1.31596	0.028998	mitochondrial import inner membrane translocase subunit TIM17, putative
583.m05268	-1.31518	0.00274829	PP-loop domain-containing protein
57.m01691	-1.31511	0.00187124	bromodomain domain-containing protein
49.m00065	-1.31462	0.0121942	WD domain, G-beta repeat-containing protein
49.m03355	-1.31448	0.000265343	hypothetical protein
41.m01342	-1.31439	0.00391879	dense-granule antigen DG32, putative
80.m02265	-1.31427	0.000515865	hypothetical protein, conserved
42.m00025	-1.31379	0.00394714	RNA binding protein, putative
35.m01586	-1.31377	0.00127876	hypothetical protein
50.m00094	-1.31292	0.0377889	hypothetical protein
46.m00027	-1.3126	0.000911221	DEAD/DEAH box helicase, putative
42.m03398	-1.31241	0.00803119	hypothetical protein
583.m05639	-1.31226	0.0120711	hypothetical protein, conserved
55.m05075	-1.3116	0.0068995	pre-mRNA splicing factor RNA helicase, putative
33.m01361	-1.31149	0.0305225	hypothetical protein
583.m05721	-1.31117	0.0489885	hypothetical protein
55.m08210	-1.31058	0.00232037	tRNA-specific adenosine deaminase, putative
641.m01545	-1.31027	0.0247006	rRNA-processing protein FCF1, putative
641.m00182	-1.30956	0.000167453	choline kinase, putative
49.m03094	-1.30955	0.00915174	serine/threonine protein phosphatase, putative
50.m00010	-1.30945	0.00156063	microneme protein 10 (MIC10)
50.m05665	-1.30774	4.80665e-05	hypothetical protein
46.m00008	-1.30743	0.00660586	M16 peptidase domain-containing protein
42.m00095	-1.3074	0.000543679	hypothetical protein
83.m01280	-1.30733	6.45636e-05	hypothetical protein
44.m02606	-1.30673	0.0260867	hypothetical protein
72.m00687	-1.30542	0.0133615	lysine decarboxylase, putative
50.m05667	-1.30525	0.0490528	hypothetical protein
35.m00921	-1.30499	0.0208931	excision repair protein rad15, putative
645.m00313	-1.30443	0.00251084	transcription regulatory protein SNF2, putative
583.m05473	-1.30365	0.0236369	hypothetical protein
52.m03439	-1.30318	0.0304955	hypothetical protein
44.m02716	-1.30271	0.00783339	hypothetical protein
583.m05670	-1.30184	0.00758654	hypothetical protein
20.m03731	-1.3018	0.0174946	hypothetical protein, conserved
55.m04747	-1.30176	0.000304392	DNA-directed RNA polymerase II subunit
583.m00626	-1.30127	0.0105314	hypothetical protein
50.m00090	-1.30124	0.00343115	hypothetical protein
52.m01533	-1.30113	0.0178897	ATPase domain-containing cell division control protein, putative
50.m07103	-1.30105	0.0081738	hypothetical protein, conserved
25.m02955	-1.30014	0.00216616	40S ribosomal protein S28, putative
46.m01727	-1.29954	0.035269	hypothetical protein, conserved
42.m07414	-1.29916	0.00974582	hypothetical protein
44.m02747	-1.29875	0.00276946	hypothetical protein
25.m00208	-1.2987	0.0189728	wdr22 protein-related
35.m01592	-1.29842	0.00090252	hypothetical protein
59.m06102	-1.29798	0.000993527	hypothetical protein
44.m02687	-1.29783	0.000242686	hypothetical protein
44.m02775	-1.29743	0.0385275	hypothetical protein
65.m00016	-1.29719	0.00414861	hypothetical protein
551.m00227	-1.29712	0.00179155	hypothetical protein
55.m04730	-1.2965	0.0236852	protein kinase, putative
50.m00033	-1.29607	0.00120301	caltractin (centrin), putative.
37.m00741	-1.29539	0.000568204	protease inhibitor, putative
162.m00001	-1.29428	0.000880842	calcium-dependent protein kinase, putative / calmodulin-domain protein kinase, putative
542.m00225	-1.29324	0.0323739	jmjC domain-containing protein
41.m01377	-1.29248	4.5477e-05	sedlin (trafficking protein particle complex protein 2), putative
49.m03228	-1.29229	0.00159334	ferredoxin, putative
41.m00028	-1.29208	0.0023278	hypothetical protein
541.m01222	-1.29205	0.0405212	hypothetical protein
80.m02323	-1.29111	0.0124333	hypothetical protein
59.m00035	-1.28999	0.00350404	hypothetical protein
57.m01696	-1.28993	0.000574123	hypothetical protein
50.m00044	-1.28924	0.00405734	prefoldin subunit, putative
583.m00667	-1.28826	0.00442477	DEAD/DEAH box helicase, putative
57.m03135	-1.28786	0.0455411	hypothetical protein
641.m02557	-1.28694	0.000224736	CDK-activating kinase assembly factor, putative
59.m03531	-1.28683	0.0261369	hypothetical protein
1.m00014	-1.28673	0.00682302	hypothetical protein
583.m11411	-1.28607	0.0160153	SRS domain containing protein
59.m03658	-1.28451	0.0165989	hypothetical protein
583.m05601	-1.28386	0.00355515	hypothetical protein
31.m01825	-1.28237	0.0484117	hypothetical protein
542.m00409	-1.28199	0.00177622	hypothetical protein, conserved
583.m05761	-1.28181	0.000706232	hypothetical protein, conserved
541.m01200	-1.28097	0.0018091	hypothetical protein
50.m03164	-1.28009	0.000299732	lipid phosphate phosphohydrolase 3, putative
541.m01245	-1.28001	0.00984689	hypothetical protein
44.m02641	-1.27948	0.000441331	ribosomal protein S11, putative
42.m03534	-1.279	0.000168374	TBC domain-containing protein
145.m00329	-1.27865	0.00592327	ubiquitin carrier protein 4
74.m00447	-1.27809	0.001609	hypothetical protein, conserved
57.m00002	-1.27765	0.0194208	glutathione/thioredoxin peroxidase, putative
20.m03856	-1.27728	0.0116489	hypothetical protein
42.m03313	-1.27719	0.00993007	RNA-binding protein, putative
44.m02753	-1.27688	9.38998e-06	vacuolar proton-translocating ATPase subunit, putative
31.m00902	-1.2766	0.000521412	CHCH domain-containing protein
44.m02647	-1.27655	0.0140199	arsenical pump-driving ATPase, putative
542.m00217	-1.27569	0.0290663	platelet binding protein GspB, putative
20.m03749	-1.27562	0.0224541	FHA domain-containing zinc finger (C3HC4 type) protein, putative
59.m00013	-1.27315	0.00138565	zinc finger (CCCH type) protein, putative
35.m00915	-1.27179	0.000551004	nucleotidase, putative
8.m00181	-1.27164	0.00123702	rhomboid family domain-containing protein
42.m03395	-1.27159	0.00462646	NNP-1 protein-related
83.m02700	-1.27019	0.000665458	14 kDa transmembrane protein-related
83.m02140	-1.27016	0.00187556	hypothetical protein, conserved
583.m05732	-1.26984	8.03572e-05	hypothetical protein
80.m00001	-1.26963	6.38868e-05	heat shock protein 90
50.m03394	-1.26944	0.00728013	hypothetical protein
38.m01087	-1.26851	0.00399236	RNA methyltransferase, TrmH family domain-containing protein
55.m05046	-1.26844	0.00932295	Rhoptry kinase family protein ROP21
583.m11457	-1.26826	0.00297709	hypothetical protein, conserved
80.m00061	-1.26741	0.00478006	poly(A) binding protein, putative
20.m03972	-1.26736	0.0279344	AT hook motif-containing protein
33.m01323	-1.26695	0.0120416	hypothetical protein
26.m00232	-1.26686	0.000614118	hypothetical protein
44.m02609	-1.26645	0.00436485	hypothetical protein
42.m03546	-1.26619	0.0125964	protein kinase-related
41.m01299	-1.26586	0.00332725	hypothetical protein
49.m03233	-1.26538	0.0117354	hypothetical protein
49.m03361	-1.26527	0.00160043	hypothetical protein
46.m01609	-1.26494	0.00800706	hypothetical protein
42.m00096	-1.26461	0.00368498	glycosyl transferase, group 1 domain containing protein
20.m03918	-1.26413	0.0192686	nascent polypeptide-associated complex alpha chain, putative
46.m01612	-1.26399	0.00165888	acyl-CoA-binding protein, putative
583.m00687	-1.26338	0.000846826	hypothetical protein
59.m00077	-1.26278	0.000361588	protein phosphatase 2C, putative
65.m00001	-1.26263	0.013447	nucleoside-triphosphatase I
20.m05914	-1.26257	0.00391113	microneme protein 11 (MIC11)
55.m05023	-1.26249	0.0133432	zinc finger (CCCH type) protein, putative
80.m00022	-1.26133	0.00806819	hypothetical protein, conserved
641.m01530	-1.26129	0.0108487	hypothetical protein
57.m01774	-1.26109	0.000273085	protein kinase domain-containing protein
39.m00364	-1.261	0.0159449	RNase H, putative
49.m03348	-1.26097	0.00724125	hypothetical protein
55.m00281	-1.25844	4.46828e-06	DNA-directed RNA polymerase, putative
583.m00608	-1.25843	0.00256319	ubiquitin-conjugating enzyme E2, putative
26.m00242	-1.25752	3.47819e-05	RNA helicase-1
641.m00170	-1.25645	0.000187638	protein phosphatase 2C, putative
55.m00169	-1.25572	2.9403e-05	ribosomal RNA assembly protein, putative
49.m05698	-1.25472	0.0236348	hypothetical protein
611.m00052	-1.25464	0.000380063	enoyl-CoA hydratase, putative
41.m00026	-1.25318	0.00146905	hypothetical protein
42.m03452	-1.25259	0.00163605	hypothetical protein
20.m03891	-1.25071	0.0018133	hypothetical protein
125.m00072	-1.25047	0.0208425	SPX domain-containing protein
583.m05583	-1.2503	0.0469223	glutamic acid rich protein-related
583.m05438	-1.25026	3.00632e-06	ubiquitin-activating enzyme-related
33.m01396	-1.24975	0.000873807	cytidine and deoxycytidylate deaminase zinc-binding region domain-containing protein
44.m00006	-1.24968	0.00504447	lactate dehydrogenase
44.m00018	-1.24843	0.00196722	ribosomal protein L3p-related
46.m01657	-1.24799	0.00186631	PHD-finger domain-containing protein
80.m02161	-1.24776	0.00518606	hypothetical protein
59.m03671	-1.24758	0.0035725	hypothetical protein
42.m00068	-1.24755	0.00627372	acid sphingomyelinase-like phosphodiesterase-related
31.m00865	-1.24728	0.0025844	hypothetical protein, conserved
80.m02222	-1.24629	0.00411283	periodic tryptophan protein 1 (PWP1)-related
44.m04681	-1.24576	0.011823	hypothetical protein
55.m08215	-1.24534	0.000594654	signal recognition particle 14 kDa protein, putative
49.m05678	-1.24529	0.00129032	RNA recognition motif. (a.k.a. RRM, RBD, or RNP domain)-containing protein
583.m00707	-1.24502	0.0189303	hypothetical protein
59.m03467	-1.24456	0.00219411	hypothetical protein
583.m05592	-1.24444	0.00965073	ribosomal protein L19, putative
55.m10278	-1.2441	0.00016291	hypothetical protein
55.m00258	-1.24353	0.00207417	calcium-binding protein cabp5-related
65.m01111	-1.24342	0.00516072	nucleoside-triphosphatase II
76.m01687	-1.24176	0.000899316	hypothetical protein
55.m10242	-1.24173	0.000750432	hypothetical protein
50.m03121	-1.24149	0.00111614	hypothetical protein
25.m01782	-1.24075	1.20702e-05	MORN repeat-containing protein
20.m03780	-1.24013	0.0188994	hypothetical protein
42.m00015	-1.24002	0.00865918	28 kDa antigen
541.m01224	-1.23991	0.000887938	hypothetical protein
46.m00010	-1.23981	0.00882636	U2 snRNP auxiliary factor or splicing facotr, putative
113.m01287	-1.23949	0.00399631	hypothetical protein
541.m02045	-1.23865	0.0269305	collagen-related
49.m03273	-1.23858	0.000817998	vesicle transport v-SNARE, putative
20.m03744	-1.2384	0.0157736	hypothetical protein
80.m03992	-1.23793	0.000952989	hypothetical protein, conserved
583.m05746	-1.23785	0.0452701	erythrocyte-binding protein, putative
645.m00322	-1.23768	0.0227034	hypothetical protein
57.m01826	-1.2367	0.0225936	calcium/calmodulin-dependent protein kinase II, putative
65.m00003	-1.23527	0.00975135	multiprotein bridging factor type 1, putative
541.m02057	-1.23518	0.0143269	DNA-repair endonuclease subunit, putative
33.m02675	-1.23469	0.0158767	hypothetical protein
541.m00139	-1.23426	0.0143271	tRNA pseudouridine synthase B, putative
145.m00344	-1.23354	0.0474154	mtN3/saliva family domain-containing protein
541.m01211	-1.23212	0.002004	zinc finger (CHY type) protein, putative
33.m01288	-1.23202	0.000461508	protamine P1, putative
46.m00028	-1.23173	0.0107629	60S ribosomal protein L7a, putative
44.m02819	-1.23141	0.0337788	arginyl-tRNA synthetase, putative
50.m05677	-1.23041	0.000867094	centrosomal protein, putative
37.m00747	-1.2304	0.00230835	hypothetical protein
80.m02322	-1.22955	0.00152602	interferon gamma-inducible protein 30
49.m05661	-1.2295	0.00804562	60S ribosomal protein L22, putative
42.m00115	-1.2289	0.0125864	exosome complex exonuclease, putative
42.m03621	-1.22856	0.0258324	hypothetical protein, conserved
583.m00021	-1.22855	0.00853051	superoxide dismutase
76.m01580	-1.22836	0.0119823	hypothetical protein, conserved
55.m04782	-1.22781	0.0408466	ubiquitin-related
49.m00003	-1.22776	0.00183954	cAMP-dependent protein kinase regulatory subunit, putative
55.m00142	-1.22645	0.0363294	replication factor-related
25.m02943	-1.22579	0.0402658	hypothetical protein
583.m00605	-1.22576	0.00322456	long-chain-fatty-acid-CoA ligase, putative
57.m01749	-1.22535	0.0115565	ppg3, putative
55.m00161	-1.2244	0.00123929	hypothetical protein
31.m00093	-1.22439	0.00674695	conserved hypothetical ATP binding protein, putative
55.m04936	-1.22345	0.00281728	hypothetical protein
583.m09114	-1.22321	0.00101894	ras-related protein RAB2A, putative
55.m04981	-1.22288	0.00127015	hypothetical protein
39.m00613	-1.22285	0.0024233	hypothetical protein
42.m00099	-1.22249	0.00612133	hypothetical protein
145.m00751	-1.22213	0.0154174	hypothetical protein, conserved
50.m00091	-1.22192	0.00157994	zinc finger DHHC domain-containing protein
44.m02800	-1.22141	0.0417049	hypothetical protein
20.m03948	-1.22083	0.0188318	hypothetical protein
59.m00020	-1.22039	0.00384705	hypothetical protein
25.m01792	-1.22018	0.0375151	ftsJ-like methyltransferase domain-containing protein
59.m00043	-1.22018	0.0150623	seryl-tRNA synthetase-related
8.m00188	-1.21989	0.0233591	myb-like DNA binding domain-containing protein
49.m03211	-1.21982	0.00275931	hypothetical protein
50.m03072	-1.21914	0.031586	hypothetical protein
42.m07422	-1.2189	0.0193967	hypothetical protein
44.m04697	-1.21813	8.80009e-06	hypothetical protein
641.m02558	-1.21781	0.00276939	bis(5'-adenosyl)-triphosphatase, putative
83.m01279	-1.21779	0.00117047	rhomboid family domain-containing protein
33.m01348	-1.21775	0.00102646	aggrecan core protein-related
38.m01055	-1.21739	0.0147034	hypothetical protein
641.m01461	-1.21729	0.00365436	hesB protein-related
44.m02759	-1.21723	0.0252705	supt5h protein, putative
50.m05680	-1.21596	0.00101288	eukaryotic translation initiation factor 4A
38.m01052	-1.21578	0.0156496	hypothetical protein
551.m00226	-1.21578	0.0192769	hypothetical protein
541.m01173	-1.21562	0.0423289	acetyltransferase domain-containing protein
55.m04646	-1.21528	0.00556233	hypothetical protein
65.m00012	-1.21377	0.00739709	GTPase ras-related protein rab-2a-related
44.m02723	-1.21366	0.0214762	hypothetical protein
33.m01369	-1.21295	0.0433824	adenosine deaminase-related
55.m10319	-1.21292	0.0298864	hypothetical protein, conserved
52.m03455	-1.21244	0.0037046	hypothetical protein
583.m05552	-1.21085	0.00550051	60s ribosomal protein l6, putative
52.m02706	-1.2106	0.0191085	hypothetical protein
38.m01075	-1.21023	5.76297e-05	hypothetical protein
42.m03275	-1.21017	0.00228887	sec63 domain-containing DEAD/DEAH box helicase, putative
113.m00800	-1.20992	0.0291871	DNA primase, large subunit, putative
44.m02643	-1.20977	0.00786191	hypothetical protein
42.m00050	-1.20945	0.0090154	triosephosphate isomerase, putative
80.m00012	-1.20942	0.0105267	microneme protein 1 (MIC1)
46.m01717	-1.20912	0.0217786	hypothetical protein
31.m00877	-1.20848	0.00232834	plectin, putative
583.m00661	-1.20826	0.0108678	small heat shock protein, putative / bradyzoite-specific protein, putative
59.m00021	-1.20826	0.00405079	casein kinase II beta chain, putative
59.m00078	-1.20783	0.000126351	zinc finger, ZZ type domain-containing protein
80.m05018	-1.20777	0.00751155	hypothetical protein
59.m03566	-1.20738	0.00383884	60S ribosome subunit biogenesis protein NIP7, putative
20.m05934	-1.20724	0.0071039	hypothetical protein
46.m01704	-1.20605	0.000638933	hypothetical protein
33.m01372	-1.20533	0.0123052	S-adenosyl-methyltransferase mraW-related
583.m00681	-1.20476	0.00728972	WD-40 repeat-containing protein
20.m05947	-1.2043	0.014737	hypothetical protein
42.m03476	-1.20415	0.0266631	transmembrane amino acid transporter, putative
57.m01824	-1.20405	0.00223463	hypothetical protein
20.m03816	-1.20386	0.00607678	AP2 hypothetical protein
55.m00005	-1.20341	0.0098214	apical membrane antigen 1, putative
44.m04643	-1.20323	0.0363067	tuftelin interacting protein 11-related
65.m01144	-1.20279	0.034057	hypothetical protein
41.m00027	-1.2026	8.59427e-05	multisynthetase complex auxiliary component p43, putative
33.m01302	-1.20234	0.0396839	D-3-phosphoglycerate dehydrogenase, putative
20.m03791	-1.20099	0.0154233	hypothetical protein
55.m00270	-1.20074	0.0241542	cAMP-specific 3',5'-cyclic phosphodiesterase, putative
42.m05851	-1.20063	0.0478045	GPI-anchored surface antigen SRS4, putative
55.m05052	-1.2	0.00254151	hypothetical protein
50.m03419	-1.19998	0.0147289	hypothetical protein
55.m05107	-1.19997	0.0046104	hypothetical protein
20.m03828	-1.19962	0.00414616	isy1-like splicing family domain-containing protein
49.m00048	-1.19881	0.00267794	p36 protein
541.m00143	-1.19844	0.0243128	methionine aminopeptidase, type II, putative
80.m03987	-1.19825	0.000410494	hypothetical protein
41.m01379	-1.19824	0.00375907	14 kDa phosphohistidine phosphatase, putative
59.m00022	-1.19809	0.0265189	mRNA (2'-O-methyladenosine-N(6)-)-methyltransferase, putative
583.m05551	-1.19786	0.00520697
80.m00074	-1.19563	0.000851103	hypothetical protein, conserved
55.m05008	-1.19476	5.60159e-05	eukaryotic translation initiation factor 1A, putative
33.m01359	-1.19403	0.0342719	hypothetical protein
38.m00015	-1.19391	0.000943863	nuclear movement domain-containing protein
55.m04645	-1.19287	0.0079355	glycerophosphoryl diester phosphodiesterase protein, putative
86.m00370	-1.19285	0.0112248	hypothetical protein
41.m01389	-1.19228	0.0190612	MORN repeat-containing protein
113.m00782	-1.19168	0.00074183	myosin light chain-related
583.m00628	-1.19107	0.000224636	hypothetical protein, conserved
42.m00013	-1.19056	0.0188045	dense granule protein 3
46.m01681	-1.19011	0.00681053	IBR domain-containing protein
583.m05642	-1.19007	0.00275295	splicing factor 3b subunit 10, putative
44.m06354	-1.18943	0.00215267	protein kinase (incomplete catalytic triad)
55.m08218	-1.18923	0.000694394	actin, putative
542.m00219	-1.1892	0.00347974	hypothetical protein
49.m00041	-1.18915	0.0055014	met-10 domain-containing protein
33.m02213	-1.18829	0.00902268	centromere/microtubule binding protein, putative
57.m03088	-1.18708	0.0091368	hypothetical protein
25.m02937	-1.18693	0.000684856	phosphatase, putative
20.m03899	-1.18677	0.0374325	dual-specificity phosphatase laforin, putative
50.m05654	-1.18664	0.0476991	nuclear movement domain-containing protein
50.m03194	-1.18643	0.0321319	AP2 hypothetical protein
35.m00936	-1.18634	0.0344267	myb-like DNA-binding domain-containing protein / Zinc finger, ZZ type domain-containing protein
59.m03415	-1.18576	0.0473614	dense granular protein GRA10
38.m00017	-1.18529	0.000240317	dihydrolipoamide succinyltransferase component of 2-oxoglutaratedehydrogenase complex, putative
57.m01815	-1.18461	0.00625926	sec7 domain-containing protein
49.m00010	-1.18432	0.00928229	PKC-interacting cousin of thioredoxin, putative
583.m05332	-1.18408	0.0385188	Spc97 / Spc98 family domain-containing protein
583.m05617	-1.18344	0.000464954	adapter-related protein complex, putative
86.m00385	-1.18342	0.00930573	ubiquitin-transferase domain-containing protein
44.m00010	-1.1821	0.028834	SAG1-related sequence 2
42.m03451	-1.18148	0.00630577	hypothetical protein
37.m00750	-1.18111	0.00442426	splicing factor, putative
55.m04927	-1.18045	0.0404481	jmjC domain-containing protein
49.m07249	-1.18029	0.0154998	cytidine and deoxycytidylate deaminase zinc-binding domain containing protein
583.m05589	-1.17964	0.0157105	hypothetical protein, conserved
49.m07206	-1.17959	0.0375158	hypothetical protein
20.m03706	-1.17877	0.0486086	hypothetical protein
583.m11414	-1.17845	0.0142379	hypothetical protein
76.m01656	-1.17819	0.00178764	hypothetical protein
42.m03412	-1.17783	0.0225417	hypothetical protein
8.m00375	-1.177	0.00416217	hypothetical protein
83.m01230	-1.17664	0.00019818	transcription elongation factor (TFIIS), putative
83.m01298	-1.17651	0.030336	ssl1-like family domain-containing protein
27.m01468	-1.1764	0.0110411	TB2/DP1, HVA22 domain-containing protein
540.m00194	-1.17639	0.0050091	retinitis pigmentosa GTPase regulator-related
42.m00102	-1.17628	0.0168264	splicing factor 3A subunit 2, putative
20.m05894	-1.17623	4.94415e-05	hypothetical protein
50.m03399	-1.17436	0.00297501	acyl-CoA-binding protein, putative
52.m02721	-1.17428	0.0242164	60S ribosomal protein L39, putative
50.m03154	-1.17272	0.0163601	thrombospondin type 1 domain-containing protein
583.m00672	-1.17237	0.0223129	hypothetical protein
44.m04618	-1.17155	0.0349573	DNA-directed RNA polymerase II, putative
55.m10265	-1.17126	0.0220864	hypothetical protein
37.m01065	-1.17093	0.0205253	hypothetical protein
55.m04702	-1.17088	0.00320501	L-type amino acid transporter-related
25.m01803	-1.16993	0.0203674	RNA recognition motif-containing protein
55.m00244	-1.16946	0.0364529	ankyrin repeat-containing protein
583.m05647	-1.16929	0.0150874	hypothetical protein
46.m00007	-1.16917	0.00386647	deoxyhypusine synthase, putative
20.m03881	-1.16904	0.000834267	phosphoglycerate mutase domain protein-related
42.m00037	-1.169	0.0329162	40S ribosomal protein S18, putative
59.m00025	-1.1682	0.011252	zinc finger DHHC domain-containing protein
59.m00089	-1.16792	0.0245938	dense granule protein 1 / major antigenp24
33.m01349	-1.16752	0.0263552	splicing factor U2AF-associated protein, related
20.m03679	-1.16646	0.00422889	hypothetical protein, conserved
55.m08208	-1.16605	0.00107476	hypothetical protein
52.m01628	-1.16578	0.000635084	serine carboxypeptidase S28, putative
86.m00374	-1.16558	0.0201719	got1-like family domain-containing protein
27.m00845	-1.16547	0.00186608	hypothetical protein, peptidyl-tRNA hydrolase PTH2 domain-containing protein
83.m01245	-1.16537	0.00788072	thioredoxin, putative
41.m01275	-1.16527	0.0441303	acetyltransferase domain-containing protein
65.m00026	-1.165	0.00418972	G-patch domain-containing protein
583.m09119	-1.16426	0.0439746	hypothetical protein
50.m00067	-1.16326	0.0374123	40S ribosomal protein S8, putative
80.m00003	-1.16217	0.0218519	glyceraldehyde-3-phosphate dehydrogenase
31.m00908	-1.16158	0.000775887	RNA helicase, putative
55.m00279	-1.16131	0.0048653	hypothetical protein, conserved
37.m00753	-1.15916	0.021188	40s ribosomal protein S27, putative
55.m04894	-1.15893	0.0226227	N-acetlytransferase-related
42.m00116	-1.15854	0.0071401	adenylate kinase, putative
31.m00920	-1.15814	0.00713728	hypothetical protein
50.m03167	-1.15777	0.00710514	hypothetical protein
38.m00006	-1.15771	0.00350306	histone H3.3 variant
27.m00859	-1.15681	0.00069999	hypothetical protein
583.m05337	-1.15423	0.00360483	hypothetical protein, conserved
49.m03301	-1.15362	0.03127	hypothetical protein
64.m00337	-1.15253	0.0298569	microneme protein, putative
44.m04616	-1.15189	0.032332	hypothetical protein
583.m00589	-1.15161	0.0120668	ribosomal protein L33, putative
20.m03903	-1.15035	0.019175	40S ribosomal protein S12, putative
44.m02738	-1.15	0.00345233	hypothetical protein
41.m01384	-1.14953	0.00254645	coproporphyrinogen oxidase, putative
41.m01323	-1.1483	0.0469876	hypothetical protein
35.m00026	-1.14811	0.00779223	ATP-dependent RNA helicase, putative
83.m01228	-1.14773	0.00121776	hypothetical protein
80.m02232	-1.14648	0.0282304	SNM1 protein
59.m00050	-1.14595	0.0172777	1-O-acylceramide synthase-related
25.m00197	-1.14451	0.0321425	vacuolar ATP synthase subunit H, putative
20.m00390	-1.14414	0.00355541	hypothetical protein
583.m00001	-1.14295	0.02028	SAG1-related sequence 3
65.m02505	-1.14285	0.0418121	hypothetical protein
80.m02335	-1.1422	0.0174867	40S ribosomal protein S30, putative
80.m02328	-1.14162	0.0393288	RNA helicase, putative
57.m01690	-1.14148	0.0308659	heterogeneous nuclear ribonucleoproteins-related
583.m00671	-1.1403	0.0114139	serine/threonine-protein kinase PRP4 homolog, putative
583.m00696	-1.1398	0.00463694	protein-L-isoaspartate O-methyltransferase, putative
55.m04763	-1.13969	0.0352675	hypothetical protein
57.m01803	-1.13953	0.0139476	clpB protein-related
31.m00909	-1.13876	0.0200477	hypothetical protein
65.m01193	-1.13863	0.0376278	glucose-6-phosphate dehydrogenase, putative
44.m02771	-1.13777	0.00928152	hypothetical protein
80.m02220	-1.13692	0.0249781	60s ribosomal protein L19, putative
55.m00016	-1.13674	0.00654515	DnaJ domain-containing protein
583.m05718	-1.13652	0.0358624	rhoptry protein, putative
44.m02718	-1.13591	0.0418073	protein phosphatase 2C, putative
49.m03096	-1.13498	0.013252	60s ribosomal protein L36, putative
80.m02240	-1.13494	0.018497	ubiquitin / ribosomal protein CEP52 fusion protein, putative
42.m05840	-1.13483	0.0174245	DNA-directed RNA polymerase II largest subunit, putative
20.m03885	-1.13469	0.0403723	hypothetical protein
46.m01668	-1.13369	0.000527841	sedoheptulose-1,7 bisphosphatase, putative
20.m03792	-1.13344	0.00508992	hypothetical protein
94.m00031	-1.13311	0.0377461	hypothetical protein
49.m00042	-1.13287	0.0494741	hypothetical protein
55.m04760	-1.1328	0.0473586	hypothetical protein
55.m05004	-1.13245	0.0457448	60S ribosomal protein L18a, putative
42.m03638	-1.1323	0.00329133	hypothetical protein
83.m01278	-1.1323	0.0104471	eukaryotic translation initiation factor 3, putative
41.m01352	-1.13166	0.0434315	hypothetical protein
52.m03460	-1.13073	0.0171339	hypothetical protein
59.m06118	-1.12979	0.011932	hypothetical protein
80.m02140	-1.12738	0.0164061	hypothetical protein
37.m00743	-1.1272	0.0164973	glutaminyl-tRNA synthetase, putative
57.m03975	-1.1271	0.0312238	hypothetical protein
28.m00429	-1.12672	0.00686831	hypothetical protein
59.m00061	-1.12633	0.00262423	mitochondrial 2-oxoglutarate/malate carrier protein, putative
33.m01383	-1.12629	0.0127876	hypothetical protein
583.m00674	-1.12577	0.0112053	isocitrate dehydrogenase, putative
583.m11442	-1.1256	0.00788756	hypothetical protein
583.m05588	-1.12496	0.00124119	RNA recognition motif 2 domain-containing protein
583.m05633	-1.12269	0.0170862	splicing factor 3B subunit 2, putative
55.m00201	-1.12232	0.0315767	hypothetical protein
42.m05836	-1.12217	0.0161489	hypothetical protein
551.m00220	-1.12163	0.00461515	tubulin-tyrosine ligase family domain-containing protein
55.m05100	-1.11916	0.0219272	ubiquitin-conjugating enzyme domain-containing protein
113.m01289	-1.11902	0.00557787	hypothetical protein
41.m00037	-1.11657	0.000372642	PUA domain-containing, cell cycle regulator protein, putative
42.m03344	-1.11643	0.0214028	PHD-finger domain-containing protein
50.m03231	-1.11625	0.0330754	60S ribosomal protein L26, putative
49.m00019	-1.11548	0.0212088	cyclophilin, putative
59.m03495	-1.11534	0.0307685	hypothetical protein
55.m00189	-1.11411	0.0302619	60S ribosomal protein L13, putative
20.m03648	-1.11409	0.0153647	hypothetical protein
49.m03125	-1.11388	0.0117001	multidrug resistance protein, putative / ABC transporter, putative
59.m00003	-1.11309	0.0467693	heat shock protein 70, putative
59.m00023	-1.11223	0.0378968	hypothetical protein
55.m05037	-1.11197	0.0452822	citrate synthase, putative
50.m03125	-1.11176	0.0108546	G10 protein homolog, putative
8.m00176	-1.10968	0.0402324	PAN domain-containing protein
86.m00366	-1.10958	0.0199236	hypothetical protein
583.m05762	-1.10927	0.00919098	hypothetical protein
50.m00019	-1.10882	0.00326301	GRA9 protein, putative
583.m00019	-1.10719	0.0103427	hypothetical protein
57.m01820	-1.10685	0.0255333	cyclin, N-terminal domain-containing protein
83.m00005	-1.10615	0.0368799	carboxyvinyl-carboxyphosphonate phosphorylmutase, putative
59.m00027	-1.10507	0.033594	MIF4G domain-containing protein
49.m03158	-1.10468	0.036427	WD domain, G-beta repeat-containing protein
35.m00015	-1.10438	0.00147527	non-muscle myosin heavy chain-related
80.m00057	-1.10397	0.0185198	polypyrimidine track-binding protein, putative
583.m05357	-1.10381	0.0387125	heat shock protein 90, putative
55.m00240	-1.10119	0.0341538	hypothetical protein
20.m03930	-1.10063	0.043132	20k cyclophilin
83.m01263	-1.09973	0.0313565	ubiquitin carboxyl-terminal hydrolase, putative
52.m01550	-1.09785	0.0431871	hypothetical protein, conserved
49.m00009	-1.09781	0.013018	tudor domain-containing protein / staphylococcal nuclease homologue domain-containing protein
37.m00001	-1.0976	0.00902411	peroxiredoxin
83.m00018	-1.09742	0.00849426	ribosomal protein L20, putative
49.m00040	-1.09739	0.0293984	60S ribosomal protein L24, putative
65.m01175	-1.09678	0.0166105	hypothetical protein, conserved
57.m03103	-1.09418	0.0194298	mago nashi protein, putative
42.m03543	-1.09249	0.048735	hypothetical protein
42.m00104	-1.09246	0.021955	hypothetical protein
44.m00003	-1.09236	0.0378576	R1 protein
44.m04694	-1.09213	0.00932121	kelch motif domain-containing protein
113.m00810	-1.09184	0.0432593	snRNP (small nuclear ribonucleoprotein, an RNA helicase) protein, putative
42.m03368	-1.08977	0.03129	transcription factor S-II (TFIIS) central domain-containing protein
41.m03142	-1.0885	0.0363793	hypothetical protein
641.m00008	-1.08836	0.0328341	ras-related protein RAB11B, putative
55.m10249	-1.08529	0.0247336	hypothetical protein
583.m00670	-1.08007	0.0271355	eukaryotic translation initiation factor 2 alpha subunit, putative
44.m02575	-1.06827	0.0303387	bolA-like protein-related
55.m04649	-1.06699	0.0310598	ATP-dependent helicase, putaive
38.m01113	-1.06383	0.00830464	heat shock protein, putative
50.m03067	-1.04802	0.0466614	mitotic checkpoint protein BUB3, putative
83.m01212	-1.04053	0.048999	variably charged protein X-C-related / VCX-C protein-related

## Sheet: GCN5-A KO up-regulated
Gene ID	Fold change	p value	Product description
80.m02300	31.1334	0.0173976	serine palmitoyltransferase, putative
583.m05478	27.1991	0.00450637	hypothetical protein
83.m01238	22.7311	3.07158e-08	hypothetical protein
162.m00312	17.4179	0.00583828	GPI-anchored surface antigen, putative
46.m01731	15.8239	0.00818544	hypothetical protein
50.m03322	14.1146	0.00186365	hypothetical protein
42.m03469	11.023	0.0215813	malonyl CoA-acyl carrier protein transacylase, putative
76.m01603	10.9135	0.00383005	hypothetical protein
52.m01578	10.849	1.66703e-06	conserved hypothetical protein
23.m00015	9.62926	0.0255219	SRS domain-containing surface antigen, putative
55.m00162	8.84317	0.000356671	hypothetical protein
33.m01313	8.46855	0.0193392	1-deoxy-D-xylulose 5-phosphate reductoisomerase, putative
541.m02517	7.5411	0.0489493	conserved hypothetical protein
46.m02888	7.51985	1.16084e-05	hypothetical protein
49.m03417	7.51195	0.0425133	hypothetical protein
41.m02360	7.10979	0.0271691	aminopeptidase N, putative
113.m01573	7.09639	0.038111	hypothetical protein
80.m00083	6.72727	0.0196329	ABC transporter, putative
33.m01340	6.72012	0.00677308	hypothetical protein
65.m01120	6.69747	0.0363579	hypothetical protein
57.m01715	6.67632	0.0310663	choline/ethanolamine kinase, putative
49.m07199	6.55214	0.0433414	hypothetical protein
65.m02534	6.52816	0.0380911	hypothetical protein
72.m00003	6.37957	1.69787e-05	p18 surface antigen
52.m01630	6.31446	0.0305005	SRS domain-containing protein
162.m00311	6.29704	0.000102743	SRS domain-containing protein
23.m00150	6.23185	0.00052764	SAG2 related antigen, putative
59.m03630	6.1676	0.0366647	hypothetical protein
41.m00004	6.13311	0.0465266	acetyl-CoA carboxylase, putative
23.m00149	6.1088	2.49903e-06	SAG2 related antigen, putative
76.m01623	5.82036	0.0306863	hypothetical protein
39.m00621	5.30645	0.0365644	ribonuclease H, putative
39.m00361	5.15161	0.00989588	hypothetical protein
162.m00313	5.12298	1.60342e-06	GPI-anchored surface antigen, putative
83.m01210	4.99481	0.000339024	hypothetical protein
541.m01207	4.86874	0.00336479	dihydrolipoamid dehydrogenase, putative
37.m00740	4.86549	7.35057e-05	hypothetical protein
50.m03083	4.63575	0.00732647	pyruvate dehydrogenase, putative
583.m05680	4.40107	1.16819e-06	SRS domain-containing surface antigen, putative
583.m05620	4.35056	0.00439492	hypothetical protein
37.m00770	4.33262	0.0231569	oxidoreductase, putative
37.m00739	4.27426	0.000557019	hypothetical protein
49.m03117	4.22869	0.0262007	GDP-mannose 4,6 dehydratase, putative
33.m02193	4.16854	0.00436691	hypothetical protein
20.m03817	4.15828	0.00446527	hypothetical protein
25.m01768	4.14237	0.000496301	kinesin motor domain-containing protein
583.m05693	4.13754	0.000296213	hypothetical protein
83.m01248	4.05085	0.00984344	yrdC domain protein
38.m01050	3.95788	0.00341188	conserved hypothetical protein
37.m01278	3.95655	0.0214263	hypothetical protein
46.m01732	3.86902	0.0267164	hypothetical protein
52.m01667	3.86469	0.00349748	protein kinase-related
59.m03663	3.79669	0.00546977	SRS domain-containing surface antigen, putative
55.m08197	3.77317	0.000550112	hypothetical protein
55.m10326	3.73839	0.012065	hypothetical protein
44.m02516	3.71575	0.000473	zinc finger (CCCH type) protein, putative
64.m00345	3.6361	0.00527647	cytochrome b5, putative
59.m03360	3.58274	0.00556027	hypothetical protein
76.m01642	3.55241	5.85213e-07	PAN domain-containing protein
583.m05287	3.54373	0.012032	SAG2 related antigen SAG2C, putative
49.m03396	3.53255	0.0445027	microneme protein, putative
59.m07783	3.47838	0.00764476	cysteine protease domain containing protein
145.m00592	3.46909	0.000836408	SNARE domain-containing protein
41.m01331	3.45438	0.00744209	phosphoglycerate kinase, putative
80.m02185	3.43151	0.0087166	hypothetical protein
542.m00223	3.40571	0.00170639	thymidylate kinase, putative
44.m02804	3.3903	0.000350175	integral membrane transporter
59.m03459	3.38235	0.0453337	biotin carboxyl carrier protein, putative
42.m03579	3.37673	0.00828428	microtubule-associated protein RP/EB family member 3, putative
49.m03245	3.37493	0.00250891	molybdenum cofactor biosynthesis protein c, putative
46.m03691	3.37371	0.000357941	cytochrome b, putative
41.m00032	3.37211	0.000279267	aldehyde dehydrogenase, putative
20.m03790	3.36923	0.0485757	hypothetical protein
50.m00011	3.35815	0.00259861	enoyl-acyl carrier reductase
49.m03154	3.33474	0.00216433	serine:pyruvate/alanine:glyoxylate aminotransferase, putative
55.m04637	3.32377	0.000468393	hypothetical protein
50.m03076	3.32216	0.010507	origin recognition complex subunit 2-related
46.m01736	3.30179	0.00148278	hypothetical protein
55.m04926	3.2954	2.08029e-05	histone H2A, putative
641.m01537	3.28335	0.0131944	DNA polymerase epsilon catalytic subunit, putative
162.m00506	3.27901	0.0117746	NAD(P) transhydrogenase, beta subunit, putative
50.m00029	3.27011	0.033684	1,4-alpha-glucan branching enzyme, putative
49.m03421	3.25034	0.0183356	hypothetical protein
25.m00004	3.24466	0.00101971	SAG2 related antigen SAG2B
113.m00769	3.22028	0.00841519	membrane transporter PFB0465c
80.m02341	3.20949	0.00270824	hypothetical protein
25.m01843	3.1997	0.00274337	thrombospondin type 1 domain-containing protein
20.m00378	3.19924	0.00113764	hypothetical protein
44.m05934	3.18461	0.000621803	hypothetical protein
583.m05491	3.1685	0.00505925	hypothetical protein
44.m04665	3.16431	0.00290714	cell wall protein-related
162.m00310	3.15695	0.0312122	GPI-anchored surface antigen, putative
59.m03696	3.15301	0.000101329	hypothetical protein
29.m00019	3.15293	0.0109564	hypothetical protein
20.m03976	3.15098	0.000260067	hypothetical protein
44.m00012	3.14643	0.00821286	3-oxoacyl-synthase, putative / acyl-carrier-protein, putative
541.m02061	3.13566	0.0399164	hypothetical protein
583.m05714	3.13053	0.0360539	hypothetical protein
583.m05771	3.10624	0.00782889	hypothetical protein
50.m03138	3.10484	0.000266139	acylamino-acid-releasing enzyme, putative
55.m04948	3.09374	0.00401769	hypothetical protein
583.m05316	3.09338	0.000492396	alpha-N-acetylgalactosaminidase, putative
59.m06055	3.08061	9.57103e-06	hypothetical protein
44.m00032	3.07587	0.00147864	glucosamine--fructose-6-phosphate aminotransferase [isomerizing], putative
25.m01818	3.05839	5.35502e-05	mitochondrial carrier domain-containing protein
83.m00003	3.03143	0.00878288	ribonucleoside-diphosphate reductase, large subunit, putative
76.m01588	3.02584	0.00140719	hypothetical protein
55.m00255	3.02453	0.00262875	DNA primase small subunit, putative
59.m03483	2.9967	0.000782058	hypothetical protein
541.m01238	2.99668	0.00309804	hypothetical protein
20.m00373	2.99262	0.0148705	biotin requiring domain-containing protein / 2-oxo acid dehydrogenases acyltransferase catalytic domain-containing protein
80.m02273	2.98856	0.0104322	ABC transporter, putative
113.m01584	2.97531	0.015337	hypothetical protein
33.m01325	2.96551	0.00694071	DNA replication licensing factor, putative
583.m11406	2.95368	0.0367712	hypothetical protein
583.m05632	2.93379	0.013349	dolichyl pyrophosphate Glc1Man9GlcNAc2 alpha-1,3-glucosyltransferase, putative
113.m00762	2.9328	0.00022953	MORN repeat-containing protein
641.m01515	2.91867	0.0215439	hypothetical protein
63.m00337	2.91725	0.000566506	hypothetical protein
52.m03442	2.91313	0.00166082	hypothetical protein
65.m01169	2.89738	0.000246431	D4 dopamine receptor-related
46.m02891	2.87142	0.0169447	hypothetical protein
38.m01089	2.86476	0.00510299	hypothetical protein
42.m07402	2.8325	0.000409667	CutA1 divalent ion tolerance domain-containing protein
80.m02277	2.80396	0.00366989	trichohyalin-related
55.m00175	2.79712	0.0010495	elongation factor Tu, putative
641.m00168	2.79273	0.00240114	malate dehydrogenase, putative
55.m04676	2.78413	0.00430451	hypothetical protein
55.m04698	2.77977	0.00113935	prefoldin subunit 3, putative
65.m01188	2.7777	0.000346698	pyridoxal-dependent decarboxylase, putative
20.m03859	2.77677	0.00661017	GTP-binding conserved hypothetical domain-containing protein
57.m00028	2.74996	0.00329525	isocitrate dehydrogenase, putative
42.m07425	2.74326	0.000255957	conserved hypothetical protein
641.m00011	2.74272	0.00555045	proliferating cell nuclear antigen 2, putative
145.m00333	2.74203	0.0084863	cysteine desulfurase, putative
50.m03182	2.73911	0.00155543	glutaredoxin-related domain-containing protein
57.m03104	2.72331	0.00103748	DNA-directed RNA polymerase I, putative
49.m03276	2.71858	0.00195805	protein kinase domain-containing protein
83.m02696	2.70033	0.00133574	hypothetical protein
59.m03654	2.69402	0.0213896	DNA repair protein, putative
59.m03440	2.68239	0.00127205	actin-like protein, putative
52.m01680	2.67802	7.43329e-05	hypothetical protein
38.m01037	2.67713	0.00558736	hypothetical protein
42.m00103	2.67098	0.00351749	DNA-binding protein HU, putative
80.m02294	2.66527	0.000189552	hypothetical protein
641.m00181	2.66526	0.000386857	hypothetical protein
50.m03094	2.66343	0.00548498	conserved hypothetical protein
57.m03127	2.66328	0.0165554	hypothetical protein
59.m03702	2.66139	0.00180236	TGF-beta resistance-associated protein-related
55.m10283	2.65312	0.00035147	hypothetical protein
76.m01698	2.64862	0.00377628	hypothetical protein
55.m04942	2.64634	0.000231603	histone H2A, putative
76.m01567	2.6436	0.000506823	pyruvate carboxylase, putative
55.m00202	2.64047	0.00976521	hypothetical protein
55.m00019	2.63966	0.00345212	acyl carrier protein
145.m00336	2.63713	0.00704374	hypothetical protein
37.m00759	2.62943	0.000958417	hypothetical protein
55.m08192	2.62561	0.000356544	hypothetical protein
59.m03618	2.62275	0.00286735	transketolase, putative
583.m05505	2.60925	0.00906321	hypothetical protein
59.m03538	2.59946	0.00361935	poly [ADP-ribose] polymerase-1, putative
641.m03146	2.58824	0.0263412	DNA replication inhibitor plutonium-related
55.m10281	2.58186	0.000378301	hypothetical protein
52.m01611	2.57492	0.000292111	GTP cyclohydrolase I, putative
49.m00049	2.5709	0.00996972	DNA replication licensing factor, putative
74.m00977	2.57012	0.00213697	hypothetical protein
49.m05689	2.57007	0.00369703	hypothetical protein
50.m00018	2.56992	0.000119911	adenosine kinase
541.m02039	2.56809	0.000125855	histone H2B, putative
49.m03407	2.56139	8.63801e-05	hypothetical protein
44.m02820	2.55524	0.00703585	hypothetical protein
76.m01563	2.54378	0.0452234	DNA polymerase I, putative
50.m03280	2.54316	0.0147337	ras family domain-containing protein
55.m04865	2.54224	0.000339873	microneme protein, putative
59.m03665	2.54195	0.00218629	SRS domain-containing surface antigen, putative
20.m05883	2.539	0.00707784	hypothetical protein
55.m04883	2.53814	0.0181701	HEC/Ndc80p family protein, putative
44.m02770	2.52241	0.00993416	deoxyuridine 5'-triphosphate nucleotidohydrolase, putative
83.m01194	2.52089	0.00832105	hypothetical protein
80.m00077	2.51443	0.00434905	cation-transporting ATPase, putative
26.m00236	2.51121	0.00200456	serine/threonine-protein kinase, putative
44.m02574	2.50828	7.64807e-05	acetyltransferase domain-containing protein
645.m00546	2.49662	0.000159149	hypothetical protein
86.m00387	2.49534	0.0109039	TPR domain-containing protein
50.m05676	2.49341	0.00021964	hypothetical protein
76.m01556	2.48899	0.0290022	hypothetical protein
49.m05715	2.46724	0.0201856	OTU-like cysteine protease domain-containing protein
49.m05649	2.46669	0.00124509	bolA-like protein-related
542.m00227	2.46595	0.00254739	uridine phosphorylase, putative
74.m00438	2.46457	0.000319272	aldo/keto reductase family oxidoreductase, putative
57.m01755	2.46393	0.000152929	protein phosphatase 2C-related
27.m00875	2.46317	0.00853788	SET domain-containing protein
20.m00342	2.45276	0.00376566	replication factor A-related protein, putative
55.m04720	2.45275	0.00921184	SET domain-containing protein
583.m00704	2.45269	0.00142332	hypothetical protein
57.m01741	2.44793	0.0331537	TPR domain-containing protein
55.m10224	2.44019	0.0197792	hypothetical protein
145.m00338	2.42633	0.00353912	hypothetical protein
50.m03224	2.42577	0.00402179	SNF7 protein, putative
50.m05661	2.41572	0.0162998	hypothetical protein
541.m00145	2.41523	0.00203712	hypothetical protein
35.m00851	2.40829	0.00622118	helicase-related
641.m02550	2.40271	0.00680324	hypothetical protein
162.m00002	2.38973	0.0101212	NAD(P) transhydrogenase, alpha subunit, putative
33.m01374	2.3811	0.00191671	hypothetical protein
49.m03159	2.37588	2.98482e-05	ROP8, putative
49.m03251	2.3738	0.00491313	hypothetical protein
38.m01077	2.36499	0.00398371	DNA replication licensing factor, putative
541.m02037	2.36461	0.00549957	hypothetical protein
129.m00253	2.35674	0.000151868	pyruvate kinase, putative
65.m01205	2.34153	0.00332289	cell wall protein-related
20.m03724	2.33019	3.59761e-05	hypothetical protein
641.m00183	2.32901	0.0275653	queuine tRNA-ribosyltransferase, putative
65.m01150	2.3287	5.58747e-08	hypothetical protein
76.m01578	2.3266	0.000514867	hypothetical protein
59.m03503	2.32052	0.000870357	hypothetical protein
55.m10333	2.32032	0.00372305	conserved hypothetical protein
59.m06123	2.31895	0.00130102	hypothetical protein
55.m05019	2.31887	0.000905845	NADH-cytochrome B5 reductase, putative
64.m00327	2.31183	0.00166758	membrane skeletal protein IMC1-related
55.m04788	2.30845	7.7336e-06	rhoptry protein-related / protein kinase-related
20.m00367	2.30817	0.00161679	hypothetical protein
49.m03236	2.30449	0.0102217	L-type amino acid transporter-related
57.m01692	2.2978	0.000827251	SRS domain-containing, N-acetylglucosamine-phosphate mutase, putative
76.m03425	2.2961	0.014063	hypothetical protein
540.m00200	2.2877	0.00133698	DNA-damage inducible protein-related
80.m02180	2.28723	0.00517833	hypothetical protein
49.m03401	2.28672	0.0486547	adapter-related protein, putative
46.m01701	2.28436	0.0015817	lysine decarboxylase domain-containing protein
83.m01219	2.28285	0.0027423	poly(ADP)-ribose polymerase-related
44.m02604	2.2793	0.000824218	cyclophilin, putative
76.m01670	2.27788	0.000315222	peroxiredoxin family protein/glutaredoxin, putative
583.m05389	2.27103	0.00850975	apyrase, putative
145.m00343	2.27008	0.00126326	SNARE domain-containing protein
50.m03326	2.27007	2.31051e-05	mitochondrial carrier domain-containing protein
27.m00843	2.26815	0.00912057	hypothetical protein
44.m02519	2.25961	0.00590991	cell division control protein 2 homolog, putative / protein kinase, putative
583.m09175	2.25941	0.0015632	proteasome subunit beta type 3, putative
72.m00401	2.25731	0.00210252	hypothetical protein
72.m00379	2.25629	0.015861	hypothetical protein
57.m01701	2.25549	0.0475073	UDP-N-acetylhexosamine pyrophosphorylase, putative
48.m00100	2.25463	0.0118749	calcium-dependent protein kinase, putative / calmodulin-domain protein kinase, putative
76.m00012	2.25246	0.00422863	hypothetical protein
59.m03425	2.24866	0.0132967	hypothetical protein
583.m05402	2.24607	0.00348947	hypothetical protein
25.m01849	2.24541	0.0144716	anti-silencing protein 1, putative
80.m02236	2.24289	0.000207996	hypothetical protein
31.m00868	2.23872	0.00429942	hypothetical protein
50.m00068	2.23766	0.0270521	methionine aminopeptidase, putative
44.m05929	2.23143	0.00566783	hypothetical protein
64.m00342	2.23053	0.012062	tubulin epsilon chain, putative
76.m01549	2.23011	0.0179696	longevity-assurance (LAG1) domain-containing protein
49.m05731	2.22871	0.00234383	UDP-N-acetylglucosamine-1-phosphate transferase, putative
44.m02603	2.22755	0.0108861	hypothetical protein
46.m00006	2.22074	0.000258763	ethylene inducible protein, putative
55.m00072	2.21929	0.00205608	UMP-CMP kinase, putative
583.m11422	2.21847	0.00866191	hypothetical protein
49.m00030	2.21601	0.00579544	TCP-1/cpn60 family chaperonin, putative
27.m00081	2.21381	0.000581572	hypothetical protein
55.m10273	2.21074	0.00131539	hypothetical protein
55.m04660	2.20532	0.00475101	phosphatidylinositol-4-phosphate 5-kinase-related
59.m03687	2.20479	0.000913862	phosphatidylserine synthase I, putative
83.m00002	2.20408	0.0105092	beta-ketoacyl synthase, putative
52.m01539	2.20179	0.00119261	DNA polymerase epsilon p17 subunit, putative
113.m00801	2.20031	9.72132e-05	hypothetical protein
55.m08201	2.19854	0.00184332	vacuolar protein sorting 26, putative
59.m03561	2.19519	0.00922616	hypothetical protein
55.m00011	2.19104	0.000299983	hydroxymethyldihydropterin pyrophosphokinase-dihydropteroate synthase
80.m00049	2.186	0.00934185	hypothetical protein
41.m00022	2.18594	0.00976122	hypothetical protein
41.m01283	2.18578	0.00425238	hypothetical protein
55.m05059	2.18431	0.00581786	ubiquitin carboxyl-terminal hydrolase, putative
57.m01783	2.18225	0.00131582	hypothetical protein
25.m01789	2.17767	0.00143635	hypothetical protein
49.m03321	2.17495	0.00653294	hypothetical protein
83.m01242	2.17167	0.035678	hypothetical protein
49.m03114	2.17116	0.00294763	hypothetical protein
641.m01548	2.17109	0.000737018	L-type amino acid transporter-related
80.m02121	2.16799	8.33764e-05	hypothetical protein
541.m01182	2.16717	0.0102858	hypothetical protein
76.m03393	2.16511	0.000364632	conserved hypothetical protein
583.m05351	2.16509	0.000996867	U3 small nucleolar ribonucleoprotein protein, putative
49.m07196	2.1647	0.00260011	hypothetical protein
52.m00027	2.16265	0.0140785	hypothetical protein
49.m05646	2.1626	0.000141985	fatty acyl-CoA desaturase, putative
540.m00333	2.16015	0.0113317	oxidoreductase, putative
49.m03432	2.16001	2.86096e-05	glucoamylase S1/S2 precursor-related
59.m03392	2.15632	0.000249125	DNA polymerase alpha subunit-related
113.m01284	2.15515	0.0385783	hypothetical protein
645.m00329	2.15403	1.05425e-05	phosphatidylinositol glycan, class B-related
113.m00807	2.1495	0.00148207	aspartyl aminopeptidase, putative
55.m04610	2.14891	0.000432902	hypothetical protein
83.m02691	2.14537	0.000114092	hypothetical protein
55.m00168	2.14181	0.00503693	ATP synthase beta chain, putative
76.m01662	2.138	0.00181002	hypothetical protein
31.m00856	2.13651	0.0207167	myosin heavy chain-related
64.m00323	2.12728	0.00949554	protein kinase, putative
44.m02788	2.12693	0.00186612	hypothetical protein
20.m03683	2.1267	0.000473135	TPR domain-containing protein
52.m01596	2.11255	0.00305817	hypothetical protein
33.m01294	2.11082	0.00160716	protein antigen, putative
49.m03267	2.11071	0.00560356	3', 5'-cyclic nucleotide phosphodiesterase, putative
641.m00010	2.10996	0.000130796	UDP-N-acetyl-D-galactosamine:polypeptide N-acetylgalactosaminyltransferase T3, putative
49.m03088	2.10676	0.0134454	hypothetical protein
76.m01557	2.10355	0.0312608	inorganic pyrophosphatase-like protein
46.m01744	2.09877	0.0152415	DNA replication licensing factor, putative
35.m00848	2.09783	0.0234302	acetyl-CoA transporter, putative
20.m03692	2.09573	0.00164432	mucin-related
20.m07752	2.09467	0.0285113	hypothetical protein
59.m06062	2.0935	0.00215471	hypothetical protein
55.m00178	2.09291	0.000688952	hypothetical protein
76.m01625	2.0923	0.0128707	SRS domain-containing surface antigen, putative
49.m03167	2.09192	0.00155577	phosphomannomutase 2, putative
55.m04628	2.08835	0.0216302	2C-methyl-D-erythritol 2,4-cyclodiphosphate synthase, putative
55.m00101	2.08756	3.23135e-05	conserved hypothetical protein
57.m01793	2.08667	0.00256281	lysine decarboxylase domain-containing protein
42.m07435	2.08459	0.000191493	hypothetical protein
20.m05958	2.08202	6.42602e-06	hypothetical protein
551.m00229	2.07556	4.00807e-08	6-phosphogluconate dehydrogenase, putative
52.m01606	2.07353	0.0234745	importin-alpha re-exporter, putative
49.m03416	2.07188	0.00809684	tubulin-tyrosine ligase family protein
50.m03375	2.06243	0.00795379	26S proteasome regulatory particle non-ATPase subunit-related
80.m03967	2.05966	0.000433727	hypothetical protein
46.m01634	2.05904	1.64816e-05	transporter, putative
641.m00192	2.05764	0.00520243	TCP-1/cpn60 family chaperonin, putative
540.m00206	2.05243	0.00459492	ubiquitin-conjugating enzyme E2, putative
41.m02959	2.04842	0.0166065	hypothetical protein
44.m02594	2.04472	0.00410359	calcium-transporting ATPase, putative
25.m01884	2.04214	0.000584497	hypothetical protein
80.m03944	2.03963	0.00657423	hypothetical protein
49.m05714	2.03823	0.0377169	ribosomal protein L3p-related
42.m03360	2.03664	0.00483302	hypothetical protein
59.m03563	2.02998	0.000751688	KH domain-containing protein
49.m03283	2.02899	0.000372064	B-box zinc finger protein, putative
55.m04650	2.02853	0.00937803	conserved hypothetical protein
20.m03798	2.02472	0.00697489	conserved hypothetical protein
35.m00906	2.01983	0.0214452	DNA replication licensing factor, putative
39.m00354	2.01356	0.00123067	hypothetical protein
49.m03152	2.01279	0.000550237	proteasome subunit alpha type 4, subunit
80.m00050	2.00867	0.0088261	proteasome subunit beta type 1, putative
49.m03123	2.002	0.00261248	hypothetical protein
52.m00029	2.00055	0.00677189	alpha-galactosidase A, putative
583.m05570	1.99659	0.000708525	hypothetical protein
83.m00009	1.99651	0.00203618	DHHC zinc finger domain-containing protein
583.m00606	1.99648	0.00267391	hypothetical protein
583.m11425	1.9964	0.00276093	transporter-related
41.m01290	1.9963	0.0147942	hypothetical protein
44.m04672	1.99417	1.78901e-05	sepiapterin reductase, putative
583.m00629	1.99185	0.00559428	non-muscle myosin heavy chain, putative
38.m01890	1.99174	0.028085	DNA replication licensing factor, putative
77.m00088	1.98914	0.00372957	TCP-1/cpn60 family chaperonin, putative
641.m01470	1.98489	0.0136004	transketolase, putative
44.m02570	1.98476	6.60766e-05	hypothetical protein
83.m01266	1.98174	7.37403e-05	hypothetical protein
129.m00256	1.97974	0.00458598	cleft lip and palate transmembrane protein 1-related
57.m01834	1.97885	0.000151039	aquaporin-related
583.m09212	1.97778	0.0276592	hypothetical protein
46.m01716	1.97695	0.00131846	haloacid dehalogenase-like hydrolase domain-containing protein
583.m05687	1.97681	0.00153426	hypothetical protein
72.m00688	1.9763	0.00396403	proteasome A-type and B-type domain-containing protein
55.m04912	1.97503	0.000256532	DNA mismatch repair protein, putative
25.m01822	1.97495	0.00354443	hypothetical protein
86.m00652	1.9735	0.0368025	hypothetical protein
65.m01091	1.97308	0.00416213	endoplasmic reticulum retention receptor, putative
44.m02520	1.9706	0.0224447	conserved hypothetical protein
55.m04754	1.97042	0.00756629	hypothetical protein
80.m02201	1.97037	0.00157782	prefoldin subunit, putative
20.m03753	1.96965	6.41107e-05	para-aminobenzoate synthase, putative
583.m05330	1.96879	0.0171731	PEANUT1
20.m05919	1.9677	0.00224058	hypothetical protein
42.m00008	1.96654	0.00901916	adenosylhomocysteinase, putative
583.m00655	1.9664	7.36661e-05	nucleoredoxin-related
59.m00079	1.96544	0.000428949	hypothetical protein
55.m10244	1.96492	0.0468491	hypothetical protein
52.m01634	1.96227	0.00348457	hypothetical protein
50.m03291	1.96193	0.00456336	hypothetical protein
57.m03134	1.95794	0.00392294	hypothetical protein
42.m03288	1.95655	0.0243819	conserved hypothetical protein
72.m00413	1.95639	8.07818e-05	hypothetical protein
59.m03368	1.95632	0.00372434	phosphoinositide-dependent protein kinase, putative
80.m03951	1.95406	0.00379721	hypothetical protein
540.m00201	1.95402	0.00141076	eukaryotic peptide chain release factor subunit, putative
25.m02951	1.95263	0.00167866	formate/nitrite transporter-related
25.m00193	1.95119	0.00021009	hypothetical protein
76.m03427	1.9485	0.00929027	hypothetical protein
49.m03246	1.9467	0.0272597	ADP-ribosylation factor-related
59.m06112	1.94535	0.00973759	gamma-glutamyl phosphate reductase, putative
38.m01060	1.94414	0.00499324	cyclin-dependent kinase-related
39.m00331	1.94035	0.00239428	calmodulin, putative
25.m01833	1.93956	0.00773379	retinitis pigmentosa GTPase regulator-related
50.m00017	1.93805	0.00177907	proteasome subunit alpha type 5, putative
583.m05269	1.93616	0.00618503	hypothetical protein
44.m00007	1.93567	3.18896e-05	diacylglycerol acyltransferase, putative
31.m00893	1.93303	0.0225855	hypothetical protein
55.m04726	1.93145	0.00450881	mannose-1-phosphate guanylyltransferase, putative
583.m09143	1.92997	0.00643265	hypothetical protein
50.m07138	1.92674	0.000128907	hypothetical protein
42.m03610	1.92095	5.94436e-05	cytochrome c oxidase assembly factor, putative
46.m01743	1.91936	0.00882507	protein kinase-related
641.m01505	1.9193	4.13054e-05	deoxyribose-phosphate aldolase, putative
44.m02600	1.91862	0.00093347	hypothetical protein
76.m01555	1.91803	0.0316341	calcium/calmodulin-dependent protein kinase type II alpha chain, putative / calcium/calmodulin-dependent protein kinase type II delta chain, putative
55.m05114	1.91602	0.0107291	hypothetical protein
42.m03458	1.91599	3.09262e-06	UDP-glucose 4-epimerase, putative
59.m00091	1.91551	0.00291812	glyceraldehyde-3-phosphate dehydrogenase
583.m05440	1.91367	0.0334308	WD repeat domain-containing protein
23.m00001	1.91212	0.00225066	ribonucleotide-diphosphate reductase, small subunit, putative
59.m03518	1.91143	0.00526198	asparaginyl-tRNA synthetase, putative
38.m00013	1.91135	2.37187e-05	histidyl tRNA synthetase 2
76.m01668	1.91124	0.000743318	ribosomal protein S14p-related
41.m00029	1.911	2.24442e-06	glycolipid transfer protein-related
42.m03481	1.91053	0.00301796	hypothetical protein
80.m03941	1.91049	0.0456485	hypothetical protein
583.m11449	1.91023	0.00220363	hypothetical protein
64.m00350	1.90892	0.0293387	aminoalcoholphosphotransferase
57.m01731	1.90718	0.00455752	electron transfer flavoprotein-ubiquinone oxidoreductase, putative
83.m01184	1.90712	0.00161911	heat shock protein 90, putative
57.m01870	1.90549	0.0066009	hypothetical protein
31.m00938	1.90548	0.0445997	ppg3, putative
38.m01057	1.90542	0.000140088	hypothetical protein
20.m03718	1.90184	0.00164621	hypothetical protein
583.m05675	1.90081	0.0095737	hypothetical protein
38.m01078	1.899	0.000283629	proteasome subunit beta type 5, putative
50.m03273	1.89898	0.0285559	regulator of chromosome condensation domain-containing protein
80.m05039	1.89825	0.000175657	SRS domain containing protein
49.m05693	1.89757	0.00479824	hypothetical protein
50.m03390	1.89663	0.0112384	hypothetical protein
113.m01286	1.89643	0.0152418	hypothetical protein
583.m05359	1.8964	0.0231648	phosphatidylinositol-4-phosphate 5-kinase, putative
583.m00705	1.89614	0.00189636	cytochrome p450, putative
41.m01272	1.89609	0.00570826	conserved hypothetical protein
57.m00036	1.8938	3.28513e-05	conserved hypothetical protein
49.m03332	1.89361	0.00723065	hypothetical protein
52.m01587	1.89347	0.00142762	hypothetical protein
80.m02192	1.89098	0.00655392	adapter-related protein complex 3 beta 2 subunit, putative
42.m07423	1.88571	0.00500356	hypothetical protein
55.m10231	1.88547	0.00575878	NAD binding domain of 6-phosphogluconate dehydrogenase, putative
55.m05007	1.88402	0.00453282	ctr copper transporter domain-containing protein
113.m00001	1.88353	0.000950806	hypothetical protein
583.m05569	1.88335	0.00264678	hypothetical protein
55.m04704	1.88134	0.0184406	plectin-related
57.m01725	1.87928	0.0209642	hypothetical protein
44.m02661	1.87846	0.000156972	oligosaccharyl transferase STT3, putative
49.m03170	1.87743	0.00725249	hypothetical protein
55.m04879	1.87641	6.36905e-05	PH domain-containing protein
25.m02950	1.87522	0.000343006	hypothetical protein
50.m03243	1.87439	0.0488483	phosphatidylinositol 3- and 4-kinase domain-containing protein
59.m06103	1.87138	0.000932174	hypothetical protein
80.m02131	1.86544	0.0142341	phospholipase A2 activating protein-related
49.m00018	1.86489	0.00207523	emp24/gp25L/p24 family domain-containing, transmembrane protein, putative
44.m02731	1.86464	0.000943319	hypothetical protein
37.m00783	1.86426	0.00475327	conserved hypothetical protein
42.m00098	1.86331	0.00413098	26S proteasome regulatory ATPase subunit, putative
583.m05468	1.86282	0.00395074	hypothetical protein
76.m01608	1.8618	0.00880581	hypothetical protein
50.m03134	1.86141	0.00766844	hypothetical protein
39.m00356	1.86081	0.00599103	lysyl-tRNA synthetase-related
41.m01383	1.86035	0.00468106	dynein light chain, putative
583.m05445	1.86017	0.00495118	hypothetical protein
541.m00142	1.85925	0.00114926	hypothetical protein
50.m00016	1.85793	0.00408937	bifunctional dihydrofolate reductase-thymidylate synthase (DHFR-TS)
44.m02530	1.85732	0.0233455	hypothetical protein
57.m01784	1.85608	0.0109838	glycosyltransferase sugar-binding region containing DXD motif-containing protein
50.m00003	1.85447	0.00140071	glutathione reductase, putative
50.m05656	1.85172	0.0114271	mitochondrial carrier domain-containing protein
31.m00912	1.84938	0.00017376	hypothetical protein
49.m00037	1.84835	0.0313655	hypothetical protein
41.m01337	1.84717	0.00226532	hypothetical protein
44.m02569	1.84424	0.0022878	TCP-1/cpn60 family chaperonin, putative
35.m00919	1.84417	0.00142059	hypothetical protein
76.m01572	1.84376	0.000437611	ATP synthase, putative
55.m00068	1.84345	0.00910929	aminoalcoholphosphotransferase, putative
50.m05632	1.84169	0.000192532	dimethyladenosine transferase, putative
49.m00001	1.84057	0.0139261	myosin E, putative
76.m01605	1.83993	0.00798522	hypothetical protein
42.m03337	1.83638	0.0189148	hypothetical protein
59.m03543	1.83509	0.00993229	ATPase, AAA family domain-containing protein
80.m03982	1.83504	0.000660944	hypothetical protein
20.m03912	1.83461	0.00372299	elongation factor 2, putative
37.m00767	1.83449	0.000117565	hypothetical protein
48.m00099	1.83094	0.000791478	hypothetical protein
49.m03212	1.8302	0.000451488	maf-like protein, putative
59.m03471	1.82929	0.0016639	hypothetical protein
38.m01081	1.82869	0.00215935	mismatch repair protein-related
50.m03065	1.82788	0.000834557	hypothetical protein
42.m05844	1.8278	0.0055866	hypothetical protein
52.m00007	1.82636	0.00679937	proteasome subunit beta type 2, putative
113.m00774	1.82512	0.00136604	hypothetical protein
641.m02570	1.82387	0.0442385	hypothetical protein
80.m02257	1.82347	0.0250107	4-nitrophenylphosphatase, putative
46.m00021	1.82287	0.000359007	nifU protein, putative
55.m05062	1.82207	0.0041389	ubiquitin carboxyl-terminal hydrolase isozyme, putative
44.m00054	1.82176	0.000573217	nuclear transport factor 2 (ntf-2), putative
83.m02143	1.81946	0.0133321	sec1 family domain-containing protein
25.m01892	1.81565	0.0133309	syntaxin-related
83.m01271	1.81362	0.000918639	mitogen-activated protein kinase-related
583.m09110	1.80985	0.0014801	hypothetical protein
541.m01230	1.80834	0.0155384	dynein gamma chain, putative
86.m00376	1.80823	0.0209272	SET domain-containing protein
50.m00069	1.80748	0.0115608	thioredoxin, putative
50.m03327	1.80491	0.00254915	ATP synthase lipid-binding protein-related
59.m03645	1.80347	0.00101317	hypothetical protein
33.m01307	1.8034	0.00295334	hypothetical protein
583.m05758	1.80261	0.0005025	hypothetical protein
59.m03626	1.80234	0.00190517	3-hydroxyisobutyrate dehydrogenase, putative
55.m00010	1.80132	4.815e-05	UDP-N-acetyl-D-galactosamine:polypeptide N-acetylgalactosaminyltransferase T1, putative
26.m00235	1.80041	0.00207727	lava lamp protein-related / peripheral golgi protein-related
541.m01185	1.79994	0.000207854	ABC transporter, putative
52.m01529	1.79824	0.00538852	zinc finger DHHC domain-containing protein
641.m01523	1.79436	0.0477623	hypothetical protein
44.m02798	1.79402	0.00258187	hypothetical protein
44.m02714	1.79336	0.000479039	hypothetical protein
583.m05522	1.79319	0.0112828	hypothetical protein
38.m00011	1.78812	0.00456929	phosphoserine aminotransferase, putative
38.m01056	1.78643	0.00654474	SF-assemblin, putative
52.m01645	1.78487	0.0100736	hypothetical protein
641.m01562	1.78345	0.00790683	bradyzoite-specific surface protein, putative
583.m05490	1.78336	0.00458446	hypothetical protein
49.m03135	1.78148	0.00465006	hypothetical protein
145.m00604	1.78114	0.00372613	threonyl-tRNA synthetase, putative
25.m01773	1.78004	0.000379114	nucleolar RNA-associated protein-related
57.m01719	1.77961	0.000220781	hypothetical protein
583.m05371	1.77399	0.0456448	hypothetical protein
583.m11435	1.7719	0.000154661	hypothetical protein
57.m01883	1.77183	0.049755	hypothetical protein
41.m02358	1.77054	0.00128181	hypothetical protein
63.m00149	1.76944	0.0142095	conserved hypothetical protein
25.m00217	1.76842	0.000622235	proteasome PCI domain-containing protein
52.m01558	1.76821	0.00586619	hypothetical protein
57.m01858	1.76588	2.98211e-05	zinc finger (C3HC4 RING finger) protein, putative
49.m03279	1.76584	0.00601917	hypothetical protein
42.m03520	1.76386	0.00244579	hypothetical protein
55.m08212	1.7637	0.00413499	methionine aminopeptidase, putative
33.m01364	1.76318	0.00567562	hypothetical protein
583.m09195	1.76043	0.0103357	hypothetical protein
55.m04978	1.75977	0.0123539	kelch motif domain-containing protein
50.m00021	1.75868	0.0151515	tyrosyl-tRNA synthetase, putative
59.m03656	1.75596	4.12833e-05	phosphoglycerate mutase protein, putative
57.m01792	1.75575	0.00143462	hypothetical protein
42.m03619	1.75538	0.0161179	phospholipase/carboxylesterase, putative
541.m02062	1.75467	0.000440408	hypothetical protein
20.m05977	1.75432	7.86876e-05	hypothetical protein
44.m02696	1.74941	0.00118425	hypothetical protein
59.m03651	1.74629	0.0149527	DNA-directed RNA polymerase III subunit, putative
52.m00015	1.74621	0.00249195	PPR repeat-containing protein
20.m03680	1.74533	0.000186566	eukaryotic aspartyl protease, putative
641.m00172	1.74462	0.0138421	SF-assemblin-related
49.m05695	1.74421	0.00107377	hypothetical protein
583.m05444	1.74378	0.00161923	FUN14 family domain-containing protein
80.m02330	1.74289	0.0398031	hypothetical protein
583.m05499	1.73846	0.00144878	conserved hypothetical protein
64.m00329	1.73679	0.0109836	clp ATP-binding chain B1, putative
645.m00326	1.73617	0.0114645	cell division protein 48, putative
641.m01563	1.73583	0.000308156	bradyzoite surface antigen BSR4, putative
55.m05072	1.73544	0.00244566	hypothetical protein
20.m05878	1.73519	0.0366083	kinesin motor domain-containing protein
46.m01643	1.73433	0.00346522	hypothetical protein
52.m00004	1.73393	0.00418347	integral membrane protein DUF6 domain-containing protein
641.m01483	1.73357	0.000792849	hypothetical protein
33.m01373	1.73345	0.00164215	hypothetical protein
541.m01215	1.73147	0.000202761	DEAD/DEAH box helicase, putative
25.m01855	1.73133	0.0137455	conserved hypothetical protein
38.m00004	1.73071	0.00092335	ribosomal protein S9p-related
641.m02544	1.72908	0.0118714	hypothetical protein
49.m07231	1.72822	0.00468354	hypothetical protein
33.m02212	1.72717	7.26483e-05	hypothetical protein
49.m03179	1.72685	0.0101879	hypothetical protein
59.m03385	1.72595	0.00466869	hypothetical protein
551.m00022	1.72573	0.00661771	ATP-binding protein-related
25.m01749	1.72471	0.0048618	isoleucine-tRNA synthetase, putative
25.m01848	1.72405	0.000139448	regulator of chromosome condensation (RCC1) domain-containing protein
65.m01154	1.72239	0.0143005	hypothetical protein
65.m01192	1.71922	0.00222884	F-box domain-containing protein
38.m00012	1.71808	0.00322036	hypothetical protein
44.m05928	1.7178	0.00564059	hypothetical protein
129.m00252	1.71758	0.0170725	sodium/hydrogen exchanger, putative
44.m02678	1.71747	0.00673782	tola protein., putative
49.m03382	1.7174	0.0308992	hypothetical protein
583.m05578	1.71701	0.00548306	hypothetical protein
59.m03590	1.71654	0.0139985	hypothetical protein
46.m01590	1.71611	0.00245053	glycine hydroxymethyltransferase, putative
54.m00004	1.71517	0.0130817	cytochrome oxidase I
25.m01846	1.7149	0.00827471	hypothetical protein
20.m03905	1.71342	0.00580638	hypothetical protein
25.m01847	1.71247	0.0178662	hypothetical protein
49.m03252	1.71233	0.00784312	hemolysin, putative
42.m00101	1.70883	0.0347173	hypothetical protein
59.m00087	1.70768	0.00174179	TPR domain-containing protein
50.m03332	1.70713	0.0200976	hypothetical protein
55.m05021	1.70689	0.0238337	enterophilin-2L, putative
145.m00607	1.7026	0.000665275	mitochondrial carrier domain-containing protein
49.m03134	1.69977	0.00181019	histone H4, putative
49.m03216	1.69933	0.00236968	hypothetical protein
55.m04896	1.6992	0.0207323	hypothetical protein
50.m03302	1.69637	0.00634016	hypothetical protein
44.m02673	1.69607	0.0235252	hypothetical protein
59.m00090	1.6959	0.019382	coatomer protein gamma 2-subunit, putative
80.m02340	1.69518	0.0378412	nucleolar phosphoprotein (nucleolin), putative
50.m03356	1.69454	0.00614954	caltractin (centrin), putative
20.m03907	1.69435	0.000105533	fructose-1,6-bisphosphatase, putative
583.m11428	1.69259	0.040784	hypothetical protein
20.m00365	1.69146	0.0337398	nucleolar protein NOP5, putative
583.m05420	1.69117	0.00036168	myosin light chain TgMLC1-related
33.m01343	1.68981	0.000124902	hypothetical protein
44.m02816	1.68937	0.00499168	DNA polymerase delta small subunit, putative
52.m01619	1.68764	0.00151522	delta-aminolevulinic acid dehydratase, putative
55.m11056	1.68724	0.000458478	conserved hypothetical protein
42.m03287	1.68572	5.0269e-05	conserved hypothetical protein
162.m00326	1.6851	0.00564994	hypothetical protein
59.m00005	1.68486	0.0137979	protein transport protein Sec61 alpha subunit isoform 1, putative
59.m00086	1.68325	5.2898e-05	transport protein particle (TRAPP) component, Bet3 domain-containing protein
20.m03852	1.68306	6.65909e-05	hypothetical protein
20.m03811	1.68267	0.00409904	hypothetical protein
83.m01311	1.68248	0.0142099	hypothetical protein
20.m05986	1.68247	0.020646	formin-related protein
83.m00020	1.68189	0.00810906	translocation protein Sec62, putative
35.m00882	1.68113	0.0121645	proteasome subunit alpha type 3, putative
44.m02737	1.68067	0.0073963	phosphatase PTEN-related
35.m00895	1.6806	0.0183351	EF hand domain-containing protein
583.m00659	1.67968	0.00144938	endonuclease/exonuclease/phosphatase domain-containing protein
76.m01559	1.67778	2.82699e-05	leucine rich repeat protein, putative
49.m03081	1.67778	0.0138666	thioredoxin, putative
44.m02684	1.67651	0.00449345	ATP synthase gama chain, putative
583.m00694	1.67588	0.0112998	protein of unknown function domain-containing protein
583.m09099	1.67414	0.000869135	hypothetical protein
41.m00016	1.67361	0.00717792	ubiquitin carboxyl-terminal hydrolase, putative
25.m01851	1.67247	0.0167499	glycylpeptide N-tetradecanoyltransferase, putative
46.m01642	1.67119	0.016802	hypothetical protein
583.m05452	1.66976	0.0211633	platelet binding protein GspB, putative
583.m05764	1.66894	0.0161195	WD-40 repeats-containing protein
80.m02253	1.66822	0.0169779	uroporphyrinogen decarboxylase, putative
57.m01689	1.66811	0.00110202	hypothetical protein
20.m00348	1.66648	0.00255061	rab GDP dissociation inhibitor alpha, putative
645.m00003	1.66608	0.00282993	beta-hydroxyacyl-ACP dehydratase
44.m02526	1.66597	0.0296289	hypothetical protein
57.m01745	1.66574	0.0145604	hypothetical protein
65.m01132	1.66508	0.00794098	trypsin, putative
65.m01204	1.66424	0.00532728	hypothetical protein
583.m00018	1.66378	0.0351962	uracil phosphoribosyltransferase
42.m03485	1.66172	0.00931365	hypothetical protein
42.m00038	1.66003	0.00568158	nnucleoredoxin, putative
46.m01625	1.65826	7.91929e-05	surface antigen 5-related
46.m01712	1.65789	0.0252534	hypothetical protein
583.m05525	1.65777	0.0314884	hypothetical protein
42.m00026	1.65719	0.0222394	hypothetical protein
20.m03654	1.65662	0.0354206	hypothetical protein
46.m01616	1.65661	0.00261146	hypothetical protein
65.m02537	1.65626	0.000385512	conserved hypothetical protein
55.m04796	1.65576	0.00351487	hypothetical protein
41.m01286	1.65434	0.000188946	hypothetical protein
46.m01721	1.65353	0.0016914	hypothetical protein
27.m00862	1.65299	0.0344015	hypothetical protein
55.m04605	1.65214	0.0308771	NOL1/NOP2/sun family domain-containing protein
583.m09163	1.65127	0.00187088	hypothetical protein
20.m03940	1.65117	0.00847105	hypothetical protein
583.m05738	1.65088	0.002646	hypothetical protein
20.m05976	1.65071	0.000327144	hypothetical protein
20.m03895	1.6507	0.0112358	cleft lip and palate associated transmembrane protein 1, putative
44.m06355	1.64966	0.00811686	hypothetical protein
44.m02644	1.64829	0.00481395	hypothetical protein
55.m10344	1.64603	0.0265984	conserved hypothetical protein
541.m01166	1.64298	0.0159264	hypothetical protein
80.m02299	1.64267	0.0187741	starch binding domain-containing protein
44.m02814	1.63975	0.00424933	hypothetical protein
80.m00088	1.63888	0.000420902	cytosol aminopeptidase
50.m03131	1.63873	0.00761808	hypothetical protein
80.m05394	1.63838	0.000705592	hypothetical protein
52.m00009	1.63765	0.0427395	valyl-tRNA synthetase, putative
46.m01607	1.63748	0.00142615	aminotransferase, putative
46.m01734	1.63683	0.00700565	hypothetical protein
541.m00131	1.6353	0.00342563	hypothetical protein
59.m03479	1.63389	0.00578888	protease-related
551.m00439	1.63351	0.0179942	Gpi16 subunit, GPI transamidase domain-containing protein
46.m01671	1.63274	0.000117862	apoptosis-regulating basic protein, putative
74.m00455	1.6298	0.00202068	hypothetical protein
583.m00591	1.62888	5.10533e-05	fas apoptotic inhibitory molecule-related / lifeguard protein-related
49.m07245	1.62873	0.000147069	hypothetical protein
25.m02939	1.62824	0.00924694	hypothetical protein
583.m05509	1.62661	0.0148087	hypothetical protein
57.m01720	1.6238	0.0137032	hypothetical protein
69.m00143	1.62355	0.000447203	hypothetical protein
49.m03281	1.62347	0.000993664	proteasome subunit alpha type 6, putative
583.m00592	1.62323	0.00216531	succinyl-CoA ligase, putative
55.m10300	1.62227	0.0418149	conserved hypothetical protein
25.m01903	1.62096	5.36172e-05	protein kinase domain-containing protein
65.m01096	1.62005	0.0174475	sec23/Sec24 domain-containing protein
69.m00135	1.61995	0.000701205	hypothetical protein
42.m03322	1.61896	0.00157469	hypothetical protein
20.m08222	1.61828	0.0010795	conserved hypothetical protein
44.m02639	1.618	0.00281583	hypothetical protein
55.m00218	1.6147	0.0313746	PPR repeat-containing protein
80.m00095	1.61328	0.0420726	leucyl-tRNA synthetase, putative
49.m03213	1.61195	0.000115068	malaria antigen, putative
645.m00312	1.61173	0.0088957	recA-like protein
583.m05739	1.61079	0.000189417	geranylgeranyl transferase type II beta subunit, putative
583.m11399	1.6097	0.000407603	conserved hypothetical protein
583.m05296	1.60954	0.0280094	conserved hypothetical protein
55.m04954	1.60713	0.00811329	hypothetical protein
59.m07797	1.60637	0.00237827	conserved hypothetical protein
49.m00004	1.60602	0.000112355	adenosine transporter
31.m00931	1.60274	0.0045136	conserved hypothetical protein
542.m00001	1.60175	0.00239401	proteasome subunit beta type 7, putative
50.m03244	1.60086	0.0454459	SPX domain-containing protein
59.m03713	1.60061	0.0243099	10 kDa chaperonin, putative
583.m05406	1.59889	0.000867049	cation channel family domain-containing protein
42.m03409	1.59886	0.0153116	hypothetical protein
44.m02728	1.59848	0.00298806	brix domain-containing protein
145.m00586	1.59786	0.00772257	hypothetical protein
541.m01160	1.59678	0.00197284	corA-like Mg2+ transporter domain-containing protein
50.m03306	1.59646	0.00482288	TPR domain-containing protein
72.m00386	1.59522	0.00102957	ubiquitin conjugation factor-related
76.m01640	1.59448	0.000964712	prolyl endopeptidase, putative
55.m00114	1.59315	0.0434971	cystathionine beta-synthase, putative
76.m03421	1.59307	0.00875771	hypothetical protein
59.m06073	1.59253	0.0236927	hypothetical protein
74.m00460	1.59102	0.000538343	hypothetical protein
59.m03640	1.59044	0.000997575	hypothetical protein
50.m00040	1.59018	0.00768725	syntaxin, putative
42.m00093	1.58969	0.0347668	hypothetical protein
641.m03147	1.5891	0.0228144	hypothetical protein
55.m04775	1.58798	0.0435616	adenylate kinase, putative
59.m03724	1.58723	0.0493176	O-sialoglycoprotein endopeptidase-related
49.m07198	1.58605	0.00148289	hypothetical protein
80.m02225	1.58462	0.00506288	adipocyte plasma membrane-associated protein-related
31.m00901	1.58448	0.000186293	conserved hypothetical protein
57.m03110	1.58317	0.00117776	hypothetical protein
59.m00075	1.58197	0.00175417	RNA binding motif-containing protein
44.m02710	1.57992	0.00769817	hypothetical protein
49.m00047	1.57972	0.0104878	TCP-1/cpn60 family chaperonin, putative
583.m05634	1.57937	0.0308031	conserved hypothetical protein
20.m03880	1.57935	0.00434924	hypothetical protein
49.m00015	1.5792	0.000391022	bystin, putative
49.m03226	1.57903	0.0367697	coatomer alpha subunit, putative / COPA protein, putative
145.m00332	1.57692	0.0182115	hypothetical protein
42.m03603	1.57687	0.0188214	hypothetical protein
65.m01122	1.57655	0.00043761	hypothetical protein
641.m01520	1.5765	0.000139368	transmembrane protein, putative
55.m04830	1.57624	0.00366167	hypothetical protein
44.m02557	1.57618	0.0150468	thiF family domain-containing protein
20.m05880	1.575	0.000717387	protein phosphatase 2C, putative
80.m02333	1.57474	0.00694694	hypothetical protein
65.m00028	1.57451	0.0204336	26S proteasome AAA-ATPase subunit RPT1, putative
50.m03132	1.57446	0.000198382	hypothetical protein
80.m02355	1.57394	0.00300418	serine/threonine-protein kinase, putative / NimA-related protein kinase, putative
50.m07095	1.57347	0.010095	conserved hypothetical protein
42.m03585	1.57324	0.0458281	hypothetical protein
645.m00680	1.57274	0.0353609	hypothetical protein
52.m01583	1.57199	0.0101495	hypothetical protein
46.m01722	1.5709	0.00194729	transmembrane domain-containing protein
27.m00828	1.5705	0.0230742	hypothetical protein
49.m07217	1.5686	0.0349192	hypothetical protein
55.m00013	1.56851	0.0183594	histone H3
39.m00334	1.568	0.00218146	L-type amino acid transporter-related
644.m00075	1.56628	0.00171557	hypothetical protein
80.m00089	1.56515	0.00218722	patched transmembrane domain-containing protein
57.m01839	1.56499	0.0134016	SRS domain-containing surface antigen, putative
83.m02148	1.56419	0.00846845	eukaryotic translation initiation factor 3 subunit 8, putative
27.m01232	1.56275	0.019062	hypothetical protein
41.m00031	1.56116	0.00845459	SPFH domain / Band 7 family domain-containing protein
42.m00059	1.56074	0.000179689	histone H3 variant, putative
583.m00002	1.55978	0.00181206	peroxidoxin 2
44.m04679	1.55938	0.0159209	hypothetical protein
86.m00653	1.55922	0.0222021	hypothetical protein
49.m05705	1.55868	0.0366364	plectin, putative
52.m01567	1.5584	0.000508688	cell wall protein-related
59.m03515	1.55769	0.00797597	clathrin-associated adaptor complex small chan, putative
542.m00226	1.55705	8.47858e-05	conserved hypothetical protein
80.m02122	1.55694	0.0012455	hypothetical protein
55.m04968	1.55472	0.0023612	calmodulin, putative
583.m05497	1.55467	0.00448825	mitogen-activated protein kinase, putative
50.m07137	1.55462	0.0293773	conserved hypothetical protein
52.m01602	1.5546	0.000153645	DnaJ domain-containing protein
59.m07777	1.55419	0.0132319	hypothetical protein
25.m01777	1.55413	0.0320328	DnaJ domain-containing protein
641.m01485	1.5541	0.00435594	hypothetical protein
59.m03405	1.55282	1.68524e-05	hypothetical protein
50.m03074	1.55189	0.00693326	hypothetical protein
46.m01650	1.55142	0.00193603	hypothetical protein
65.m01140	1.55124	0.00738572	dolichol-phosphate mannosyltransferase, putative
64.m00352	1.55002	0.00581269	hypothetical protein
38.m00008	1.5482	0.0289124	F-actin capping protein beta subunit, putative
25.m00185	1.54702	0.00111233	double-stranded DNA-binding domain-containing protein
44.m02627	1.54501	0.00980344	hypothetical protein
583.m05272	1.54466	0.0483072	tRNA methyl transferase, putative
583.m05342	1.54454	0.0223047	conserved hypothetical protein
55.m00159	1.54402	0.0336159	nucleolar GTP-binding protein NGB, putative
35.m00029	1.54204	0.000188673	conserved hypothetical protein
49.m00062	1.54194	0.000325783	coatomer epsilon subunit, putative
35.m00930	1.54167	0.0257715	hypothetical protein
72.m00405	1.53891	5.0408e-05	signal peptidase, putative
76.m00005	1.53887	0.00191693	proteasome subunit alpha type 2, putative
55.m05020	1.53824	7.54386e-05	trypsin, putative
50.m05646	1.53751	0.0111126	ras-related protein RAB7, putative
541.m01195	1.53729	8.66758e-05	calcyclin binding protein-related
72.m00685	1.53629	0.00140562	hypothetical protein
72.m00396	1.5361	0.00422369	signal recognition particle protein, putative
42.m00041	1.53605	3.94791e-05	hypothetical protein
33.m01341	1.53495	0.000142811	adapter-related protein complex, putative
37.m00775	1.53405	0.0158069	proteasome PCI domain-containing protein
52.m02720	1.5337	0.0018326	tim10/DDP zinc finger domain-containing protein
20.m03931	1.53313	0.000327035	lysyl-tRNA synthetase, putative
57.m01879	1.53217	0.00686392	dynamin-like protein, putative
583.m00625	1.52809	0.0172091	conserved hypothetical protein
69.m00201	1.52793	0.000589139	hypothetical protein
20.m00379	1.52697	1.28939e-05	paired amphipathic helix protein sin3b-related
20.m03760	1.52661	0.0168526	serine/threonine-protein kinase, putative
37.m00009	1.52581	0.0403826	hypothetical protein
52.m01549	1.52335	0.0132464	vacuolar protein sorting 29, putative
76.m01677	1.52252	0.000851035	heat shock protein-related
50.m00095	1.52218	0.0106522	apolipoprotein A-I binding protein, putative
20.m03956	1.522	0.0347445	metacaspase-related
55.m00146	1.52069	0.00590034	26S protease regulatory subunit 8, putative
50.m00005	1.52067	0.000267009	fructose-1,6-bisphosphatase, putative
33.m01304	1.5191	0.000647242	nudix hydrolase domain-containing, bis(5'-nucleosyl)-tetraphosphatase, putative
46.m01611	1.5186	0.000516153	phenylalanyl tRNA synthetase isoform, putative
641.m01532	1.51757	0.0432281	kinesin motor domain-containing protein
50.m00008	1.51665	0.00940315	cysteine proteinase, putative
38.m01040	1.51644	0.00434577	hypothetical protein
52.m01670	1.5161	0.00130751	hypothetical protein
42.m03365	1.51587	0.0174824	IQ calmodulin-binding motif domain-containing protein
42.m00034	1.51485	0.00236931	adhesion regulating molecule, putative
44.m00030	1.51426	0.000903498	conserved hypothetical protein
33.m01280	1.51426	0.00500978	GTP binding protein, putative
80.m02258	1.51411	0.0174643	hypothetical protein
25.m02942	1.51338	0.0193068	hypothetical protein
25.m01842	1.51337	0.0143079	protein kinase, putative
42.m07413	1.5129	0.0261075	hypothetical protein
31.m01818	1.51184	0.0125269	hypothetical protein
55.m00216	1.51163	0.0351736	hypothetical protein
583.m05709	1.51095	5.62184e-05	myosin regulatory light chain, putative
31.m00863	1.5106	0.0115242	ADP-ribosylation factor domain-containing protein
46.m01679	1.51008	0.0251625	hypothetical protein
20.m03673	1.50971	4.10138e-05	hypothetical protein
59.m00030	1.5081	0.000153903	26S proteasome non-ATPase subunit, putative
42.m00072	1.50739	0.00562611	syntaxin, putative
52.m03468	1.50711	0.00503911	hypothetical protein
50.m00004	1.50704	0.00776777	proliferating cell nuclear antigen 1, putative
55.m00278	1.50661	0.000417133	conserved hypothetical protein
57.m01712	1.50555	0.0213912	tubulin-specific chaperone-related
20.m03977	1.50448	0.0125767	conserved hypothetical protein
72.m00385	1.50416	0.00116298	calmodulin, putative
48.m00095	1.50278	0.000411424	hypothetical protein
42.m00027	1.50176	0.0278578	26S proteasome non-ATPase regulatory subunit 4, putative
65.m00007	1.50118	0.00707096	protein phosphatase 2C, putative
80.m02239	1.50096	0.0234283	hypothetical protein
55.m04911	1.50081	0.00202786	hypothetical protein
50.m03248	1.50053	0.00206795	conserved hypothetical protein
76.m00019	1.50044	0.000288857	MA3 domain protein
49.m03215	1.4985	0.000438908	hypothetical protein
59.m00092	1.49824	0.00169298	conserved hypothetical protein
72.m00395	1.49727	0.00832069	histidyl-tRNA synthetase, putative
46.m01741	1.49656	0.00309998	hypothetical protein
41.m02949	1.49624	0.00178593	hypothetical protein
20.m05981	1.49596	0.012595	hypothetical protein
55.m08186	1.49582	0.000234566	conserved hypothetical protein
542.m00221	1.4942	0.0436614	phenylalanyl-tRNA synthetase beta chain, putative
42.m03303	1.49365	0.0058644	TPR domain-containing protein
25.m01838	1.49349	0.0350654	hypothetical protein
35.m00869	1.49338	0.0186	hypothetical protein
46.m01715	1.49281	0.0140618	hypothetical protein
76.m01673	1.49182	0.0226444	hypothetical protein
42.m00091	1.4916	0.00309235	hypothetical protein
55.m04783	1.49097	0.00193378	hypothetical protein
42.m03519	1.49019	0.0254418	hypothetical protein
69.m00140	1.48972	0.00058541	proliferation-associated protein 2G4, putative
583.m00697	1.48927	0.0233217	prefoldin subunit 5, putative
583.m05562	1.48876	0.00953756	60S ribosomal protein L7a, putative
42.m03523	1.48756	0.000922325	translin, putative
583.m00637	1.48745	0.00106499	fibrillarin, putative
583.m09194	1.48739	0.021444	protein tyrosine phosphatase-like domian-containing protein
86.m00378	1.48698	4.15559e-05	hypothetical protein
80.m02141	1.48689	0.0116367	UBX domain-containing protein
20.m03699	1.48565	0.00318422	conserved hypothetical protein
59.m00041	1.48534	0.0207671	conserved hypothetical protein
42.m00121	1.48533	0.0014337	tubulin gamma chain, putative
83.m01186	1.48438	0.00256915	hypothetical protein
583.m00645	1.4842	0.00229426	hypothetical protein
55.m04752	1.48417	0.00237551	hypothetical protein
44.m02813	1.4836	0.00240097	serine/threonine-protein kinase, putative
50.m00058	1.48352	0.000511772	thioredoxin, putative
20.m03896	1.48335	0.00302005	rhoptry protein, putative / protein kinase domain-containing protein
59.m03725	1.48235	0.0125592	conserved hypothetical protein
55.m04681	1.48221	0.00261718	hypothetical protein
583.m05609	1.48176	0.0348866	GTP-binding conserved hypothetical domain-containing protein
83.m01216	1.4811	0.00532137	molybdopterin biosynthesis MoeA protein, putative
86.m00377	1.47942	0.00504837	zinc finger (CCCH type) protein, putative
583.m05409	1.47815	0.0045682	hypothetical protein
59.m03514	1.47814	0.000378466	hypothetical protein
59.m07795	1.47743	0.00622561	integrase/recombinase XerD-related
80.m02268	1.47676	0.0137718	hypothetical protein
44.m00017	1.47599	0.0116267	26S protease regulatory subunit 6b, putative
46.m02889	1.47479	0.0243546	hypothetical protein
35.m00911	1.4742	0.0420179	hypothetical protein
80.m02304	1.47359	0.0336812	IQ calmodulin-binding motif domain-containing protein
162.m00325	1.47114	0.0370256	hypothetical protein
25.m00001	1.47032	0.00765257	phosphatidylinositol synthase, putative
65.m01158	1.47031	0.0298812	prenyltransferase and squalene oxidase repeat domain-containing protein
113.m00755	1.46781	0.00165774	duplicated carbonic anhydrase
46.m01720	1.46623	0.0116991	hypothetical protein
113.m00012	1.46582	0.019214	TCP-1/cpn60 family chaperonin, putative
583.m05753	1.46464	0.0064363	longevity-assurance (LAG1) domain-containing protein
80.m02298	1.46385	0.0412399	clathrin heavy chain, putative
583.m05622	1.46383	0.0428335	hypothetical protein
33.m01393	1.46226	0.0321855	hypothetical protein
59.m06080	1.46205	0.0122713	hypothetical protein
83.m02145	1.46166	0.00633978	rhoptry antigen, putative
641.m03155	1.46136	0.0180967	hypothetical protein
583.m05684	1.46104	0.0377054	hypothetical protein
20.m00349	1.46012	0.00233425	TCP-1/cpn60 family chaperonin, putative
44.m00026	1.45989	0.00845542	conserved hypothetical protein
80.m05023	1.45927	0.0481344	hypothetical protein
50.m03351	1.45917	0.00793352	sperm-associated antigen 4 protein-related
55.m08188	1.45894	0.00827515	hypothetical protein
27.m01477	1.45727	0.00143733	Sec61beta family protein
46.m01688	1.4572	0.0352597	autophagocytosis associated protein, putative
145.m00585	1.45706	0.00677598	archease-related
33.m01336	1.45592	0.0379716	small GTP-binding protein sar1, putative
50.m00093	1.45521	9.4901e-06	C2 domain-containing protein
25.m01796	1.45512	0.00707248	aldo/keto reductase family oxidoreductase, putative
80.m00004	1.45448	0.00146469	mu1 adaptin, putative
39.m00372	1.45441	0.0216239	protein phosphatase 2C, putative
49.m07238	1.45423	0.00219158	conserved hypothetical protein
52.m01657	1.45393	0.00474372	WD-40 repeat-containing protein
641.m01561	1.45348	0.00851715	bradyzoite surface antigen BSR4, putative
41.m00036	1.45337	0.00313952	tubulin beta chain, putative
50.m03098	1.45331	0.0285406	SAG2 related antigen SAG2C-related
26.m00370	1.45274	0.00555683	hypothetical protein
551.m00224	1.45269	0.041391	ectonucleoside triphosphate diphosphohydrolase, putative
42.m03522	1.45258	0.00417749	hypothetical protein
50.m03093	1.45232	0.0165486	hypothetical protein
645.m00685	1.44919	0.033192	hypothetical protein
50.m00057	1.44912	0.000187582	hypothetical protein
74.m00432	1.44767	0.00198407	ribonuclease HI large subunit, putative
83.m01283	1.44747	0.0407268	armadillo/beta-catenin-like repeat-containing protein
583.m05403	1.44606	0.00916844	hypothetical protein
42.m00081	1.44572	0.000179098	NAD-dependent deacetylase, putative
50.m05650	1.4445	0.0376384	hypothetical protein
145.m00353	1.4437	2.04728e-05	endoplasmic reticulum oxidoreductin, putative
57.m01699	1.44301	0.0415904	oxysterol-binding protein, putative
42.m00064	1.44282	0.0033456	50s ribosomal protein L13, putative
542.m00218	1.44242	0.0126018	hypothetical protein
583.m05666	1.44102	0.000112808	MYG1 protein-related
49.m05671	1.44071	0.00204948	hypothetical protein
42.m07404	1.44005	0.00202046	conserved hypothetical protein
49.m03400	1.43982	0.000851283	hypothetical protein
44.m02555	1.43919	0.0290221	machado-joseph disease protein, putative
611.m00038	1.43896	0.0238769	eukaryotic translation initiation factor 3 subunit 7, putative
50.m03210	1.4388	0.0147642	hypothetical protein
42.m00061	1.43764	0.0212897	conserved hypothetical protein
541.m00146	1.43717	0.0229867	hypothetical protein
55.m04644	1.43651	0.0255229	protein kinase, putative
49.m03399	1.43594	0.0226574	hypothetical protein
50.m03254	1.43444	0.000838246	conserved hypothetical protein
76.m01695	1.43417	0.00178357	conserved hypothetical protein
72.m00380	1.43381	0.000694891	3',5'-cyclic phosphodiesterase, putative
42.m03590	1.4329	0.0223931	hypothetical protein
44.m02735	1.43278	0.00570991	patatin-like phospholipase domain-containing protein
20.m03910	1.42913	0.00386359	TCP-1/cpn60 family chaperonin, putative
64.m00324	1.42904	0.0246448	ubiquitin-transferase domain-containing protein
50.m03315	1.42864	0.0211166	hypothetical protein
641.m01549	1.42746	0.00713323	hypothetical protein
42.m03586	1.427	0.0382911	mitochondrial import inner membrane translocase, putative
80.m02206	1.42613	0.017029	methionyl-tRNA synthetase, putative
20.m03933	1.42609	0.012887	hypothetical protein
20.m05877	1.42572	0.0258888	hypothetical protein
55.m00100	1.42497	0.0161055	zinc finger (C3HC4 RING finger) protein, putative
57.m00027	1.42479	0.00211278	thioredoxin, putative
641.m03167	1.4239	0.0149559	conserved hypothetical protein
583.m05407	1.42272	0.0425141	ubiquitin carboxyl-terminal hydrolase, putative
44.m02636	1.42151	0.00567582	protein kinase, putative
55.m08198	1.41945	0.00160285	porin, putative
49.m03397	1.4189	0.00235906	2-oxoglutarate dehydrogenase, putative
59.m03526	1.41826	0.0132438	deoxyribose-phosphate aldolase, putative
63.m00152	1.41802	0.0487458	hypothetical protein
113.m01277	1.41646	0.0081732	hypothetical protein
55.m00092	1.416	0.0024838	hypothetical protein
42.m00020	1.4148	0.000617272	proteasome component PRE3 precursor, putative / proteasome subunit beta type 6 precursor, putative
583.m05378	1.41439	0.000125542	glycogen phosphorylase, putative
42.m07415	1.41427	0.000124064	conserved hypothetical protein
583.m09169	1.41426	0.0223097	small nuclear ribonucleoprotein E/G, putative
46.m01763	1.41392	0.0161725	armadillo/beta-catenin-like repeat-containing protein
49.m05685	1.41325	0.00635086	hypothetical protein
50.m03331	1.41269	0.00106057	hypothetical protein
55.m00277	1.41216	0.000161626	conserved hypothetical protein
59.m03406	1.41186	0.00318049	hypothetical protein
41.m01362	1.41151	0.0363976	hypothetical protein
44.m04667	1.411	0.0178524	CW-type zinc finger domain-containing protein
49.m03223	1.41006	0.00800542	myosin light chain kinase, putative
42.m00122	1.40935	0.0143453	glycogen debranching enzyme, putative
86.m00357	1.40917	0.000863929	tubulin-specific chaperone A, putative
59.m00071	1.40889	0.00372056	nucleolar protein family A, putative
113.m00756	1.40867	0.00480896	pyridoxal kinase-related
44.m02700	1.40763	0.0117505	peptidase family T4, putative
583.m05741	1.4068	0.0420143	DEAD/DEAH box helicase, putative
80.m05036	1.40667	0.0410594	conserved hypothetical protein
55.m04635	1.40564	0.00726895	pyridine nucleotide-disulphide oxidoreductase, putative
42.m00065	1.40486	0.000903211	ATP synthase, putative
20.m00328	1.40457	0.0132686	hypothetical protein
57.m01772	1.40392	0.000532059	hypothetical protein
583.m00010	1.40387	0.0436727	Ca2+-ATPase
25.m01891	1.40336	0.00017638	hypothetical protein
583.m05596	1.40307	0.00844141	cytochrome c heme lyase, putative
42.m03584	1.40274	0.00487004	hypothetical protein
52.m01644	1.40268	0.045346	hypothetical protein
52.m02717	1.40259	0.00216197	hypothetical protein
27.m00114	1.40258	0.0139992	ubiquitin carboxyl-terminal hydrolase, putative
83.m01268	1.40027	0.0359717	hypothetical protein
31.m00939	1.39959	0.0047097	hypothetical protein
59.m00029	1.39837	0.0055337	hypothetical protein
52.m01564	1.39744	0.0297159	hypothetical protein
541.m01146	1.39574	0.00108893	guanylate binding protein, putative
641.m01560	1.39515	0.0292749	SAG1-related sequence 6 (SRS6), putative
42.m00010	1.39389	0.00230069	conserved hypothetical protein
145.m00325	1.39251	0.00554619	TPR domain-containing protein
76.m01597	1.39233	0.0141287	hypothetical protein
52.m01632	1.39061	0.00641646	zinc transporter ZIP domain-containing protein
57.m01816	1.38987	0.00252785	3-demethylubiquinone-9 3-methyltransferase, putative
80.m00087	1.38939	0.00458828	succinyl-CoA ligase alpha subunit, putative
83.m01293	1.38929	0.00350772	hypothetical protein
583.m05276	1.38832	0.0391789	hypothetical protein
583.m05397	1.38802	0.00195302	hypothetical protein
583.m00622	1.38796	5.54555e-05	conserved hypothetical protein
50.m00049	1.38786	0.028021	actin, putative
42.m03475	1.38777	0.0382331	hypothetical protein
583.m05267	1.38741	0.00640683	sodium:solute symporter family domain-containing protein
541.m01198	1.3872	0.00958083	defender against cell death 1 (DAD-1), putative
76.m01589	1.38696	0.0359219	hypothetical protein
542.m00333	1.38663	0.037142	hypothetical protein
583.m09217	1.38385	0.00727862	hypothetical protein
583.m09158	1.3837	0.00715085	hypothetical protein
50.m00026	1.38211	0.000320827	cytochrome C1, putative
57.m01773	1.38166	0.00197599	conserved hypothetical protein
42.m03611	1.38117	0.00213218	eukaryotic translation initiation factor 3 subunit 5, putative
583.m00022	1.37942	0.00399701	tubulin alpha chain
50.m03110	1.37806	0.0383352	CRAL/TRIO domain-containing protein
55.m08203	1.37703	0.00491417	hypothetical protein
25.m00005	1.37614	0.00603224	50S ribosomal protein L28, putative
49.m03388	1.37604	0.0241987	hypothetical protein
57.m01857	1.37522	0.00128593	DnaJ domain-containing protein
74.m00439	1.37439	0.0412184	hydroxyacylglutathione hydrolase, putative
33.m01334	1.37409	0.0381514	hypothetical protein
49.m03315	1.37381	0.00194839	hypothetical protein
33.m02668	1.37229	0.000687553	intracellular protease, putative
57.m01682	1.37204	0.0011478	ADP-ribosylation factor
80.m02343	1.3715	0.00188477	ROP8, putative
44.m02760	1.37093	0.0317578	serine/threonine-protein kinase, putative / mitogen-activated protein kinase, putative
20.m03941	1.37073	0.000178526	cytochrome c oxidase assembly protein (heme A: farnesyltransferase), putative
41.m01295	1.37024	0.0405814	actin-related
86.m00396	1.36923	0.0168631	ubiquitin-conjugating enzyme E2, putative
26.m00246	1.36853	0.00405439	high mobility group protein
55.m04666	1.36853	0.0280433	solute carrier family 13, putative
50.m03283	1.36837	3.82057e-05	ctr copper transporter domain-containing protein
55.m04838	1.36806	0.00276985	orotate phosphoribosyltransferase, putative
27.m00832	1.36803	0.0292782	arginyl-tRNA synthetase, putative
25.m01780	1.36783	0.00165174	mitogen-activated protein kinase, putative
77.m00051	1.36632	0.0390261	hypothetical protein
129.m00260	1.36632	0.0167594	transport protein particle (TRAPP) component, Bet3, putative
49.m03440	1.36623	0.0136363	MIZ zinc finger protein, putative
583.m05487	1.36566	0.0165451	hypothetical protein
42.m03570	1.36561	0.0439047	lytB domain-containing protein
547.m00089	1.36498	0.000347181	uracil-DNA glycosylase, putative
33.m01306	1.36488	0.00662573	hypothetical protein
49.m00035	1.36472	0.0362363	hypothetical protein
42.m00088	1.3645	0.00395365	glutaredoxin, putative
52.m02681	1.36431	0.00242383	hypothetical protein
25.m02935	1.36347	0.00727559	elongation factor TS, putative
86.m00898	1.36121	0.0187713	conserved hypothetical protein
20.m05904	1.361	0.0382865	hypothetical protein
20.m03728	1.36049	0.00832534	NLI interacting factor-like phosphatase domain-containing protein
49.m03275	1.36038	0.0349417	protein kinase domain-containing protein
27.m00850	1.36035	0.019577	hypothetical protein
33.m01319	1.36015	0.00397522	hypothetical protein
76.m01587	1.35881	0.00767015	hypothetical protein
59.m03460	1.35865	0.00663449	hypothetical protein
645.m00320	1.35829	0.0119185	WOS2 protein (p21), putative / telomerase-binding protein p23, putative
59.m03723	1.35775	9.42766e-05	thiF family domain-containing protein
583.m09205	1.35765	0.000766226	hypothetical protein
44.m00038	1.35688	0.00971768	thiF family domain-containing protein
641.m00189	1.35643	0.0484927	ABC transporter, putative
59.m03413	1.35636	0.000293107	hypothetical protein
44.m02633	1.35587	0.0114248	conserved hypothetical protein
39.m00362	1.35261	0.0470922	hypothetical protein
55.m04891	1.35246	0.0068872	ubiquitin thiolesterase protein, putative
59.m03591	1.35216	0.0472755	hypothetical protein
55.m08219	1.35142	0.000467525	hypothetical protein
55.m04597	1.35092	0.00169208	hypothetical protein
83.m01220	1.34993	0.048317	hypothetical protein
55.m00081	1.34954	0.0176653	proteasome subunit alpha type 7, putative
50.m03346	1.34718	0.000404262	tetrapyrrole (corrin/porphyrin) methylase domain-containing protein
59.m03634	1.34671	0.0293882	myo-inositol transprter, putative
49.m03099	1.346	0.03522	conserved hypothetical protein
42.m00057	1.34541	0.00303514	hypothetical protein
39.m00370	1.34487	0.0425145	hypothetical protein
59.m00006	1.34479	0.000509092	cyst matrix protein, putative
80.m02297	1.34458	0.0133312	endomembrane domain-containing protein
42.m03606	1.34382	0.00601364	phosphatidylcholine transfer protein-related
25.m01837	1.34369	0.00557682	HECT-domain (ubiquitin-transferase) containing protein
37.m00748	1.34308	0.0186347	hypothetical protein
42.m07405	1.34296	0.0463087	hypothetical protein
20.m03984	1.34229	0.0100739	hypothetical protein
46.m01740	1.34228	0.00411644	hypothetical protein
641.m01494	1.34161	0.00427473	DNA/pantothenate metabolism flavoprotein domain-containing protein
49.m00052	1.34137	0.0212229	nucleosome assembly protein-related
44.m02591	1.34096	0.00410564	protein translocation complex, SEC61 gamma subunit, putative
57.m00003	1.34085	0.00395428	tubulin beta chain
55.m05000	1.33955	0.0112929	hypothetical protein
31.m00878	1.33767	0.00853203	small nuclear ribonucleoprotein F (snRNP-F), putative
145.m00322	1.33751	0.0113402	cysteinyl-tRNA synthetase, putative
65.m00030	1.33749	0.0420252	hypothetical protein
64.m00001	1.33641	0.0195813	p97 protein
42.m03498	1.33623	0.000388374	reticulon domain-containing protein
35.m00023	1.33518	0.00606388	conserved hypothetical protein
113.m00802	1.3342	0.00123602	dense-granule antigen DG32, putative
52.m02715	1.33389	0.00650035	ankyrin repeat-containing protein
44.m00004	1.33326	0.0184482	membrane skeletal protein IMC1
42.m03386	1.33253	0.0144874	hypothetical protein
52.m01535	1.33167	0.00931283	ribosomal protein L1p-related
55.m05067	1.33116	0.0162846	10 kDa heat shock protein, mitochondrial, putative
59.m03414	1.32976	0.0211725	citrate synthase, putative
583.m05341	1.32706	0.0351729	hypothetical protein
46.m03689	1.32701	0.014656	hypothetical protein
20.m03708	1.32567	0.00206283	conserved hypothetical protein
20.m00331	1.32566	0.00371191	hypothetical protein
20.m03971	1.32228	0.00872985	hypothetical protein
76.m01574	1.32196	0.0144111	hypothetical protein
25.m00219	1.32166	0.0425473	pyridine nucleotide-disulphide oxidoreductase domain-containing protein
20.m03682	1.31989	0.00252206	hypothetical protein
583.m09134	1.3194	0.0172052	hypothetical protein
57.m03995	1.31929	0.0210345	conserved hypothetical protein
42.m00046	1.31879	0.000196876	hypothetical protein
69.m00139	1.31662	0.0037425	conserved hypothetical protein
46.m03658	1.31478	0.0170439	conserved hypothetical protein
41.m00014	1.31468	0.00376369	coatomer delta subunit, putative
44.m00031	1.31331	0.00185172	membrane skeletal protein IMC1, putative
80.m02177	1.31281	0.0275703	hypothetical protein
83.m01229	1.31272	0.0116663	hypothetical protein
33.m01315	1.31262	0.0141364	hypothetical protein
50.m03151	1.31232	0.0353627	hypothetical protein
69.m00142	1.31226	0.020504	glutaredoxin-related
20.m03946	1.31151	0.0232198	peptidyl-tRNA hydrolase domain-containing protein
583.m09133	1.31131	0.0250978	hypothetical protein
59.m03444	1.31072	0.00052703	hypothetical protein
55.m08224	1.31002	0.00104023	phosphorylase B kinase gamma catalytic chain, putative
59.m00009	1.30985	0.0268389	ribosomal protein S17p-related
50.m00009	1.3098	0.00533904	ADP/ATP carrier, putative
49.m00005	1.30953	0.0112464	beta adaptin protein, putative
38.m01096	1.3072	0.0206243	eukaryotic porin domain-containing protein
49.m03372	1.30713	0.0255274	long-chain fatty acid CoA ligase, putative
50.m05668	1.30683	0.022499	hypothetical protein
25.m02954	1.30669	0.029762	gamma-tubulin complex component 4-related
59.m03655	1.30374	0.0086461	TCP-1/cpn60 family chaperonin, putative
55.m04617	1.3022	0.0232476	hypothetical protein
86.m00373	1.30214	0.000492431	hypothetical protein
44.m04690	1.30196	0.0179768	transaldolase, putative
541.m02067	1.29994	0.0234816	hypothetical protein
55.m04843	1.29959	0.00261811	hypothetical protein
55.m00144	1.29922	0.000619263	hypothetical protein
72.m00383	1.29922	0.0343454	hypothetical protein
20.m03755	1.29879	0.00100808	hypothetical protein
76.m01626	1.29868	0.0227228	SRS domain-containing surface antigen, putative
55.m04665	1.29836	0.00374093	glycyl-tRNA synthetase, putative
42.m00087	1.29827	0.00784742	hypothetical protein
59.m03693	1.29611	0.0100732	hypothetical protein
83.m01196	1.29592	0.0093122	endonuclease/exonuclease/phosphatase domain-containing protein
641.m01588	1.29478	0.00703593	glycine-rich protein 2, putative
113.m00804	1.29206	0.0424446	hypothetical protein
27.m00091	1.29164	0.0132327	hypothetical protein
20.m05984	1.28758	0.0194049	hypothetical protein
35.m00860	1.28704	0.00027996	hypothetical protein
41.m00021	1.28693	0.00365512	articulin 4
541.m01151	1.28662	0.0400741	calmodulin, putative
41.m01270	1.28639	0.00897046	hypothetical protein
83.m00015	1.28615	0.00186613	der1-like family domain-containing protein
50.m03208	1.28606	0.0488796	hypothetical protein
44.m00001	1.28591	0.0371211	membrane-associated calcum-binding protein, related
42.m00062	1.28539	7.73316e-05	ADP-ribosylation factor GTPase-activating protein, putative
20.m05985	1.28534	0.0134024	RNA-binding protein, putative
25.m01827	1.28532	0.00152735	mitochondrial carrier domain-containing protein
76.m00008	1.28353	0.00410864	synaptic glycoprotein sc2 homolog, putative
641.m00185	1.2833	0.000527364	G1 to S phase transition protein, putative
551.m00238	1.28285	0.0237307	rhoptry antigen, putative
55.m05099	1.28188	0.032804	conserved hypothetical protein
55.m04677	1.28186	0.00758193	glucose transporter-related
42.m00058	1.28151	0.000432909	bis(5'-nucleosyl)-tetraphosphatase, putative
55.m05070	1.28103	0.020775	trichohyalin, putative
541.m01140	1.28032	0.0304148	glycerol-3-phosphate dehydrogenase-related
55.m04929	1.27992	0.0104884	ribosomal protein S8p-related
59.m00055	1.27944	0.0297894	eukaryotic translation initiation factor 3 subunit 6 interacting protein, putative
20.m00003	1.27837	0.00640718	hypothetical protein
42.m03309	1.27826	0.00868354	conserved hypothetical protein
44.m00037	1.27799	0.00962996	serine-threonine phosophatase 2C
55.m04663	1.27709	0.00371426	vacuolar ATP synthase, putative
35.m00005	1.27537	0.000152013	hypothetical protein
25.m01896	1.27524	0.00883621	glutamic acid-rcih protein, putative
50.m03247	1.27418	0.00100542	aspartate aminotransferase, putative
33.m01398	1.27361	0.0188487	rhoptry antigen, putative
38.m01067	1.27299	0.0107713	alanyl-tRNA synthetase, putative
80.m02324	1.27209	0.0365908	hypothetical protein
46.m00016	1.27186	0.0339926	translation initiation factor 2 beta, putative
57.m03130	1.2706	0.0300436	hypothetical protein
35.m00871	1.27038	0.0106121	hypothetical protein
65.m01972	1.26967	0.0363548	ubiquitin-conjugating enzyme E2, putative
583.m05477	1.26887	0.0294307	AAA family ATPase, putative
583.m00682	1.26653	0.0178497	conserved hypothetical protein
44.m02780	1.26647	0.0464208	GTP-binding protein, putative
38.m02377	1.26594	0.0261342	SET domain containing protein
583.m05515	1.26531	0.0170143	hypothetical protein
20.m00004	1.2645	0.0315362	mitochondrial processing peptidase alpha subunit, putative
80.m02338	1.26439	0.0337649	hypothetical protein
38.m01114	1.26371	0.0302291	hypothetical protein
8.m00176	1.26057	0.000533019	PAN domain-containing protein
39.m00332	1.26013	0.0199447	ribosomal protein L16, putative
59.m00072	1.25985	0.000796984	hypothetical protein
49.m00027	1.25899	0.0498345	D-3-phosphoglycerate dehydrogenase, putative
641.m00003	1.25814	0.0249507	rar1
57.m01862	1.25768	0.00711604	N2,N2-dimethylguanosine tRNA methyltransferase, putative
44.m02808	1.25693	0.00522226	hypothetical protein
33.m01271	1.25643	0.0114898	hypothetical protein
27.m00846	1.25574	0.000220732	hypothetical protein
49.m00056	1.25566	0.00798437	hypothetical protein
46.m03702	1.25532	0.0435236	Signal recognition particle 9 kDa protein, putative
65.m01155	1.25462	0.00109243	hypothetical protein
55.m00157	1.25428	0.0331897	hypothetical protein
52.m01543	1.25353	0.0126152	rhoptry protein-related / protein kinase-related
59.m07745	1.25226	0.000996815	conserved hypothetical protein
20.m03932	1.25021	0.00811226	adenosine deaminase-related
50.m03253	1.24979	0.00191156	hypothetical protein
39.m00350	1.2481	0.00155246	pfs77-related
42.m00106	1.24743	0.0268734	conserved hypothetical protein
50.m03320	1.24684	0.0494617	hypothetical protein
50.m03081	1.24532	0.0397339	hypothetical protein
50.m03207	1.24514	0.0337923	hypothetical protein
20.m03763	1.24501	0.00308602	hypothetical protein
76.m01665	1.24484	6.59715e-05	lysophospholipase, putative
33.m01321	1.24038	0.0256915	conserved hypothetical protein
641.m01541	1.23955	0.0134527	hypothetical protein
52.m01551	1.23861	0.0496022	hypothetical protein
547.m00082	1.23811	0.0454037	glycerol-3-phosphate dehydrogenase, putative
641.m01538	1.2378	0.0129681	ubiquitin-conjugating enzyme E2, putative
583.m05454	1.23748	0.00277477	hypothetical protein
80.m02186	1.23731	0.0177259	conserved hypothetical protein
42.m00069	1.23703	0.0169874	elongation factor 1-beta, putative
59.m06066	1.23469	0.00908815	hypothetical protein
44.m04682	1.23413	0.00152343	conserved hypothetical protein
83.m01285	1.23413	0.0309799	hypothetical protein
44.m02663	1.23277	0.0429399	translational activator, putative
541.m01250	1.23216	0.0213862	hypothetical protein
50.m03330	1.23214	0.0165879	fas apoptotic inhibitory molecule-related / lifeguard protein-related
27.m00003	1.23173	0.0338655	protein disulfide isomerase, putative
46.m01692	1.23169	0.047267	mitochondrial processing peptidase beta subunit, putative
35.m00867	1.23096	0.0249546	hypothetical protein
23.m00237	1.23078	0.0162147	hypothetical protein
83.m01225	1.23016	0.0101205	hypothetical protein
41.m01332	1.2288	0.000355885	mog1 protein, putative
83.m01195	1.22843	0.00210863	NADP-specific glutamate dehydrogenase, putative
55.m05032	1.22804	0.00708901	hypothetical protein
55.m08184	1.22799	0.015015	hypothetical protein
69.m00137	1.22741	0.00171057	hypothetical protein
59.m06106	1.22731	0.0153834	bicoid-interacting (Bin3) domain-containing protein
46.m01684	1.2263	0.00398809	BT1 transmembrane domain-containing protein
35.m01595	1.2261	0.00716675	inner membrane complex protein (IMC3)
76.m01674	1.22607	0.021376	hypothetical protein
641.m01491	1.22464	0.00187134	3-methyl-2-oxobutanoate dehydrogenase [lipoamide] kinase, putative
50.m00052	1.22425	0.00205341	hypothetical protein
583.m05686	1.22386	0.0301652	hypothetical protein
49.m03277	1.22338	0.00377744	protein kinase domain-containing protein
50.m00042	1.22237	0.00447192	GTP-binding nuclear protein RAN/TC4, putative
76.m01664	1.2206	0.045537	hypothetical protein
42.m00084	1.21962	0.00763287	60S ribosomal protein L3, putative
80.m00006	1.21947	0.0296198	malate:quinone oxidoreductase, putative
39.m00330	1.21773	0.00335697	phosphoribosylpyrophosphate synthetase, putative
44.m02810	1.21691	0.0224604	RNA polymerase, putative
55.m05095	1.21293	0.00753216	hypothetical protein
20.m03929	1.21199	0.0108571	hypothetical protein
50.m00015	1.21074	0.0180721	lactoylglutathione lyase, putative
55.m00233	1.20995	0.0245969	casein kinase II alpha subunit, putative
80.m02318	1.20897	0.0304898	vacuolar ATP synthase 22 kDa proteolipid subunit, putative
80.m02134	1.20873	0.0189069	hypothetical protein
583.m00005	1.20838	0.0116754	cytochrome c oxidase subunit II, putative
20.m03809	1.20644	0.0368557	hypothetical protein
38.m01901	1.20644	0.0119223	hypothetical protein
38.m01061	1.20574	0.00745473	acid phosphatase, putative
55.m04695	1.20422	0.00203905	SCO1/SenC domain-containing protein
20.m03945	1.20332	0.0183785	ER lumen protein retaining receptor 1 (KDEL receptor 1), putative
49.m03434	1.20162	0.00878258	hypothetical protein
541.m01193	1.20032	0.00132607	hypothetical protein
41.m00006	1.2003	0.0303181	eukaryotic translation initiation factor 3 subunit 9, putative
641.m01597	1.19978	0.000511205	hypothetical protein
28.m00308	1.19959	0.0135078	vacuolar ATP synthase 16 kDa proteolipid subunit, putative
44.m02793	1.19936	0.0337764	UPF0101 protein CGI-137, putative
59.m03400	1.19821	0.00794816	hypothetical protein
541.m02068	1.1979	0.0343967	vesicle transport v-SNARE domain-containing protein
20.m03684	1.19595	0.0244863	hypothetical protein
49.m00063	1.19526	0.00659225	conserved hypothetical protein
583.m05533	1.19375	0.01903	conserved hypothetical protein
57.m00034	1.19368	0.00037132	conserved hypothetical protein
83.m01310	1.19298	0.0138957	hypothetical protein
42.m00048	1.19214	0.00414007	conserved hypothetical protein
44.m02692	1.19138	0.0234604	hypothetical protein
49.m05674	1.18919	0.0185734	hypothetical protein
55.m00015	1.18887	0.0184528	14-3-3 protein, putative
49.m00008	1.18845	0.0353905	ribosomal protein L23a, putative
44.m02736	1.18825	0.032943	hypothetical protein
23.m00156	1.18795	0.01126	hypothetical protein
50.m03340	1.18793	0.026101	conserved hypothetical protein
41.m02953	1.18753	0.0317473	hypothetical protein
20.m05892	1.18691	0.0424065	hypothetical protein
42.m00077	1.18377	0.047332	oligoendopeptidase F, putative
583.m00634	1.18252	0.0422946	hypothetical protein
46.m01667	1.1822	0.0457538	hypothetical protein
46.m01700	1.18208	0.011117	hypothetical protein
44.m04627	1.18168	0.00219965	conserved hypothetical protein
83.m01250	1.1802	0.00220054	hypothetical protein
59.m03648	1.1767	0.013172	hypothetical protein
49.m03336	1.1751	0.00988599	hypothetical protein
49.m00020	1.1745	0.00479397	ribose 5-phosphate isomerase, putative
42.m03444	1.17439	0.0285918	hypothetical protein
49.m00028	1.17419	0.00540294	2-oxoisovalerate dehydrogenase, putative
50.m03107	1.17308	0.0276636	hypothetical protein
59.m03416	1.17085	0.0195864	mitochondrial inner membrane protease, putative
57.m01777	1.17054	0.00677834	sterol-regulatory element binding protein (SREBP) site 2 protease, putative
49.m00051	1.16971	0.00874892	prohibitin, putative
20.m03647	1.16631	0.0428825	copper-transporting ATPase, putative
42.m05857	1.16584	0.0296357	hypothetical protein
49.m03288	1.16574	0.0186161	elongation of very long chain fatty acids 4 protein, putative
55.m04892	1.16573	0.0133785	hypothetical protein
33.m01305	1.1653	0.000159114	mitochondrial acidic protein mam33, mitochondrial precursor.
52.m01541	1.16251	0.0247387	glycerol uptake protein-related
20.m00390	1.16231	0.0440331	hypothetical protein
76.m00006	1.15988	0.00537025	zinc finger (C2H2 type) protein, putative
38.m01100	1.1574	0.0276519	glutathione reductase, putative
83.m01289	1.15483	0.0104033	hypothetical protein
59.m03682	1.15344	0.00839994	glutamine synthetase, putative
35.m00881	1.15164	0.0321352	hypothetical protein
46.m00023	1.14973	0.0450074	KH domain-containing protein
46.m01726	1.14959	0.0323942	conserved hypothetical protein
44.m02670	1.14723	0.0404699	hypothetical protein
59.m06121	1.14674	0.0163631	conserved hypothetical protein
57.m00001	1.14498	0.0102287	hexokinase
57.m01806	1.14481	0.0189542	tRNA synthetase, putative
641.m01513	1.1448	0.00465497	hypothetical protein
76.m01678	1.1438	0.033519	signal recognition particle 19 kDa protein, putative
55.m00165	1.14201	0.0433554	hypothetical protein
55.m00006	1.1418	0.00761815	endoplasmic reticulum retention receptor, putative
42.m03276	1.141	0.0354431	eukaryotic translation initiation factor 4E, putative
72.m00382	1.13747	0.000268646	ubiquitin-conjugating enzyme E2, putative
59.m00038	1.13709	0.0327371	hypothetical protein
583.m05399	1.13658	0.0228058	vacuolar ATP synthase subunit F, putative
50.m03428	1.13614	0.0343943	ribosomal protein L7/L12, putative
583.m00615	1.13405	0.0107321	thioredoxin reductase, putative
41.m01382	1.13349	0.00784069	ribosomal protein S18 domain protein
44.m04622	1.13324	0.0033582	hypothetical protein
641.m00179	1.13203	0.00895747	ribosome biogenesis regulatory protein homolog
583.m00009	1.13148	0.0009034	heat shock protein 70, putative
55.m04702	1.13019	0.00157473	L-type amino acid transporter-related
55.m04833	1.12028	0.0347249	endonuclease/exonuclease/phosphatase domain-containing protein
65.m01123	1.11853	0.00846584	mitochondrial ribosomal protein S14 precursor, putative
55.m00007	1.11283	0.0112871	pyruvate kinase, putative
80.m03988	1.11207	0.0318065	hypothetical protein
55.m04955	1.1118	0.042794	hypothetical protein
49.m03175	1.11139	0.000947932	hypothetical protein
42.m03595	1.10528	0.00466244	proteasome PCI domain-containing protein
583.m05706	1.10358	0.0157733	hypothetical protein
583.m05672	1.09947	0.0327354	SRS domain-containing surface antigen, putative
31.m00885	1.09465	0.00445903	hypothetical protein
86.m00361	1.08758	0.0106093	UV excision repair protein rhp23, putative
50.m03345	1.08621	0.032164	mitochondria-associated granulocyte macrophage CSF signaling molecule, putative
42.m03335	1.08569	0.045548	hypothetical protein
31.m00087	1.08308	0.0132453	hypothetical protein
55.m04649	1.06984	0.00532293	ATP-dependent helicase, putaive
50.m03170	1.06803	0.0149076	hypothetical protein
641.m01557	1.03825	0.0360618	ubiquinol-cytochrome C reductase, putative

## Sheet: GCN5-A KO down-regulated
Gene ID	Fold change	P value	Product description
42.m03554	-12.3155	0.0175437	glutaredoxin, putative
44.m04677	-11.2068	0.00188222	hypothetical protein
76.m01634	-9.88868	0.0223842	hypothetical protein
20.m03985	-8.94268	0.0148716	megakaryocyte stimulating factor, putative
541.m01242	-8.2288	0.0108715	hypothetical protein
42.m03508	-6.6975	0.000632527	hypothetical protein
55.m04769	-6.30803	0.0484394	sporozoite-specific SAG protein
76.m01696	-5.58919	0.034117	hypothetical protein
641.m01496	-5.42116	0.019747	transhydrogenase, putative
50.m07088	-5.3053	0.0414781	hypothetical protein
86.m00371	-5.09418	0.00383716	hypothetical protein
541.m01247	-5.03467	0.044882	platelet binding protein GspB, putative
20.m05963	-4.93648	0.0188958	hypothetical protein
65.m01170	-4.79489	3.97115e-05	hypothetical protein
52.m02726	-4.77966	6.34032e-05	hypothetical protein
57.m03094	-4.66476	0.0491724	glutathione/thioredoxin peroxidase, putative
50.m07122	-4.50322	0.0307419	hypothetical protein
52.m03443	-4.44443	0.00217721	hypothetical protein
77.m00087	-4.19812	0.0034308	hypothetical protein
65.m01130	-3.81855	0.0309505	hypothetical protein
25.m01794	-3.79442	0.00847088	hypothetical protein
145.m00330	-3.56781	0.000160623	hypothetical protein
20.m00368	-3.55445	2.65887e-06	transmembrane domain-containing protein
49.m03176	-3.50859	6.52814e-05	hypothetical protein
50.m03090	-3.45058	2.54264e-05	hypothetical protein
59.m03419	-3.44049	0.000537117	hypothetical protein
52.m03461	-3.37319	0.00067576	conserved hypothetical protein
59.m03370	-3.36322	2.34521e-05	hypothetical protein
49.m05665	-3.31166	0.000170312	protein kinase, putative
65.m01106	-3.29612	0.000201762	hypothetical protein
33.m01360	-3.29473	6.97573e-05	hypothetical protein
33.m02667	-3.27654	0.00328354	hypothetical protein
50.m07108	-3.26635	0.000184899	hypothetical protein
641.m01514	-3.2356	0.000943385	SRS domain-containing protein
37.m00005	-3.22923	8.90926e-05	hypothetical protein
83.m02139	-3.20967	7.85084e-06	hypothetical protein
80.m05017	-3.19234	0.00052024	hypothetical protein
69.m00262	-3.17447	4.55641e-06	hypothetical protein
20.m07367	-2.95353	0.00488061	Toluene-4-monooxygenase system protein B-related
583.m05627	-2.91656	0.0124943	hypothetical protein
42.m03382	-2.82176	0.00511786	retinitis pigmentosa GTPase regulator-related
59.m03529	-2.79048	7.91048e-05	hypothetical protein
59.m03715	-2.75343	0.000155575	hypothetical protein
46.m01600	-2.74407	0.00030247	surface antigen, putative
44.m02540	-2.74247	0.0047431	hypothetical protein
80.m02249	-2.7389	0.00107974	N-acetyltransferase 5, putative
59.m07778	-2.73885	0.000125918	conserved hypothetical protein
645.m00544	-2.68156	0.00122504	hypothetical protein
49.m03106	-2.67521	0.0182567	SRS domain-containing protein
113.m00813	-2.573	0.00185685	hypothetical protein
44.m02688	-2.55468	4.14244e-05	ppg3, putative
583.m05621	-2.55335	0.000238	hypothetical protein
20.m03893	-2.55195	0.033439	hypothetical protein
50.m07651	-2.55113	0.00173328	conserved hypothetical protein
57.m01886	-2.54795	0.0120507	hypothetical protein
50.m03406	-2.54009	0.000844982	hypothetical protein
42.m03493	-2.53756	7.39309e-05	hypothetical protein
37.m00011	-2.53638	0.000327218	hypothetical protein
57.m01688	-2.53	0.00197607	hypothetical protein
42.m03640	-2.52193	0.000593932	hypothetical protein
83.m02142	-2.51488	1.20619e-05	transmembrane domain-containing protein
50.m03299	-2.48959	0.000249463	conserved hypothetical protein
35.m00027	-2.44667	6.7213e-05	ankyrin repeat-containing protein
76.m00018	-2.43889	0.00148739	hypothetical protein
57.m03133	-2.42777	0.000594361	hypothetical protein
59.m03387	-2.42545	0.0229773	RAD2 endonuclease-related
59.m03420	-2.40886	0.000261882	hypothetical protein
55.m08207	-2.40461	2.45125e-05	carbonic anhydrase-related
65.m01969	-2.40318	1.14975e-05	hypothetical protein
42.m03509	-2.37011	0.000761332	calmodulin-domain protein kinase, putative
33.m01327	-2.36784	0.0416514	hypothetical protein
50.m03312	-2.347	0.0120738	hypothetical protein
52.m03462	-2.34256	0.00423453	conserved hypothetical protein
35.m00933	-2.33808	0.000208396	ATPase, AFG1 family domain-containing protein
583.m05626	-2.32874	0.00445122	hypothetical protein
52.m00026	-2.32765	0.000696409	hypothetical protein
644.m00074	-2.31422	0.00468249	hypothetical protein
44.m02792	-2.30308	0.000128942	hypothetical protein
49.m03257	-2.29106	0.000888565	hypothetical protein
42.m03544	-2.29015	7.36278e-05	hypothetical protein
37.m00763	-2.27751	0.000273744	dynein light chain, putative
80.m02212	-2.27567	0.00115289	white protein, putative
76.m03394	-2.26971	0.0423443	conserved hypothetical protein
583.m05630	-2.26969	8.32826e-05	hypothetical protein
33.m01282	-2.26665	0.00113168	conserved hypothetical protein
42.m03410	-2.26498	0.00210785	hypothetical protein
80.m02124	-2.26329	0.00010874	hypothetical protein
49.m05708	-2.26316	0.00972958	G-protein beta-subunit (transducin), putative
33.m02671	-2.24414	0.0244307	hypothetical protein
641.m01580	-2.24281	0.000138469	outer membrane protein romA
641.m01481	-2.22969	0.0038126	zinc finger (C3HC4 RING finger) protein, putative
44.m04611	-2.22867	0.00219609	hypothetical protein
25.m02928	-2.22348	0.000502949	phosphatidylethanolamine-binding protein homolog, putative
33.m01326	-2.21326	0.000718879	hypothetical protein
50.m07652	-2.18305	0.00161695	hypothetical protein
162.m00513	-2.17798	0.0108373	DnaJ domain-containing zinc finger (C2H2 type) protein, putative
59.m06054	-2.17742	0.0108767	hypothetical protein
59.m03401	-2.17344	0.000359842	CHCH domain-containing protein
50.m03102	-2.16304	0.00050645	hypothetical protein
33.m01347	-2.16213	0.000303667	F-box domain-containing protein
39.m00359	-2.16114	3.59314e-05	hypothetical protein
551.m00234	-2.14977	0.00600629	zinc-finger protein ZPR1, putative
46.m03685	-2.14246	0.00910226	2Fe-2S iron-sulfur cluster binding domain containing protein
49.m00054	-2.14092	0.00023245	hypothetical protein
20.m03958	-2.13589	0.000160177	insulinase-related
49.m00068	-2.12732	0.0030567	guanylate kinase, putative
50.m03181	-2.12268	0.00556049	leucine rich repeat protein, putative
20.m03764	-2.12133	0.00251557	cell wall protein-related
49.m05663	-2.12121	1.20528e-06	hypothetical protein
65.m01151	-2.1196	0.0116415	1,3-beta-glucan synthase component-containing protein
42.m00006	-2.10896	0.000337746	serine/threonine protein phosphatase, putative
57.m03970	-2.10839	0.0305324	hypothetical protein
35.m00904	-2.10706	0.016162	hypothetical protein
44.m04666	-2.10672	0.0269419	PAN domain-containing protein
31.m00881	-2.10005	0.00312096	hypothetical protein
57.m01769	-2.09928	0.000201619	hypothetical protein
76.m01628	-2.09078	2.41573e-05	hypothetical protein
207.m00013	-2.08895	0.0202396	clpb protein
42.m03325	-2.08324	0.0440698	hypothetical protein
583.m00678	-2.07938	0.0031926	hypothetical protein
65.m01180	-2.07296	0.0428836	conserved hypothetical protein
52.m02675	-2.06614	0.00385056	hypothetical protein
145.m00583	-2.06269	0.000762067	hypothetical protein
44.m02689	-2.05819	0.00875288	hypothetical protein
83.m00011	-2.04274	0.000119144	hypothetical protein
31.m00891	-2.04135	0.00571169	hypothetical protein
641.m01499	-2.03886	0.0126195	RNA recognition motif. (a.k.a. RRM, RBD, or RNP domain)-containing protein
42.m00054	-2.03835	0.00159703	conserved hypothetical protein
49.m03227	-2.03797	0.00279379	hypothetical protein
55.m04690	-2.03743	0.00423112	hypothetical protein
80.m02136	-2.03639	0.00842396	hypothetical protein
583.m05523	-2.03552	0.00982894	oxidoreductase, putative
49.m03256	-2.03396	0.00573654	hypothetical protein
76.m02654	-2.0315	0.000579263	hypothetical protein
52.m01623	-2.031	0.00858374	XAP5 protein, putative
80.m02160	-2.03074	0.0216114	hypothetical protein
65.m01135	-2.02814	0.0283453	hypothetical protein
20.m03860	-2.01926	0.000555412	subtilase family serine protease, putative
20.m03916	-2.01816	0.0159955	RNA helicase, putative
46.m02884	-2.01788	0.000413267	hypothetical protein
49.m00045	-2.01652	0.0057188	bcs1 protein, putative
80.m00085	-2.00922	4.11856e-05	hypothetical protein
49.m03124	-2.00902	7.55985e-05	hypothetical protein
83.m00006	-2.00788	0.00021259	hypothetical protein
42.m03394	-2.00463	0.0244283	calcium-dependent protein kinase, putative / calmodulin-domain protein kinase, putative
59.m00046	-2.0023	0.00619898	hypothetical protein
27.m00866	-2.00064	0.0152533	hypothetical protein
20.m03886	-1.99658	0.00111661	hypothetical protein
113.m00778	-1.99651	0.0377543	hypothetical protein
42.m03306	-1.99239	0.0346778	conserved hypothetical protein
80.m05396	-1.98504	0.00511141	serine/threonine-protein kinase, putative
20.m03849	-1.98073	7.50112e-05	membrane-attack complex (MAC)/Perforin domain-containing protein
44.m02742	-1.97762	3.64e-06	conserved hypothetical protein
44.m02610	-1.9749	0.00203877	hypothetical protein
55.m04719	-1.97411	0.0275238	hypothetical protein
20.m00387	-1.97181	0.000372753	subtilase family serine protease, putative
583.m05667	-1.96752	0.00022781	alanine dehydrogenase, putative
46.m01728	-1.96236	0.00176269	exonuclease domain-containing protein
52.m00017	-1.96155	0.00141572	hypothetical protein
46.m01628	-1.96147	0.00936058	hypothetical protein
27.m00099	-1.95558	2.36831e-05	hypothetical protein
239.m00011	-1.95472	0.0101059	hypothetical protein
42.m00042	-1.95111	0.00146168	hypothetical protein
64.m00341	-1.94859	0.00062939	hypothetical protein
42.m00076	-1.94102	6.57756e-05	hypothetical protein
50.m03277	-1.94054	0.000113485	endonuclease/exonuclease/phosphatase domain-containing protein
44.m02611	-1.93983	0.000372012	hypothetical protein
59.m03721	-1.93849	0.0227655	hypothetical protein
49.m03260	-1.93757	0.00778685	hypothetical protein
8.m00194	-1.93691	0.00650539	hypothetical protein
20.m00337	-1.93626	0.000608256	hypothetical protein
41.m01333	-1.9352	0.00052445	hypothetical protein
46.m01697	-1.93233	0.00192978	hypothetical protein
55.m04744	-1.93204	0.000255426	hypothetical protein
86.m00372	-1.92965	0.0263389	hypothetical protein
46.m00029	-1.92843	0.00117248	pyrroline-5-carboxylate reductase, putative
33.m01324	-1.92777	0.0246319	hypothetical protein
44.m02715	-1.92692	1.66636e-06	hypothetical protein
76.m01629	-1.92226	0.00428267	hypothetical protein
541.m01203	-1.92194	0.000401743	hypothetical protein
540.m00192	-1.91812	0.000118	hypothetical protein
55.m05046	-1.91586	0.00835467	hypothetical protein
80.m05016	-1.91501	0.0478622	hypothetical protein
33.m02669	-1.91495	0.0129964	conserved hypothetical protein
57.m00026	-1.91397	0.00259571	hypothetical protein
26.m00237	-1.91333	0.0216492	hypothetical protein
20.m03710	-1.91222	0.000173904	glycoprotease family domain-containing protein
38.m01896	-1.90821	1.56056e-05	hypothetical protein
49.m00039	-1.90758	0.000123783	hypothetical protein
44.m04646	-1.90722	0.0016209	hypothetical protein
49.m03280	-1.9067	0.014929	NUDIX hydrolase domain-containing protein
44.m04637	-1.90012	0.00192717	tRNA splicing 2' phosphotransferase 1, putative
80.m02181	-1.89891	3.33268e-05	hypothetical protein
41.m01349	-1.89636	0.0062859	hypothetical protein
583.m05590	-1.89536	0.024933	hypothetical protein
42.m03572	-1.89535	5.73615e-05	conserved hypothetical protein
74.m00457	-1.89527	0.0209604	hypothetical protein
129.m00247	-1.89502	0.0028286	hypothetical protein
50.m03269	-1.89082	0.00454597	zinc knuckle domain-containing protein
76.m01659	-1.88875	0.00354419	hypothetical protein
70.m00040	-1.88837	0.000276112	hypothetical protein
20.m03898	-1.88796	2.45524e-05	hypothetical protein
80.m02227	-1.88687	0.00107726	hypothetical protein
588.m00009	-1.8814	0.00302933	hypothetical protein
20.m03845	-1.87721	0.0311672	YT521-B-like family domain-containing protein
59.m08335	-1.87527	0.000484264	hypothetical protein
25.m01745	-1.87425	0.00536393	tubulin delta chain, putative
20.m03858	-1.87215	0.00100769	hypothetical protein
42.m03471	-1.87212	0.00670203	hypothetical protein
80.m03990	-1.87208	0.00373714	hypothetical protein
46.m00025	-1.87152	9.11008e-05	hypothetical protein
59.m06125	-1.87127	0.000248224	hypothetical protein
641.m01493	-1.86764	0.0011032	mrp protein, putative
38.m00014	-1.86647	8.8991e-05	calcium-dependent protein kinase, putative / calmodulin-domain protein kinase, putative
44.m02720	-1.86621	0.00301037	RNA polymerase Rpb1 C-terminal repeat domain-containing protein / exonuclease domain-containing protein
50.m03206	-1.86146	0.00747949	conserved hypothetical protein
55.m04625	-1.85903	0.00514888	hypothetical protein
59.m03600	-1.85879	0.00187907	hypothetical protein
52.m02683	-1.85615	0.00578822	hypothetical protein
59.m03649	-1.85399	0.0185339	hypothetical protein
86.m00395	-1.8359	5.15111e-06	hypothetical protein
81.m00022	-1.82688	8.30903e-05	hypothetical protein
42.m03607	-1.82258	0.0016403	pulmonary surfactant-associated protein D precursor-related
583.m05352	-1.82167	8.04543e-05	hypothetical protein
59.m07736	-1.82161	0.00249587	conserved hypothetical protein
583.m00680	-1.81499	0.0063924	DnaJ domain-containing protein
20.m03959	-1.81234	8.68398e-05	hypothetical protein
57.m01796	-1.81152	0.0140225	hypothetical protein
59.m03569	-1.81002	0.00105535	hypothetical protein
80.m00008	-1.80375	0.0015153	Hsp20/alpha crystallin domain-containing protein
20.m03954	-1.80044	0.00226105	dihydrolipoyl dehydrogenase, putative
50.m03150	-1.8002	0.000197854	hypothetical protein
46.m02921	-1.79976	0.00269064	hypothetical protein
80.m00051	-1.79859	1.69622e-06	cathepsin C-related
86.m00398	-1.79721	0.00206756	hypothetical protein
645.m00037	-1.7956	0.00580968	cathepsin L-like thiolproteinase, putative
59.m03396	-1.79156	0.0249524	clp ATP-binding chain B1, putative
38.m00001	-1.78993	0.0099955	thrombospondin-related protein-1, putative
37.m00761	-1.7887	0.00137915	hypothetical protein
20.m07355	-1.78819	0.00105126	hypothetical protein
583.m05736	-1.78806	1.64383e-06	hypothetical protein
65.m01134	-1.78737	0.0272888	conserved hypothetical protein
57.m01859	-1.78409	0.026791	hypothetical protein
41.m01312	-1.78163	0.0262159	ppg3, putative
41.m01269	-1.78088	0.000818384	hypothetical protein
55.m04985	-1.77811	0.00441178	lipase domain-containing protein
35.m00909	-1.7634	0.000800667	hypothetical protein
541.m01178	-1.7631	0.00727979	radical SAM domain-containing protein
25.m01812	-1.76298	0.0421705	hypothetical protein
20.m05899	-1.76018	0.00902724	hypothetical protein
83.m01182	-1.75941	0.00247924	hypothetical protein
75.m00012	-1.75792	0.0305687	hypothetical protein
59.m03670	-1.75768	0.000908021	hypothetical protein
78.m00007	-1.75767	0.0440254	hypothetical protein
80.m02221	-1.75232	0.00109097	conserved hypothetical protein
50.m05624	-1.75221	0.00117833	hypothetical protein
57.m01733	-1.75183	0.0463159	hypothetical protein
49.m05721	-1.75181	0.0352201	ankyrin repeat-containing protein
50.m05667	-1.74961	0.00432481	hypothetical protein
76.m01632	-1.7492	0.0172215	hypothetical protein
80.m02251	-1.74682	8.68753e-05	hypothetical protein
57.m01708	-1.74638	0.00115206	sodium-dependent transporter, putative
35.m01983	-1.74414	0.00452542	conserved hypothetical protein
80.m02174	-1.74349	0.000573864	hypothetical protein
31.m00860	-1.74311	0.029382	hypothetical protein
72.m00687	-1.74245	0.00627877	lysine decarboxylase, putative
57.m00010	-1.74162	0.000206824	dihydrouridine synthase domain-containing protein
583.m09092	-1.73979	0.00626675	hypothetical protein
86.m00844	-1.73924	0.00216251	hypothetical protein
44.m04698	-1.73796	0.000434878	hypothetical protein
80.m02365	-1.73787	0.00128251	hypothetical protein
20.m05912	-1.73617	1.06956e-05	hypothetical protein
59.m03523	-1.73231	0.00488307	HECT type ubiquitin ligase, putative
74.m00444	-1.7314	0.000107767	hypothetical protein
50.m00060	-1.73069	0.000540994	nudix (nucleoside diphosphate linked moiety X)-type motif 9
145.m00326	-1.73024	0.000892381	hypothetical protein
31.m00861	-1.72815	0.00504312	hypothetical protein
42.m00120	-1.72777	0.00362586	zinc finger (C3HC4 RING finger) protein, putative
42.m03289	-1.72751	0.00203537	hypothetical protein
80.m03958	-1.72673	0.00203829	formate/nitrite transporter, putative
55.m00229	-1.724	2.61036e-05	hypothetical protein
52.m03437	-1.72304	0.00537996	conserved hypothetical protein
59.m03557	-1.72248	0.0420393	hypothetical protein
38.m01043	-1.72102	0.000479266	immunoglobulin-binding protein, putative
52.m03453	-1.72017	0.011064	conserved hypothetical protein
25.m01863	-1.71924	0.000551597	hypothetical protein
42.m03346	-1.71923	0.00460886	vacuolar assembly protein-related
80.m03994	-1.71921	0.00225838	endonuclease/exonuclease/phosphatase domain-containing protein
65.m02512	-1.71862	0.0142805	hypothetical protein
20.m03746	-1.71648	0.00322229	dihydrouridine synthase domain-containing protein
44.m00008	-1.71566	0.00181168	GPI-anchored surface protein
46.m01745	-1.71516	0.000585444	hypothetical protein
37.m00744	-1.71402	0.001228	hypothetical protein
583.m11432	-1.71279	0.000349522	conserved hypothetical protein
52.m01655	-1.711	0.000180165	hypothetical protein
65.m01113	-1.7102	0.0125697	hypothetical protein
42.m07394	-1.70519	0.000322705	hypothetical protein
25.m01800	-1.70355	0.0014499	pinA, putative
76.m03398	-1.70097	0.0116675	hypothetical protein
37.m00013	-1.70095	0.00109258	DNA-directed RNA polymerase II, 8.2 kDa polypeptide, putative
76.m01544	-1.69963	0.000281324	hypothetical protein
41.m01268	-1.69918	0.000146578	hypothetical protein
55.m00219	-1.6978	0.0227759	hypothetical protein
42.m03352	-1.69493	0.0025407	hypothetical protein
42.m00073	-1.693	0.00747714	zinc finger (CCCH type) protein, putative
541.m02042	-1.69127	0.000503	programmed cell death protein, putative
59.m03494	-1.68845	0.00160567	hypothetical protein
55.m04998	-1.68844	0.021766	hypothetical protein
42.m07414	-1.6874	0.00190024	hypothetical protein
37.m01281	-1.68645	0.00261818	REX1 DNA repair domain-containing protein
76.m00014	-1.68301	0.000728489	hypothetical protein
44.m02607	-1.68232	0.00322597	hypothetical protein
65.m02516	-1.68163	0.0373358	conserved hypothetical protein
583.m00595	-1.67755	0.000746462	conserved hypothetical protein
80.m03965	-1.6775	0.022601	hypothetical protein
25.m01869	-1.67642	0.00143035	hypothetical protein
55.m00259	-1.67488	0.000329524	hypothetical protein
49.m03371	-1.67065	0.00140526	hypothetical protein
31.m00915	-1.66923	0.0400453	hypothetical protein
26.m00241	-1.66886	0.0100996	DEAD/DEAH box helicase, putative
49.m03273	-1.66692	0.00717081	vesicle transport v-SNARE, putative
63.m00155	-1.66355	0.0039527	hypothetical protein
25.m00186	-1.66059	0.0010356	hypothetical protein
20.m03768	-1.65871	0.00199404	hypothetical protein
20.m05947	-1.65734	0.00184314	hypothetical protein
27.m00080	-1.6564	0.0106677	RNA-binding protein, putative
44.m00027	-1.65402	0.000372871	hypothetical protein
55.m05005	-1.65323	0.00023363	hypothetical protein
39.m00619	-1.65312	0.0145753	hypothetical protein
55.m04768	-1.65262	0.00169243	hypothetical protein
55.m10328	-1.65146	0.00119594	hypothetical protein
20.m05927	-1.64957	0.0497577	hypothetical protein
59.m00018	-1.64921	0.0145164	WD domain, G-beta repeat-containing protein
65.m01199	-1.64786	0.0377488	p53 protein kinase-related
49.m03359	-1.64491	0.000151043	acetyltransferase domain-containing protein
59.m03465	-1.64308	0.00129516	hypothetical protein
50.m05689	-1.64052	0.0213171	hypothetical protein
49.m03420	-1.63889	0.000976479	mitochondrial carrier domain-containing protein
129.m00244	-1.63823	5.67199e-05	RNA pseudouridylate synthase, putative
20.m00347	-1.63791	0.0148878	protein phosphatase 2C, putative
50.m03389	-1.63698	0.00212445	transmembrane protein, putative
33.m02677	-1.63542	0.000712657	Tim10/DDP family zinc finger containing protein
44.m02747	-1.63398	0.0028479	hypothetical protein
25.m01817	-1.63221	0.00246926	hypothetical protein
49.m05682	-1.63172	0.0257563	PAK1 interacting protein-related
39.m00618	-1.63159	0.0183574	hypothetical protein
52.m02718	-1.62895	0.0144669	DNA polymerase delta subunit 4, putative
76.m02670	-1.62891	0.00194482	3' exoribonuclease-related
641.m00190	-1.62788	0.000180338	tRNA-splicing endonuclease positive effector, putative
541.m02038	-1.62725	0.000247858	hypothetical protein
59.m00082	-1.62552	0.0242655	hypothetical protein
20.m03733	-1.62454	0.000454654	hypothetical protein
37.m00751	-1.62097	0.000909715	bacterial transferase hexapeptide-related
55.m00014	-1.61937	0.000334377	microneme protein 7 (MIC7)
46.m02873	-1.61803	0.0367623	hypothetical protein
83.m02704	-1.61765	0.00671723	conserved hypothetical protein
59.m03599	-1.61699	0.000321923	conserved hypothetical protein
38.m01103	-1.61522	2.06097e-05	acetoacetyl-CoA synthetase, putative
59.m06120	-1.61373	0.0198371	hypothetical protein
33.m01365	-1.6117	0.00101607	zinc finger (C3HC4 RING finger) protein, putative
41.m01294	-1.61104	0.0224911	hypothetical protein
42.m03274	-1.61103	0.00418524	inner dynein arm I1 intermediate chain IC140-related
31.m00871	-1.61062	0.0014463	hypothetical protein
41.m02365	-1.6105	0.00578265	fibronectin-related
50.m03169	-1.6082	0.00237099	hypothetical protein
583.m05417	-1.60782	0.00870588	glucoamylase S1/S2-related
35.m00013	-1.60683	7.45697e-05	transmembrane domian-containing protein
55.m05071	-1.60625	0.0405287	26S proteasome non-ATPase regulatory subunit-related
55.m04899	-1.60445	0.000393903	hypothetical protein
52.m00018	-1.60391	0.000360553	hypothetical protein
49.m03345	-1.60309	0.00081328	OTU-like cysteine protease domain-containing protein
83.m00019	-1.60253	0.0281795	dynein heavy chain, putative
42.m00127	-1.60174	0.00660982	dgat2l1-prov protein
39.m00623	-1.60134	0.000507345	proline-rich protein
50.m03121	-1.60051	0.000793355	hypothetical protein
59.m03635	-1.59936	0.000141944	conserved hypothetical protein
80.m02263	-1.59819	0.0151019	conserved hypothetical protein
44.m04663	-1.59791	0.037902	hypothetical protein
583.m05290	-1.59785	0.00450758	hypothetical protein
42.m00033	-1.59633	0.0165411	zinc finger DHHC domain-containing protein
59.m03524	-1.59469	0.0307934	ATP-dependent RNA helicase, putative
42.m00112	-1.59315	0.00610302	hypothetical protein
46.m02899	-1.59103	0.0188019	hypothetical protein
583.m05555	-1.59068	0.0280571	hypothetical protein
46.m02918	-1.59037	0.00249955	hypothetical protein
541.m01219	-1.58969	0.0328041	formin binding protein, putative
20.m03806	-1.58817	0.0071569	RNA binding protein, putative
37.m00765	-1.5873	0.010913	neurofilament triplet H protein-related
542.m00217	-1.58715	0.0268558	platelet binding protein GspB, putative
42.m03313	-1.58715	0.000595217	RNA-binding protein, putative
49.m03293	-1.58441	0.00423366	iron only hydrogenase large subunit, C-terminal domain-containing protein
583.m05599	-1.58417	5.81375e-05	hypothetical protein
583.m09182	-1.57925	0.000144728	hypothetical protein
59.m00084	-1.57777	0.000310145	NLI interacting factor-like phosphatase domain-containing protein
583.m09164	-1.5776	0.000415984	hypothetical protein
52.m01527	-1.57737	0.00299795	hypothetical protein
583.m05524	-1.57634	0.000714551	eukaryotic translation initiation factor 2B, putative
52.m02684	-1.57429	4.08965e-05	hypothetical protein
28.m00433	-1.57425	0.0150878	hypothetical protein
50.m00081	-1.57407	0.000318301	ribosomal protein L7, putative
59.m00035	-1.57384	0.0334066	hypothetical protein
25.m00201	-1.57292	0.0112094	radical SAM domain-containing protein
44.m02565	-1.5725	0.00159915	p25-alpha domain-containing protein
83.m02700	-1.57237	0.00133213	14 kDa transmembrane protein-related
583.m05576	-1.57069	0.000846944	hypothetical protein
551.m00001	-1.5702	0.00674116	surface antigen
63.m00001	-1.57016	3.7971e-07	hypothetical protein / jlp2
27.m00826	-1.56967	0.000810619	conserved hypothetical protein
44.m02583	-1.56741	0.00142205	hornerin-related
76.m01546	-1.56721	0.00238967	DnaJ domain-containing protein
583.m05475	-1.56717	0.00573322	ATP-dependent RNA helicase, putative
39.m00367	-1.56709	0.0418588	hypothetical protein
540.m00203	-1.56653	0.000802358	protein kinase-related
20.m03765	-1.56472	9.66089e-05	conserved hypothetical protein
65.m01201	-1.56313	0.00489032	tubulin-tyrosine ligase family protein
42.m03373	-1.56312	0.00312994	hypothetical protein
50.m03350	-1.56059	8.71073e-06	microtubule-binding protein, putative
42.m03393	-1.55863	0.0269429	fast skeletal muscle troponin C-related
583.m05583	-1.55785	0.0467479	glutamic acid rich protein-related
52.m01627	-1.55779	0.0445667	hypothetical protein
44.m02632	-1.55733	0.000348342	hypothetical protein
41.m02947	-1.5567	0.00815468	hypothetical protein
583.m05415	-1.55654	0.0152527	hypothetical protein
59.m03658	-1.55467	0.00384575	hypothetical protein
76.m03395	-1.55354	0.000400652	conserved hypothetical protein
28.m00304	-1.55331	0.00133239	conserved hypothetical protein
28.m00307	-1.553	0.000594579	hypothetical protein
83.m01237	-1.5522	4.23501e-05	chitinase class I, putative
83.m01198	-1.54965	0.00108668	hypothetical protein
83.m01208	-1.54929	0.0114715	arginine N-methyltransferase-related
46.m01756	-1.54917	0.00672942	protein phosphatase 2C, putative
583.m09114	-1.54666	0.00572512	ras-related protein RAB2A, putative
541.m01169	-1.54563	0.00717595	mRNA capping enzyme, putative
50.m03403	-1.54536	0.00808972	flap endonuclease-1, putative
50.m03186	-1.54319	0.0129895	conserved hypothetical protein
50.m05602	-1.54288	0.0179844	hypothetical protein
80.m02284	-1.54177	0.00251963	hypothetical protein
583.m00011	-1.54107	0.0137374	subtilase family serine protease, putative
583.m05602	-1.53946	0.0188302	hypothetical protein
20.m03944	-1.53763	0.00199795	hypothetical protein
46.m01640	-1.53708	0.0109648	hypothetical protein
644.m00103	-1.53666	0.012739	hypothetical protein
80.m02254	-1.5345	0.0338904	hypothetical protein
42.m03604	-1.53397	8.67114e-06	hypothetical protein
55.m00223	-1.53396	3.69798e-05	mitochondrial 39-S ribosomal protein L47 (MRP-L47) domain-containing protein
49.m05734	-1.5337	0.0185656	trichohyalin, putative
25.m01738	-1.53354	0.0189482	hypothetical protein
41.m01342	-1.53324	0.00155868	dense-granule antigen DG32, putative
541.m00136	-1.53297	0.0379712	peptidyl-prolyl cis-trans isomerase, putative
46.m01601	-1.53296	0.000697511	hypothetical protein
645.m00306	-1.53254	0.0362394	hypothetical protein
42.m03388	-1.53167	0.00572926	long-chain fatty acid transport protein precursor-related
42.m03546	-1.53063	0.00710623	protein kinase-related
42.m00094	-1.53037	0.000582964	transmembrane amino acid transporter domain-containing protein
59.m03560	-1.52859	0.000721444	hypothetical protein
55.m04919	-1.52786	0.0134758	hypothetical protein
80.m03956	-1.52768	0.0255087	hypothetical protein
39.m00366	-1.5265	0.0017947	UBX domain-containing protein
641.m01525	-1.52558	0.0288713	hypothetical protein
44.m02693	-1.52521	0.00729287	hypothetical protein
59.m06086	-1.52467	0.000355467	hypothetical protein
42.m05850	-1.52459	0.00699288	F-box domain-containing protein
55.m10255	-1.52333	0.0276755	diacylglycerol kinase, putative
583.m09154	-1.52186	0.0255242	hypothetical protein
76.m00003	-1.5209	0.000619815	cAMP-dependent protein kinase catalytic subunit
50.m00094	-1.52019	0.00204259	hypothetical protein
55.m04975	-1.52017	0.0292237	hypothetical protein
52.m02706	-1.51963	0.00444022	hypothetical protein
57.m03968	-1.51905	9.5038e-06	conserved hypothetical protein
42.m00071	-1.51903	0.000274346	hypothetical protein
59.m03623	-1.51882	0.00439226	hypothetical protein
83.m01302	-1.51559	0.00306005	hypothetical protein
20.m05935	-1.51547	0.0261943	hypothetical protein
50.m05687	-1.51533	0.00679266	hypothetical protein
59.m03700	-1.51142	0.000656857	hypothetical protein
38.m00003	-1.51064	0.000445739	microneme protein 6 (MIC6)
162.m00324	-1.51024	0.0223505	hypothetical protein
583.m05671	-1.5094	0.000629943	hypothetical protein
50.m03146	-1.50927	0.00353202	hypothetical protein
641.m01527	-1.5089	0.00150221	hypothetical protein
55.m00103	-1.50863	0.000582694	hypothetical protein
57.m01844	-1.50722	0.0362843	hypothetical protein
20.m03744	-1.50682	0.00133836	hypothetical protein
80.m02356	-1.5062	0.00014012	hypothetical protein
59.m00024	-1.5054	4.83913e-05	adenylate kinase-related
41.m01381	-1.50416	0.00545429	inositol monophosphatase, putative
72.m00388	-1.5033	0.021524	hypothetical protein
583.m00669	-1.50192	0.01023	phosphatidylinositol-4-phosphate 5-kinase, putative
583.m00598	-1.49999	0.0147099	oligoribonuclease-related
28.m00290	-1.49969	0.0213462	hypothetical protein
583.m00652	-1.49827	0.00206642	hypothetical protein
50.m03103	-1.49791	0.00266997	serine protease inhibitor, putative
541.m02048	-1.49738	0.00955941	hypothetical protein
50.m00002	-1.49737	0.000184597	microneme protein 8 (MIC8)
86.m00365	-1.49728	0.0009236	hypothetical protein
50.m03413	-1.49635	2.61123e-05	proteasome activator subunit, putative
50.m03082	-1.49534	3.7055e-06	conserved hypothetical protein
583.m11473	-1.49431	0.0372127	hypothetical protein
50.m03416	-1.49417	0.00482814	hypothetical protein
41.m00040	-1.49394	0.00715103	transmembrane domain-containing protein
80.m02289	-1.49332	0.00103994	WD-40 repeat protein, putative
50.m03414	-1.49314	0.032456	hypothetical protein
55.m05069	-1.49296	0.000349334	hypothetical protein
41.m02362	-1.49247	0.0480579	dual specificity protein phosphatase, catalytic domain-containing protein
641.m01512	-1.49239	0.00382296	kelch motif domain-containing protein
50.m03296	-1.4914	0.00100015	translation initiation factor SUI1, putative
583.m05768	-1.49054	0.014946	cullin homog, putative
50.m05695	-1.49038	0.0159918	hypothetical protein
41.m01275	-1.49002	0.0123872	acetyltransferase domain-containing protein
50.m05622	-1.48994	0.00411512	hypothetical protein
44.m02619	-1.48955	0.0052432	autophagy protein-related
583.m09210	-1.48902	0.0364277	hypothetical protein
57.m01826	-1.48852	0.0402091	calcium/calmodulin-dependent protein kinase II, putative
49.m00025	-1.48834	0.00956715	SCP-like extracellular domain-containing protein
20.m03838	-1.48831	0.024759	hypothetical protein
49.m03147	-1.4883	0.00149112	calcium/calmodulin-dependent protein kinase II, putative
55.m05015	-1.48822	0.000109695	ADP-ribosylation factor domain-containing protein
59.m07762	-1.48806	0.00362758	hypothetical protein
41.m02954	-1.4875	0.00687509	hypothetical protein
44.m02687	-1.48733	0.000356551	hypothetical protein
27.m00863	-1.48684	0.000197273	hypothetical protein
46.m01626	-1.48404	0.00117775	hypothetical protein
59.m00073	-1.48253	0.00240054	lipoate-protein ligase A, putative
31.m00910	-1.48231	0.00640131	lanthionine synthetase C-like protein 1, putative
49.m03161	-1.48226	0.0207703	nucleotidase, putative
83.m01190	-1.48107	0.00799587	3', 5'-cyclic nucleotide phosphodiesterase domain-containing protein
86.m00370	-1.47938	0.00210954	hypothetical protein
42.m03283	-1.47882	0.0182892	hypothetical protein
59.m03391	-1.47746	0.000228741	rhomboid family domain-containing protein
42.m03395	-1.47589	0.00287967	NNP-1 protein-related
52.m00003	-1.47403	0.0125553	microtubial-binding protein, putative
20.m00002	-1.47375	0.000454852	microneme protein 2 (MIC2)
59.m06114	-1.47175	0.00306042	hypothetical protein
57.m01759	-1.47021	0.00132551	conserved hypothetical protein
583.m05265	-1.46986	0.00156423	hypothetical protein
59.m07751	-1.46944	0.0354817	conserved hypothetical protein
80.m02285	-1.46777	0.00504383	conserved hypothetical protein
55.m04878	-1.46741	0.0429367	GTP-binding protein, putative
541.m01168	-1.46579	0.0290834	DNA excision repair protein, putative
55.m10225	-1.46529	0.00304737	hypothetical protein
55.m00250	-1.46482	0.000765209	armadillo/beta-catenin-like repeat-containing protein
65.m01967	-1.4646	0.00142284	hypothetical protein
25.m00003	-1.46431	0.00365953	serine proteinase inhibitor, putative
31.m00928	-1.46349	0.00295615	hypothetical protein
76.m00007	-1.46241	0.0387241	peptidyl-prolyl isomerase, putative
80.m00001	-1.4618	0.00245101	heat shock protein 90
583.m00684	-1.46147	0.0387109	general transcription factor IIIC, polypeptide 3, putative
57.m01746	-1.4597	0.0244019	hypothetical protein
25.m00202	-1.45943	0.0475198	nucleolar phosphoprotein p130, putative
76.m00001	-1.45773	0.000153505	glucose-6-phosphate isomerase, putative
41.m01372	-1.45746	0.00149934	hypothetical protein
76.m02661	-1.4569	0.0178221	glutathione S-transferase, putative
55.m04894	-1.45612	0.00073589	N-acetlytransferase-related
55.m04848	-1.45408	3.29458e-05	hypothetical protein
542.m00219	-1.45299	0.00572601	hypothetical protein
541.m02054	-1.4521	0.00946626	hypothetical protein
55.m04936	-1.45018	0.00768257	hypothetical protein
1.m00014	-1.44893	0.0035978	hypothetical protein
55.m04887	-1.4485	0.0198299	C2 domain-containing protein
42.m00044	-1.44794	0.00877658	hypothetical protein
20.m03751	-1.44753	0.00349155	hypothetical protein
540.m00330	-1.44713	0.0153016	mob1/phocein family domain-containing protein
145.m00321	-1.44528	0.00825852	hypothetical protein
20.m03669	-1.44452	0.0111349	U3 small nucleolar ribonucleoprotein complex-associated protein, putative
55.m04673	-1.44364	0.0018041	major ampullate spidroin 2
55.m00236	-1.44343	9.84238e-05	hypothetical protein
59.m03530	-1.44341	0.0429935	hypothetical protein
541.m00143	-1.44272	0.00229644	methionine aminopeptidase, type II, putative
44.m02616	-1.44237	0.00796087	transmembrane domain-containing protein
583.m09199	-1.44065	0.0156163	hypothetical protein
41.m01274	-1.43859	0.00299382	hypothetical protein
46.m00011	-1.43831	0.0181819	hypothetical protein
33.m00004	-1.43831	0.0101297	SAG2 related antigen SAG2E
33.m00003	-1.43815	0.00358469	DNA repair enzyme, putative
50.m03194	-1.43801	0.0230997	hypothetical protein
50.m03347	-1.43638	0.0304491	MAK16 protein, putative
35.m01972	-1.4363	0.0181424	hypothetical protein
46.m01725	-1.43489	0.0483133	soraphen polyketide synthase-related
33.m01284	-1.43371	1.18197e-05	4'-phosphopantetheinyl transferase, putative
55.m00193	-1.43345	0.0287182	adenylosuccinate lyase, putative
611.m00052	-1.43318	0.0115981	enoyl-CoA hydratase, putative
42.m03483	-1.43309	0.000830947	zinc finger protein, putative
33.m01361	-1.43235	0.0249736	hypothetical protein
83.m02720	-1.43009	0.00444807	hypothetical protein
80.m02132	-1.42863	0.0319503	hypothetical protein
55.m00256	-1.4275	0.0318543	pumilio-family RNA binding repeat domain-containing protein
20.m07361	-1.42704	0.00680852	hypothetical protein
541.m01246	-1.42329	0.000417657	hypothetical protein
50.m03399	-1.42286	0.0230452	acyl-CoA-binding protein, putative
42.m00117	-1.42255	0.000394015	ATP-dependent RNA helicase, putative
49.m03419	-1.42194	0.00427405	hypothetical protein
44.m04653	-1.42176	0.00566638	hypothetical protein
83.m02140	-1.4199	0.00357358	hypothetical protein
31.m00879	-1.41964	0.00314555	dentin sialophosphoprotein-related
50.m00089	-1.41736	0.00716262	hypothetical protein
20.m03857	-1.41728	0.0271927	hypothetical protein
44.m02801	-1.41722	0.00198055	triosephosphate isomerase, putative
641.m02557	-1.41543	6.53773e-05	CDK-activating kinase assembly factor, putative
55.m10278	-1.4153	0.000343525	hypothetical protein
38.m02365	-1.41418	0.00570521	hypothetical protein
42.m03371	-1.41351	0.00234425	vacuolar sorting receptor protein, putative
583.m05298	-1.413	0.0103084	hypothetical protein
46.m00008	-1.41245	0.0335028	M16 peptidase domain-containing protein
80.m02322	-1.4112	0.0147056	interferon gamma-inducible protein 30
35.m00849	-1.41094	0.00338525	hypothetical protein
20.m00338	-1.41085	0.00870488	3'-5' exoribonuclease csl4, putative
542.m00409	-1.41064	0.00375589	conserved hypothetical protein
583.m05439	-1.40988	0.00103471	protein kinase domain-containing protein
583.m09211	-1.40832	0.0123689	hypothetical protein
83.m01294	-1.408	0.00279048	hypothetical protein
645.m00309	-1.40793	0.00386273	RNA recognition motif domain-containing protein
59.m06102	-1.40763	0.00385879	hypothetical protein
25.m01804	-1.40696	0.000337442	myosin heavy chain, putative
583.m05647	-1.4063	0.0116836	hypothetical protein
44.m02544	-1.40382	0.000285761	hypothetical protein
76.m01568	-1.40377	0.0259426	hypothetical protein
76.m02658	-1.40377	0.00104231	translation initiation factor SUI1, putative
55.m04893	-1.40321	0.0177128	hypothetical protein
83.m01236	-1.40255	0.000695391	EF hand domain-containing protein
72.m00903	-1.40175	0.0291769	hypothetical protein
20.m03881	-1.40129	2.77218e-05	phosphoglycerate mutase domain protein-related
55.m04759	-1.40126	0.00610701	hypothetical protein
42.m05836	-1.398	0.0140962	hypothetical protein
35.m00931	-1.39705	0.00132836	hypothetical protein
49.m03355	-1.3964	0.00409907	hypothetical protein
61.m00117	-1.39608	0.0270153	hypothetical protein
49.m03233	-1.39525	0.0174932	hypothetical protein
50.m03142	-1.39358	0.000823166	hypothetical protein
583.m05393	-1.39214	0.04126	U5 snRNP-specific 40 kDa protein (hPrp8-binding), putative
50.m00044	-1.3917	0.000112353	prefoldin subunit, putative
541.m01234	-1.38921	0.00012935	hypothetical protein
59.m00031	-1.38906	0.00726236	phosphatidylserine decarboxylase proenzyme, putative
44.m04620	-1.38856	0.011101	hypothetical protein
55.m04927	-1.38734	0.0350013	jmjC domain-containing protein
31.m00902	-1.38697	0.00221611	CHCH domain-containing protein
52.m01550	-1.38695	0.00267774	hypothetical protein
49.m03360	-1.38645	0.0423092	DNA methyltransferase, putative
55.m08210	-1.38632	0.00553421	tRNA-specific adenosine deaminase, putative
583.m00658	-1.38624	0.00111996	WD repeat protein, putative
59.m06074	-1.38585	0.00124412	hypothetical protein
50.m00027	-1.38566	0.000273467	eukaryotic aspartyl protease, putative
50.m03329	-1.3855	0.00585137	hypothetical protein
25.m00002	-1.38523	0.0061698	protease inhibitor 2, putative
55.m00002	-1.38209	0.00036316	myosin C, putative
583.m05707	-1.38197	0.0112525	conserved hypothetical protein
37.m00743	-1.37912	0.000856091	glutaminyl-tRNA synthetase, putative
541.m02060	-1.37649	0.00488386	hypothetical protein
59.m03671	-1.37559	0.00339716	hypothetical protein
55.m04631	-1.37552	0.0163257	hypothetical protein
583.m00013	-1.37538	0.00226343	iron-containing superoxide dismutase
583.m09176	-1.3751	0.00185422	selR domain-containing protein
74.m00461	-1.37499	0.0307081	nudix hydrolase NUDT5, ADP-sugar pyrophosphatase (Nucleosidediphosphate-linked moiety X motif 5)-related
86.m00366	-1.37498	0.0213529	hypothetical protein
33.m01369	-1.37484	0.0305796	adenosine deaminase-related
113.m00782	-1.37465	0.00179959	myosin light chain-related
20.m05960	-1.37296	0.0345411	exosome complex exonuclease, putative
59.m06076	-1.37268	0.00778848	hypothetical protein
583.m05303	-1.37204	0.00675887	hypothetical protein
542.m00225	-1.37107	0.0429104	jmjC domain-containing protein
65.m01144	-1.36961	0.045818	hypothetical protein
52.m01590	-1.36864	0.00105729	hypothetical protein
59.m00042	-1.36777	0.0146142	pyrroline-5-carboxylase reductase, putative
49.m03383	-1.36762	0.0141388	hypothetical protein
44.m00049	-1.36719	0.00323552	inosine-5'-monophosphate dehydrogenase, putative
162.m00001	-1.36524	0.0255545	calcium-dependent protein kinase, putative / calmodulin-domain protein kinase, putative
33.m01348	-1.36413	0.00743408	aggrecan core protein-related
41.m00015	-1.36352	0.00417899	dual-specificity phosphatase, catalytic domain-containing protein
25.m01787	-1.3634	0.0286258	transcription factor IIIB subunit, putative
39.m00617	-1.36299	0.0190961	hypothetical protein
44.m02579	-1.36227	0.0496567	hypothetical protein
83.m01207	-1.3607	0.00606401	mitochondrial carrier domain-containing protein
583.m05551	-1.35999	0.0175265	hypothetical protein
80.m00063	-1.35997	0.000586734	tryptophanyl-tRNA synthetase, putative
57.m00023	-1.35977	0.0396445	conserved hypothetical protein
52.m02696	-1.35974	0.00407972	cox19 family domain-containing protein
42.m05838	-1.35932	0.0418051	hypothetical protein
76.m01613	-1.35839	0.00200314	hypothetical protein
50.m03355	-1.3582	0.000552972	hypothetical protein
20.m03899	-1.35694	0.0424682	dual-specificity phosphatase laforin, putative
41.m01299	-1.35556	0.00053987	hypothetical protein
42.m03587	-1.35405	0.0190614	hypothetical protein
583.m00712	-1.35293	0.00963773	adenylyl cyclase associated protein
33.m02662	-1.35108	0.0381087	thiamin pyrophosphokinase, putative
33.m01354	-1.35098	0.00676603	iron-sulfur subunit of succinate dehydrogenase, putative
42.m00050	-1.35096	0.00801945	triosephosphate isomerase, putative
42.m03452	-1.35083	0.0146758	hypothetical protein
583.m05664	-1.3508	0.0155657	hypothetical protein
35.m00905	-1.35029	0.00643829	hypothetical protein
41.m01352	-1.3498	0.0130806	hypothetical protein
55.m10295	-1.34887	0.00431674	ferrichrome ABC transporter, ATP-binding protein-related
59.m03559	-1.34824	0.00186553	hypothetical protein
41.m00030	-1.34739	0.00868713	serine/threonine protein phosphatase, putative
46.m01602	-1.34726	0.0119973	hypothetical protein
44.m02752	-1.34695	0.00469065	erv1 / Alr family domain-containing protein
33.m01312	-1.34581	0.0461451	hypothetical protein
540.m00194	-1.34416	0.0074772	retinitis pigmentosa GTPase regulator-related
52.m01540	-1.3435	0.00270457	nuclear DNA-binding protein, putative
583.m00619	-1.34343	0.00024091	60s ribosomal protein L4, putative
59.m03394	-1.34285	0.00546723	uncharacterized ACR, YagE family COG1723 domain-containing protein
113.m01287	-1.34246	0.00136923	hypothetical protein
57.m01779	-1.342	0.0243521	conserved hypothetical protein
583.m05384	-1.34176	0.0048917	protein phosphatase 2C, putative
59.m03397	-1.34157	0.0433257	hypothetical protein
20.m03943	-1.33994	0.00994719	PHD-zinc finger (C3HC4 type) protein, putative
20.m05875	-1.3398	0.0127043	hypothetical protein
41.m01377	-1.33866	0.00639484	sedlin (trafficking protein particle complex protein 2), putative
55.m04984	-1.33751	0.0219627	hypothetical protein
55.m04842	-1.33705	0.00671253	orotidine-monophosphate-decarboxylase-related
25.m02941	-1.33652	0.0134054	hypothetical protein
35.m01586	-1.3365	0.029049	hypothetical protein
25.m00214	-1.33617	0.0326104	protein phosphatase 2C, putative
26.m00242	-1.33594	0.0188896	RNA helicase-1
64.m00325	-1.33571	0.00171698	ppg3, putative
55.m04868	-1.33565	0.0296353	folate/methotrexate transporter, putative
44.m02791	-1.33497	0.00252963	hypothetical protein
74.m00427	-1.33408	0.0441948	ATP synthase-related
80.m00025	-1.3336	0.0442386	cyclophilin, putative
25.m00208	-1.33333	0.0401626	wdr22 protein-related
50.m03272	-1.33298	0.000728375	hypothetical protein
83.m01287	-1.33251	0.0441806	RNA recognition motif. (a.k.a. RRM, RBD, or RNP domain) protein
8.m00181	-1.3324	0.00258859	rhomboid family domain-containing protein
83.m00012	-1.33229	0.00722934	hypothetical protein
42.m03557	-1.33222	0.0148576	hypothetical protein
65.m00003	-1.33163	0.0104351	multiprotein bridging factor type 1, putative
583.m00672	-1.33154	0.000830468	hypothetical protein
540.m00331	-1.33066	0.00534175	hypothetical protein
44.m00005	-1.3305	0.000212957	peroxisomal catalase
46.m01610	-1.3287	0.0212885	hypothetical protein
83.m01233	-1.32855	0.00743382	hypothetical protein
49.m00003	-1.32509	0.00350809	cAMP-dependent protein kinase regulatory subunit, putative
46.m01609	-1.32184	0.00938061	hypothetical protein
55.m00244	-1.32068	0.0035067	ankyrin repeat-containing protein
645.m00305	-1.31705	0.00275644	pre-mRNA splicing factor 18, putative
50.m05665	-1.31675	6.6475e-05	hypothetical protein
46.m00012	-1.31608	0.0129844	hypothetical protein
38.m00017	-1.31375	0.008045	dihydrolipoamide succinyltransferase component of 2-oxoglutaratedehydrogenase complex, putative
42.m03299	-1.31368	0.0165268	hypothetical protein
20.m03828	-1.31099	0.0180678	isy1-like splicing family domain-containing protein
42.m03368	-1.31086	0.0441765	transcription factor S-II (TFIIS) central domain-containing protein
42.m00074	-1.31055	0.00486689	hypothetical protein
74.m00760	-1.3104	0.034097	glutamine amidotransferase, SNO family domain-containing protein
25.m00206	-1.31021	0.0285955	exonuclease domain-containing protein
31.m00093	-1.30959	0.0379098	conserved hypothetical ATP binding protein, putative
52.m02725	-1.30913	0.0104134	hypothetical protein
583.m05517	-1.30907	0.0149254	ATP-dependent RNA helicase, putative
44.m02755	-1.30833	0.00456987	small heat shock protein, putative / bradyzoite-specific protein, putative
49.m03291	-1.30806	0.00915451	mitochondrial carrier protein, putative
59.m00043	-1.30749	0.0301099	seryl-tRNA synthetase-related
583.m05377	-1.30734	0.0302164	NLI interacting factor-like phosphatase domain-containing protein
641.m00170	-1.30616	0.0303125	protein phosphatase 2C, putative
50.m00033	-1.30577	0.00621773	caltractin (centrin), putative.
583.m00713	-1.30543	0.0398304	mitochondrial import inner membrane translocase subunit TIM17, putative
37.m00750	-1.30501	0.00221023	splicing factor, putative
25.m01782	-1.30478	0.0389674	MORN repeat-containing protein
551.m00227	-1.30477	0.0128494	hypothetical protein
74.m00446	-1.30443	0.020935	surface antigen, putative
42.m00055	-1.30418	0.000677505	hypothetical protein
641.m03159	-1.30247	0.0373674	conserved hypothetical protein
541.m01141	-1.30121	0.00966744	hypothetical protein
83.m01279	-1.3005	0.025228	rhomboid family domain-containing protein
74.m00459	-1.29947	0.015055	hypothetical protein
583.m00665	-1.29815	0.00873517	hypothetical protein
52.m00012	-1.29807	0.0201056	protein antigen, putative
49.m03361	-1.29796	0.00208619	hypothetical protein
42.m00066	-1.29738	0.00614051	transmembrane domain-containing protein
44.m00018	-1.2972	0.0401014	ribosomal protein L3p-related
52.m00002	-1.29682	0.0119087	P35 surface antigen
583.m00626	-1.29634	0.00938127	hypothetical protein
80.m00090	-1.29617	0.00902474	oxidoreductase, putative
583.m00605	-1.29546	0.0111375	long-chain-fatty-acid-CoA ligase, putative
20.m03748	-1.29304	0.00161124	C2 domain-containing protein
55.m04870	-1.29295	0.00933986	CCR4-NOT transcription complex subunit, putative
113.m00789	-1.29223	0.0378926	serine/threonine protein phosphatase, putative
65.m00002	-1.29201	0.0105049	H4, putative
55.m04691	-1.29187	0.0113308	hypothetical protein
41.m01379	-1.29114	0.0160917	14 kDa phosphohistidine phosphatase, putative
72.m00001	-1.29037	0.00195554	non-transmembrane antigen
25.m00197	-1.28959	0.014681	vacuolar ATP synthase subunit H, putative
55.m05098	-1.28859	0.00739121	aminotransferase, putative
583.m09170	-1.28852	0.03743	hypothetical protein
49.m00022	-1.28798	0.0162487	ribosomal protein L24, putative
25.m00006	-1.28713	0.0038134	microneme protein 4 (MIC4)
55.m05052	-1.28675	0.000571651	hypothetical protein
583.m05670	-1.28653	0.0190195	hypothetical protein
583.m00642	-1.28597	0.00530059	hypothetical protein
41.m01336	-1.28375	0.0291358	hypothetical protein
44.m04697	-1.28346	0.0322974	hypothetical protein
69.m00134	-1.28302	0.00927257	ATP-dependent RNA helicase, putative
50.m03117	-1.28204	0.0120824	phospholipase D active site motif domain-containing protein
55.m04981	-1.28195	0.0388821	hypothetical protein
44.m00029	-1.2808	0.0020144	exosome complex exonuclease, putative
57.m03124	-1.28076	0.00691877	acetyl-coenzyme A synthetase, putative
28.m00429	-1.28065	0.0182192	hypothetical protein
583.m00667	-1.28052	0.0375658	DEAD/DEAH box helicase, putative
80.m02214	-1.28047	0.0397459	hypothetical protein
162.m00508	-1.28025	0.0137034	hypothetical protein
49.m03169	-1.28016	0.00252158	hypothetical protein
55.m04718	-1.27974	0.00481385	homocysteine S-methyltransferase-1
83.m00004	-1.27964	0.0156321	glucose-6-phosphate dehydrogenase
50.m00010	-1.27747	0.00703129	microneme protein 10 (MIC10)
583.m05617	-1.27688	0.0459591	adapter-related protein complex, putative
33.m01302	-1.27645	0.0192287	D-3-phosphoglycerate dehydrogenase, putative
46.m00002	-1.27631	0.00734362	fructose-1,6-bisphosphate aldolase
55.m10232	-1.27508	0.00182358	conserved hypothetical protein
59.m00078	-1.27488	0.00275719	zinc finger, ZZ type domain-containing protein
50.m03164	-1.2732	0.00249909	lipid phosphate phosphohydrolase 3, putative
49.m07230	-1.27298	0.0311855	hypothetical protein
50.m00072	-1.27195	0.0350682	NAD-specific glutamate dehydrogenase, putative
583.m05618	-1.27071	0.0167953	protein-tyrosine phosphatase, putative
46.m01704	-1.27057	0.00014285	hypothetical protein
76.m02668	-1.2689	0.0384048	hypothetical protein
55.m00281	-1.26886	0.020187	DNA-directed RNA polymerase, putative
20.m00005	-1.26802	0.00783128	dense granule protein 7
583.m00608	-1.26708	0.0242087	ubiquitin-conjugating enzyme E2, putative
50.m03219	-1.2669	0.0186489	hypothetical protein
55.m10242	-1.26627	0.0264071	conserved hypothetical protein
8.m00004	-1.26537	0.0342927	hypothetical protein
46.m00010	-1.26504	0.000139568	U2 snRNP auxiliary factor or splicing facotr, putative
42.m00051	-1.26449	0.0112974	hypothetical protein
59.m03468	-1.26355	0.0226657	hypothetical protein
37.m00741	-1.26199	0.0353613	protease inhibitor, putative
28.m00283	-1.26147	0.021846	hypothetical protein
25.m02946	-1.26114	0.00046296	hypothetical protein
52.m01593	-1.2603	0.00628032	hypothetical protein
583.m00695	-1.25905	0.0489928	hypothetical protein
583.m00661	-1.25786	0.0285304	small heat shock protein, putative / bradyzoite-specific protein, putative
86.m00374	-1.2542	0.00290687	got1-like family domain-containing protein
44.m02641	-1.25327	0.0014423	ribosomal protein S11, putative
35.m00934	-1.25283	0.00467605	conserved hypothetical protein
20.m05914	-1.25275	0.0188904	microneme protein 11 (MIC11)
8.m00185	-1.25258	0.0227905	subtilase family serine protease, putative
33.m00006	-1.25063	0.0212665	MIC2-associated protein (M2AP)
583.m05521	-1.2493	0.0356822	hypothetical protein
20.m03659	-1.24855	0.0228393	hypothetical protein
57.m01774	-1.24825	0.0244277	protein kinase domain-containing protein
541.m00139	-1.24728	0.00780153	tRNA pseudouridine synthase B, putative
42.m03356	-1.24711	0.0100865	hypothetical protein
641.m00182	-1.2453	0.00719454	choline kinase, putative
72.m00843	-1.24459	0.0199929	KH domain containing protein
80.m02265	-1.24315	0.00151091	conserved hypothetical protein
55.m00005	-1.24285	0.0470951	apical membrane antigen 1, putative
35.m00915	-1.24247	0.0306634	nucleotidase, putative
33.m01355	-1.24208	0.0231287	conserved hypothetical protein
20.m05934	-1.24088	0.00089461	hypothetical protein
583.m05762	-1.24009	0.00241221	hypothetical protein
50.m03187	-1.23852	0.0430837	hypothetical protein
41.m02937	-1.23844	0.0490336	hypothetical protein
76.m01543	-1.23735	0.0228768	hypothetical protein
583.m11411	-1.23643	0.000940718	SRS domain containing protein
35.m01592	-1.23074	0.00953215	hypothetical protein
44.m02716	-1.23074	0.00471544	hypothetical protein
38.m01892	-1.22859	0.0109213	elongation factor 1, putative
39.m00364	-1.22712	0.0136504	RNase H, putative
37.m00747	-1.22685	0.000996002	hypothetical protein
25.m00212	-1.22638	0.0156748	microneme protein, putative
35.m00880	-1.22569	0.0325486	hypothetical protein
49.m00042	-1.22561	0.0331213	hypothetical protein
44.m05939	-1.22461	0.0317838	hypothetical protein
42.m03350	-1.2237	0.00764576	aminopeptidase N, putative
57.m03117	-1.22311	0.00185263	phosphodiesterase, putative
583.m05581	-1.22109	0.000739862	ribosome biogenesis protein BMS1-related
44.m00048	-1.22102	0.0280825	2OG-Fe(II) oxygenase family oxidoreductase, putative
20.m03913	-1.22038	0.0465868	integral membrane protein, putative
49.m03228	-1.21925	0.00565902	ferredoxin, putative
38.m01064	-1.21789	0.0279482	GTPase domain-containing protein
55.m04670	-1.21642	0.00610911	polyposis locus protein 1-related
25.m00200	-1.21497	0.00784667	ribosomal protein S9-related
38.m00016	-1.21372	0.0288473	actin, putative
20.m03872	-1.21316	0.00445971	hypothetical protein
57.m03131	-1.21206	0.0430552	acyl-CoA thioester hydrolase, putative
46.m01717	-1.21151	0.0111419	hypothetical protein
41.m01384	-1.21144	0.0107895	coproporphyrinogen oxidase, putative
59.m06060	-1.20975	0.00385343	la domain-containing protein
55.m04847	-1.20912	0.0451713	hypothetical protein
583.m05284	-1.20665	0.00616361	HD domain-containing protein
583.m05337	-1.20619	0.0119528	conserved hypothetical protein
59.m00023	-1.20556	0.0309936	hypothetical protein
25.m02945	-1.20515	0.0301797	hypothetical protein
76.m01687	-1.20413	0.00411268	hypothetical protein
25.m00220	-1.2036	0.00962239	ras-related protein RAB5B, putative
50.m07106	-1.20311	0.0318946	hypothetical protein
44.m04681	-1.20174	0.0372888	hypothetical protein
583.m09119	-1.20162	0.00640605	hypothetical protein
38.m00015	-1.20148	0.0238353	nuclear movement domain-containing protein
52.m00006	-1.20136	0.0493426	RNA recognition motif zinc finger (CCCH type) domain-containing protein
641.m01461	-1.20026	0.00806662	hesB protein-related
55.m08215	-1.19841	0.0340057	signal recognition particle 14 kDa protein, putative
35.m00035	-1.19792	0.0464689	50S ribosomal protein L24, putative
35.m00015	-1.19517	0.0292872	non-muscle myosin heavy chain-related
83.m00005	-1.19451	0.0444205	carboxyvinyl-carboxyphosphonate phosphorylmutase, putative
25.m01826	-1.19292	0.0276108	ubiquitin-conjugating enzyme E2, putative
55.m05107	-1.19155	0.0487489	hypothetical protein
33.m02666	-1.19044	0.0155352	hypothetical protein
641.m01530	-1.18947	0.00329646	hypothetical protein
26.m00232	-1.18841	0.0171062	hypothetical protein
46.m01658	-1.18828	0.0440821	hypothetical protein
64.m00337	-1.18466	0.0292871	microneme protein, putative
50.m03419	-1.18409	0.0364328	hypothetical protein
35.m00846	-1.18371	0.0391072	hypothetical protein
50.m03305	-1.18349	0.0300204	hypothetical protein
583.m05718	-1.1831	0.0448846	hypothetical protein
540.m00199	-1.18035	0.0162023	internalin, putative
38.m02371	-1.18034	0.0131453	hypothetical protein
8.m00002	-1.17877	0.00822334	hypoxanthine-xanthine-guanine phosphoribosyl transferase
50.m05654	-1.17285	0.0298718	nuclear movement domain-containing protein
583.m05408	-1.17122	0.0153155	zinc finger (CCCH type) protein, putative
65.m02506	-1.16911	0.00197017	hypothetical protein
38.m01069	-1.16867	0.0384628	pyruvate dehydrogenase kinase-related
20.m03948	-1.16732	0.00507595	hypothetical protein
25.m03618	-1.16471	0.0117002	conserved hypothetical protein
583.m00687	-1.16393	0.0489426	hypothetical protein
76.m01672	-1.16155	0.0266043	hypothetical protein
49.m00019	-1.16142	0.0122646	cyclophilin, putative
583.m09190	-1.1603	0.0415943	hypothetical protein
80.m00012	-1.15756	0.0188667	microneme protein 1 (MIC1)
42.m00032	-1.15715	0.00153037	aminopeptidase N, putative
76.m01657	-1.15711	0.0217193	hypothetical protein
49.m03211	-1.15432	0.0415637	hypothetical protein
162.m00327	-1.15408	0.021969	septum formation protein maf, putative
83.m01215	-1.154	0.00248595	hypothetical protein
641.m01501	-1.15326	0.0137797	eukaryotic translation initiation factor 6, putative
20.m03918	-1.15212	0.024772	nascent polypeptide-associated complex alpha chain, putative
57.m00002	-1.15055	0.00699162	glutathione/thioredoxin peroxidase, putative
31.m00920	-1.14715	0.0168657	hypothetical protein
27.m01468	-1.14376	0.00349721	TB2/DP1, HVA22 domain-containing protein
59.m03691	-1.14242	0.0186716	hypothetical protein
59.m03542	-1.14168	0.00758545	hypothetical protein
44.m04695	-1.14055	0.0365616	hypothetical protein
67.m00007	-1.13989	0.0435687	hypothetical protein
50.m05684	-1.13855	0.0033801	hypothetical protein
55.m00209	-1.13743	0.00224684	nucleic acid binding protein, putative
65.m02505	-1.13692	0.0314928	hypothetical protein
83.m01280	-1.13383	0.0290367	hypothetical protein
20.m05902	-1.13247	0.00372918	hypothetical protein
55.m00047	-1.13063	0.0494661	conserved hypothetical protein
42.m03638	-1.13015	0.00676168	hypothetical protein
83.m01230	-1.12931	0.0127233	transcription elongation factor (TFIIS), putative
65.m01959	-1.12831	0.0467941	hypothetical protein
50.m05614	-1.12169	0.0220738	hypothetical protein
50.m03125	-1.12094	0.0243491	G10 protein homolog, putative
20.m05894	-1.11985	0.0418474	hypothetical protein
55.m00021	-1.116	0.0310893	myosin light chain (TgMLC1)
20.m03648	-1.11305	0.0299607	hypothetical protein
551.m00226	-1.11257	0.0286207	hypothetical protein
57.m00037	-1.11215	0.00767314	conserved hypothetical protein
46.m00003	-1.11184	0.035381	membrane fatty acid desaturase
35.m00026	-1.10975	0.0178023	ATP-dependent RNA helicase, putative
20.m03816	-1.10843	0.0403362	hypothetical protein
583.m05588	-1.10714	0.0454351	RNA recognition motif 2 domain-containing protein
42.m03543	-1.08226	0.0456548	hypothetical protein
20.m03892	-1.07	0.0105558	u1 small nuclear ribonucleoprotein 70 kda-related protein
