# Supplementary material for: Toxoplasma gondii Lysine Acetyltransferase GCN5-A Functions in the Cellular Response to Alkaline Stress and Expression of Cyst Genes
Source: PLOS journal article supplement (doi:10.1371/journal.ppat.1001232), 2010-12-16
Supplement: S3 (10.1371/journal.ppat.1001232.s003) [file journal.ppat.1001232.s003]

Table S1: Independent RT-PCR confirmation of microarray data

| Gene ID                                                              | Microarray |                 | RT-PCR           |                  |
|----------------------------------------------------------------------|------------|-----------------|------------------|------------------|
|                                                                      | WT         | $\Delta$ GCN5-A | WT               | $\Delta$ GCN5-A  |
| <i>Genes up-regulated in WT during alkaline stress</i>               |            |                 |                  |                  |
| 641.m01566                                                           | 2.29       | -1.06           | 1.5 $\pm$ 0.03   | -1.4 $\pm$ 0.01* |
| 541.m01237                                                           | 3.29       | 1.52            | 2.4 $\pm$ 0.05   | 1.3 $\pm$ 0.08   |
| 641.m01498                                                           | 7.4        | 2.0             | 2.8 $\pm$ 0.08   | 1.3 $\pm$ 0.1    |
| 76.m01548                                                            | 7.01       | 5.24            | -2.8 $\pm$ 0.04  | -3.6 $\pm$ 0.09  |
| <i>Genes with no significant change in WT during alkaline stress</i> |            |                 |                  |                  |
| 41.m02959                                                            | 1.35       | 2.05            | 1.07 $\pm$ 0.07  | 1.5 $\pm$ 0.7    |
| 49.m03159                                                            | 1.2        | 2.38            | -1.1 $\pm$ 0.03  | 1.8 $\pm$ 0.14   |
| 162.m00002                                                           | 1.16       | 2.4             | -1.25 $\pm$ 0.06 | 1.4 $\pm$ 0.6    |
| 641.m01597                                                           | -1.05      | 1.2             | -2.1 $\pm$ 0.03  | -1.6 $\pm$ 0.17* |
| <i>Genes down-regulated in WT during alkaline stress</i>             |            |                 |                  |                  |
| 20.m00368                                                            | -4.37      | -3.7            | -4.7 $\pm$ 0.03  | -8.3 $\pm$ 0.09  |
| 46.m01600                                                            | -3.22      | -2.74           | -6.2 $\pm$ 0.05  | -3.7 $\pm$ 0.09  |
| 55.m04769                                                            | -6.6       | -6.31           | -1.2 $\pm$ 0.1   | -4.5 $\pm$ 0.1   |
| 641.m01514                                                           | -3.21      | -3.24           | -15.6 $\pm$ 0.1  | -3.8 $\pm$ 0.3   |

Values represent fold-change in microarrays and fold change normalized to tubulin mRNA levels in RT-PCRs ( $\pm$ S.E.  $\Delta$ Ct). WT = wild-type. Student's t-test was performed for RT-PCR data and p values were <0.05 except for two samples indicated with asterisks. With exception of 76.m01548, each gene tested reproduces the trend observed with the microarrays.
